# Supplementary material for: Expression and promoter analysis of MEP pathway enzyme-encoding genes in Pinus massoniana Lamb
Source: PeerJ. 2022 Apr 12;10:e13266. doi: 10.7717/peerj.13266 (PMC9012177; doi:10.7717/peerj.13266)
Supplement: Supplemental Information 2 [file peerj-10-13266-s002.xls]

## Sheet: Table S1
Isolation and expression analysis of MEP pathway enzyme genes and promoters analysis in Pinus massoniana Lamb.
Peihuang Zhu, Yu Chen, Fan Wu, Miaojing Meng and Kongshu Ji *
Key Laboratory of Forestry Genetics & Biotechnology of Ministry of Education, Co-Innovation Center for Sustainable Forestry in Southern China, Nanjing Forestry University, Nanjing 210037, China
Table S1. The primers used in ORF amplification
Gene ID	Forward primer (5'-3')	Reverse primer (5'-3')	function	CDS
PmDXS1	ATGGCGACGACCATGGCCATGGC	TCAAGACATTACTTGCAGTGCTTCTC	for ORF amplification	ATGGCGACGACCATGGCCATGGCATCGTCTGCTGTAATCCAATCCAATGCTAATCAGTTAAGTTCGATGGGTTTCGCATTCTCGTCTGGAAGTCTACGCCACCAAATCAAGCCTACAAAGCTCGAATCCATGAAGTTGGGAAGGCGGGTTGGTAAAGCTTATGCCAGTGCTTTATCTGACCAAGGAGAGTACTATTCAGAGAAGCCACCGACACCTCTCCTGGACACAATCAATTATCCGATTCATATGAAGAATCTCTCTATTCGAGAGCTTAAACAACTTTCAAATGAACTTCGTTCTGACATAATTTTTGAGGTTTCAAGAACCGGTGGCCACCTTGGATCTAGCCTTGGTGTGGTTGAGCTTACGGTGGCACTTCATTATGTCTTTGATGCTCCT…
PmDXS2	ATGGCATCACTGGGAGTGGTTTC	TCAGTGGAGCTGCAGAGCACTCTG	for ORF amplification	ATGGCATCACTGGGAGTGGTTTCTGTCGGATCATCGCCATCCATGGTCATAAATTGGAGCAATATATCTCAACCAAGAACTACGTTGTGGAGCGGGCGATTCAAGATCTTGCCGAAGCAGAATATTTCAACTCTTCAAAGGACTCCATTAAAGTCGAAGCATGGGATAGTCTCTGCAATAGCAGGCAATGCTGATGGAGACGAAAACATGAAAGGAATTTGCAATGCAGAAAAGAATGGCCCTCTAAAGATTACGTATAGTGGTGAGAAGCCTCCGACGCCATTGTTGGACACTATAAATTATCCAATCCATATGAAGAATCTCAAGATAAAGGAGTTGAGGCAGCTTGCGAAGGAGCTTAGAGAGGAGATCATATTTAGTGTTGCAGAGACAGGAGGC…
PmDXS3	ATGGCAATTGCAAGCAGGGCAGGAG	TTATCGGTGCTTCAGAAGAGCATCA	for ORF amplification	ATGGCAATTGCAAGCAGGGCAGGAGTTGCACCCATCCTTCAAGTAGACTGCCCTTTCACCCATTTCAATTCAATGACTGAATTGGGTTCTCGGAATAGTACGTTGTTTCAGTCTGCAATACCCTGCTCATTTCGACAGATTAGGGCGACCACTAAAAGAAAGCGTTGTGTCTTGTTTGCTAAGCTAAGTAATTCCGATGGAGAAAAGGGGAAAAATGTGAAAGCAGCTGTGGAGGTTGCTTCAAAGAGTGGATTCCCAGCTGAGAAACCTCCTACACCGTTGCTTGACACCGTTAATTATCCAGTACACTTAAAGAATCTCTCTATACAGGATCTAGAGCAACTGGCAACAGAAATTAGAGCAGAACTTGTGTTCGGTGTGGCAAAAACTGGAGGCCAC…
PmDXR	ATGGCAGTGACAATTCCGCTGGGCA	TCAGACTGTGGCAGGCTCCAAGCTT	for ORF amplification	ATGGCAGTGACAATTCCGCTGGGCAGATTTTCTGTGCATCTGGCGGACTCCAGACCTGCACCTGGATTGGCTTCCTGCGACTCTGCCATCTTCACCGGGTCTAAAAAGCTAAAGCCAATTGGGATTAGTTTAAAAGGCAGAACAAGACGAGCCTTTGAAAGAACTACACACTGTTCCCTACAAGCACCTCCTCCTGCCTGGCCAGGAAGAGCAGTTGTAGATGAAGATAGAAAAGTATGGGATGGTCCAAAACCCTTTTCTGTTGTTGGTTCTACAGGCTCAATCGGAACTCAGACATTGGACATTGTTGCCGAACATCCGGATAAGTTCAGGGTTGTTGCACTAGCAGCTGGTTCAAATGTGACACTACTTGCAGATCAGGTTAGGAGATTCAAGCCA…
PmMCT	ATGGCCTTCTCACGATACAGTACC	TCATCTTTGGTTCAAAATTCTTTCTGCA	for ORF amplification	ATGGCCTTCTCACGATACAGTACCCCTATCTCTGCTCCTGCGACGCTTGCTGGCTCGTCGAAGCTGCTTCCAAGTTCATCTCCATGGAACAATGTCAGAAATAACAGATTAGTATTGGGAACTTCCATCCCAAATTGCTTACGTTTACGAGGAGGGCGTGCTCATGGCAATTTTCATGTTCATGTGGTGGAGTCGAAGTCACGTTTAAGGGCGAAGGCTGTTTCAGACAAGGACGCCGATGATATATCTTCTCAGACTAATGAGCTAGTTCCAAAGAAAAGCGTCTCTGTTATTCTACTAGCTGGAGGCAAAGGAAAGCGAATGGGGGCAAGCATGCCCAAACAGTATCTTCCATTATTAGGGCAGCCTATTGCACTTTATAGTTTCCGAATTTTCTCC…
PmCMK	ATGGCATTCATGGCTGCTTGTTC	TCACCTGAAAGCACCCTGAACAGC	for ORF amplification	ATGGCATTCATGGCTGCTTGTTCTTCTTTTGCAACATTCCATGTCCACACCCATGGTTCGAACGGGCCCCTGGCCACTTTTCATGGCAGTCAGCTGAAATGGAAAGGACGGAGAAACCCCTCTTCTTGCAAAGTGCGCGTTGGTTTTGCAGCAAAAGCCATGAGTTCCGATTCCAATGACAGCGCCAAGCAAATGAAGTTTGTTTATGATCAAATGGAGCCGATGGAGAAGTGCAGGCAGCTTGACACCAGCCCAAGTCCTCACAGTTTATCTCTGTTCTCACCATCAAAGATCAATGTGTTTCTGAGAATAACGAACAAGAGACCTGATGGTTTCCATGATCTGGCGTCATTGTTTCATGTAATTAGCTTAGGAGACACAATTCAGTTTTCTTTATCT…
PmMDS	ATGGCGGCCTTCACAACATTCAC	CTATCTTCTTCATTAGAAGAACCACTGTG	for ORF amplification	ATGGCGGCCTTCACAACATTCACCTCCCTCACCCTCCCAAAATCAACATGCCATCAGCCCTGCCAGACTGCATTCTGTGCGCCCGTTTGGAAGCCAATCAACTTCAAAGCCCCTGGAGCTCACAGAATATCAATCCGGGGTCCGATTCTAGCCTCTGTATTGAAACATGAAGTTATATCTGAGGTGTCTGCAAGCACTGTGATTGCGACTGAAACGCGTGGTGGGAGTGCTAAGCCTGCTGCTGTTTTGCCATTTAGAATTGGGCATGGTTTTGATTTGCACCGTCTGGAGCCCAACTTACCCCTTATTATTGGAGGAGTAAACATACCCCATGATCGAGGCTGTGACGCTCACTCTGATGGTGATGTTCTGCTTCATTGCGTTGTTGATGCAATTCTT…
PmHDS	ATGGCTGCTGGAACAATTCCTGCT	TTATTCTTCAGCAGGAGGATCGAC	for ORF amplification	ATGGCTGCTGGAACAATTCCTGCTTCGTTCTCTGGTTTGAAGAAAACCGATTCCTTGCCAGGCTGCTTGCAGAGTACCCATGCTAGAAAAGGCTTTGCTATGCATAACTTTCAGAATCCGAGGTCATCGTCATTCCGGATAAGGTTTAGGGGGGTCAGGAACTCATCCTCAGACATTGCAGAAATGAAGCCAGCTTCTGAGGGCAGTCCACTTTTGGTTCCCAGGCAGAAGTATTGTGAATCCATATACAAGACAATACGCAGAAAAACACGTACAGTGATGGTTGGCAATGTCCCACTTGGGAGCGAACATCCTATCAGGGTTCAAACAATGACTACTACTGATACAAAGGATGTTCTTGGTACCGTAGAACAGGTCATGCGAATAGCCGATAAAGGA…
PmHDR1	ATGGCTCAAGCGTGCGCGGTGTTG	CTATGCTGCTTGCAGAGCCTCTTCT	for ORF amplification	ATGGCTCAAGCGTGCGCGGTGTTGAGTTCTGTTTCCTCGTGCAGAAATGACGCGTTGCAGAGTGCCCAAGTGATGATGTTGCAGGTTAGGCATTCGCCTCTTGTGCATAATCAAAATCATATAAATATCAGGAGACAGAAGGAGAAGAAGAAGATTACAGCTGGAATTGGTATCGTTCGATGCCACGGAGGAGCAGCTACTACTGCTATGGAGGCGTCCGAGTCAGAGGAATTCGACTCAAAATCCTTCAGAAAAAACTTAACGAGAAGCAAAAATTATAACAGAAAAGGATTTGGGTACAAGGACGAGATGCTGGCCTTGATGGATCAAGAGTACACGAGTGATCTGGTGAAGACTCTAAAAGAAAATAACAATGAGTTTACTTGGGGGAATGTGACA…
PmHDR2	ATGCCTTCGAGCCTCAGCTTTGCA	CTATACCGTCTGCAACGCCTCCTC	for ORF amplification	ATGCCTTCGAGCCTCAGCTTTGCAGCAGTTTGCAGACCTGAAGCTGTAGGACCAAGAACTTTAAGCAATGGACGTGGGAGTTTGGTTATTGCGGATTCATCAGCCATTTTGAGTATAAGATTGACTCGTGCAATGCAACCAGATGTCTGCAGAAACTTGAAGCTAAGGAGGACACAAGTTAGAAGTGATGCTGCTCCTAGCGCTGTAGATTCACATACAGGGGAATTTGATACGAAAGCTTTCAGGAGGACTTTGACTAGAAAAGAAAATTATAACAGAAAGGGATTTGGTCACAAGGAAGAAACGCTTGAAGCAATGGACAAAGAGTATACTAGTGATATCATTAAAACATTGAAAGAAAACAACAATGAATACACTTGGGGTAATGTAACTGTTAAG…
PmIPPI	ATGCCTTTTGCTGTAACCAGTACTTTG	AGTCAATTTATGTATGGTTTTCATATCAACTGC	for ORF amplification	ATGCCTCCCACTCTTCTATTGGCGAATACATGGGCATCTTCTGCCATAGTTTCCAGGAGGGTATCACTCTTTGTGGCTTGCTCAACCACTGTAGTCTCTCGTTCATTCAGTAAGAGCTGCTCCGGTGCTATCCCCCGGAAGCCCAAATCTGCTTATCCCGCAATCACTGGGAGCAGAACTTGCTTCTCCCGGAACCCAATTGTTAGAAATTTGATTGGATCCGCTTCTAAGATGGGCGCGACAGTGGAGGATACGACCATGGATGCTGTTCAGAGGCGGCTCATGTTCGAAGATGAGTGCATCTTGGTGGATGAAGAGGATCATGTCATTGGGCATGACTCAAAATACAATTGTCACTTGATGGAGAAAATAGAGTCAGAGAATCTATTGCATAGAGCT…

## Sheet: Table S2
Table S2. The primers used in vector construction
Gene ID	Forward primer (5'-3')	Reverse primer (5'-3')	function
PmDXS1	AGAACACGGGGGACTCTAGAATGGCGACGACCATGGCCATGGC	CCCTTGCTCACCATGGATCCAGACATTACTTGCAGTGCTTCTC	for vector construction used to subcellular localization
PmDXS2	AGAACACGGGGGACTCTAGAATGGCATCACTGGGAGTGGTTTC	CCCTTGCTCACCATGGATCCGTGGAGCTGCAGAGCACTCTG	for vector construction used to subcellular localization
PmDXS3	AGAACACGGGGGACTCTAGAATGGCAATTGCAAGCAGGGCAGGAG	CCCTTGCTCACCATGGATCCTCGGTGCTTCAGAAGAGCATCA	for vector construction used to subcellular localization
PmDXR	AGAACACGGGGGACTCTAGAATGGCAGTGACAATTCCGCTGGGCA	CCCTTGCTCACCATGGATCCGACTGTGGCAGGCTCCAAGCTT	for vector construction used to subcellular localization
PmMCT	AGAACACGGGGGACTCTAGAATGGCCTTCTCACGATACAGTACC	CCCTTGCTCACCATGGATCCTCTTTGGTTCAAAATTCTTTCTGCA	for vector construction used to subcellular localization
PmCMK	AGAACACGGGGGACTCTAGAATGGCATTCATGGCTGCTTGTTC	CCCTTGCTCACCATGGATCCCCTGAAAGCACCCTGAACAGC	for vector construction used to subcellular localization
PmMDS	AGAACACGGGGGACTCTAGAATGGCGGCCTTCACAACATTCAC	CCCTTGCTCACCATGGATCCTCTTCTTCATTAGAAGAACCACTGTG	for vector construction used to subcellular localization
PmHDS	AGAACACGGGGGACTCTAGAATGGCTGCTGGAACAATTCCTGCT	CCCTTGCTCACCATGGATCCTTCTTCAGCAGGAGGATCGAC	for vector construction used to subcellular localization
PmHDR1	AGAACACGGGGGACTCTAGAATGGCTCAAGCGTGCGCGGTGTTG	CCCTTGCTCACCATGGATCCTGCTGCTTGCAGAGCCTCTTCT	for vector construction used to subcellular localization
PmHDR2	AGAACACGGGGGACTCTAGAATGCCTTCGAGCCTCAGCTTTGCA	CCCTTGCTCACCATGGATCCTACCGTCTGCAACGCCTCCTC	for vector construction used to subcellular localization
PmIPPI	AGAACACGGGGGACTCTAGAATGCCTCCCACTCTTCTATTGGC	CCCTTGCTCACCATGGATCCAGTCAATTTATGTATGGTTTTCATATCAAC	for vector construction used to subcellular localization
pET28a-PmDXS1	GTGGTGGTGGTGGTGCTCGAGATGGCGACGACCATGGCCATGGC	TCGAGCTCCGTCGACAAGCTTTCAAGACATTACTTGCAGTGCTTCTC	for vector construction used to functional complementation
pET28a-PmDXS2	GTGGTGGTGGTGGTGCTCGAGATGGCATCACTGGGAGTGGTTTC	TCGAGCTCCGTCGACAAGCTTTCAGTGGAGCTGCAGAGCACTCTG	for vector construction used to functional complementation
pET28a-PmDXS3	GTGGTGGTGGTGGTGCTCGAGATGGCAATTGCAAGCAGGGCAGGAG	TCGAGCTCCGTCGACAAGCTTTTATCGGTGCTTCAGAAGAGCATCA	for vector construction used to functional complementation
																	TUA	CAAACTTGGTCCCGTATCCTC	CACAGAAAGCTGCTCATGGTAA	for qPCR analysis

## Sheet: Table S3
Table S3. The primers used in hiTAIL PCR amplification for promoters isolation
Gene ID	5'-3'	function
LAD-1	ACGATGGACTCCAGAGCGGCCGCVNVNNNGGAA	for hiTAIL PCR
LAD-2	ACGATGGACTCCAGAGCGGCCGCBNBNNNGGTT	for hiTAIL PCR
LAD-3	ACGATGGACTCCAGAGCGGCCGCVVNVNNNCCAA	for hiTAIL PCR
LAD-4	ACGATGGACTCCAGAGCGGCCGCBBNBNNNCGGT	for hiTAIL PCR
AC1	ACGATGGACTCCAGAG	for hiTAIL PCR
PmDXS1-0b	CCCGCCTTCCCAACTTCATGGATTCGAG	for hiTAIL PCR
PmDXS1-1b	ACGATGGACTCCAGTCCGGCCGGCTTGATTTGGTGGCGTAGACTT	for hiTAIL PCR
PmDXS1-2b	CGATGCCATGGCCATGGTCGTCGCCAT	for hiTAIL PCR
PmDXS2-0b	CTGCTTCGGCAAGATCTTGAATCGCCCG	for hiTAIL PCR
PmDXS2-1b	ACGATGGACTCCAGTCCGGCCCTCCACAACGTAGTTCTTGGTTGAGA	for hiTAIL PCR
PmDXS2-2b	CCATGGATGGCGATGATCCGACAGAAACCACT	for hiTAIL PCR
PmDXS3-0b	GTGGTCGCCCTAATCTGTCGAAATGAGCAGGGT	for hiTAIL PCR
PmDXS3-1b	ACGATGGACTCCAGTCCGGCCCCGAGAACCCAATTCAGTCATTGAA	for hiTAIL PCR
PmDXS3-2b	GCAACTCCTGCCCTGCTTGCAATTGCCAT	for hiTAIL PCR
PmDXR-0b	GACCCGGTGAAGATGGCAGAGTCGCAG	for hiTAIL PCR
PmDXR-1b	ACGATGGACTCCAGTCCGGCCGCCAATCCAGGTGCAGGTCTGGAGT	for hiTAIL PCR
PmDXR-2b	CTGCCCAGCGGAATTGTCACTGCCAT	for hiTAIL PCR
PmMCT-0b	CCATGAGCACGCCCTCCTCGTAAACGT	for hiTAIL PCR
PmMCT-1b	ACGATGGACTCCAGTCCGGCCGCAATTTGGGATGGAAGTTCCCAA	for hiTAIL PCR
PmMCT-2b	GCGTCGCAGGAGCAGAGATAGGGGTACT	for hiTAIL PCR
PmCMK-0b	GCTTGGCGCTGTCATTGGAATCGGAACTCA	for hiTAIL PCR
PmCMK-1b	ACGATGGACTCCAGTCCGGCCTGCAAAACCAACGCGCACTTTGCAA	for hiTAIL PCR
PmCMK-2b	GGCCCGTTCGAACCATGGGTGTGGACAT	for hiTAIL PCR
PmMDS-0b	GAGCTCCAGGGGCTTTGAAGTTGATTGGCT	for hiTAIL PCR
PmMDS-1b	ACGATGGACTCCAGTCCGGCCCAAACGGGCGCACAGAATGCAGTCT	for hiTAIL PCR
PmMDS-2b	GGGAGGTGAATGTTGTGAAGGCCGCCAT	for hiTAIL PCR
PmHDR1-0b	GCACAAGAGGCGAATGCCTAACCTGCAACA	for hiTAIL PCR
PmHDR1-1b	ACGATGGACTCCAGTCCGGCCCTTGGGCACTCTGCAACGCGTCAT	for hiTAIL PCR
PmHDR1-2b	CTCAACACCGCGCACGCTTGAGCCAT	for hiTAIL PCR
PmHDR2-0b	GGCTGATGAATCCGCAATAACCAAACTCCCA	for hiTAIL PCR
PmHDR2-1b	ACGATGGACTCCAGTCCGGCCCGTCCATTGCTTAAAGTTCTTGGTCCT	for hiTAIL PCR
PmHDR2-2b	GGTCTGCAAACTGCTGCAAAGCTGAGGCT	for hiTAIL PCR
PmIPPI-0b	TTGGGCTTCCGGGGGATAGCACCGGA	for hiTAIL PCR
PmIPPI-1b	ACGATGGACTCCAGTCCGGCCGCAGCTCTTACTGAATGAACGAGAGA	for hiTAIL PCR
PmIPPI-2b	CCCTCCTGGAAACTATGGCAGAAGATGCCCA	for hiTAIL PCR

## Sheet: Table S4
Table S4. The primers used in qPCR analysis
Gene ID	Forward primer (5'-3')	Reverse primer (5'-3')	function
TUA	CAAACTTGGTCCCGTATCCTC	CACAGAAAGCTGCTCATGGTAA	for qPCR analysis
PmDXS1	GGTCGTGACTTGAAAGGGAAAAA	TGAGTGCACCCACTGGTGGTATA	for qPCR analysis
PmDXS2	TTTTGATGTCACTTATATGGCTTGT	GAGGGGTTCCTTTGTTGTTTGG	for qPCR analysis
PmDXS3	CTTCGACGTAGGAATAGCAGAACA	AAGAACCACAATGAGTAGGACCG	for qPCR analysis
PmDXR	AAGAACTACACACTGTTCCCTACAAG	TGGCTTGAATCTCCTAACCTGA	for qPCR analysis
PmMCT	AATTTTCATGTTCATGTGGTGGA	CCTAATAATGGAAGATACTGTTTGGG	for qPCR analysis
PmCMK	TGAAATGGAAAGGACGGAGAAA	AACTGTGAGGACTTGGGCTGGT	for qPCR analysis
PmMDS	ATGTTCTGCTTCATTGCGTTGTT	TCCTTATGGGGACTTAGTTTCGG	for qPCR analysis
PmHDS	CCCAGGGGTATGGTGGAATCA	CTCCGCAACAAGTAAACGGTATG	for qPCR analysis
PmHDR1	GCAACTGCTTCTTTTGCAGGAAC	TTGACCAAGTCAACATCTGGGTC	for qPCR analysis
PmHDR2	GGTAACCGCATTGCATACAAACT	AACGCCTCCTCATCCTTCATCTT	for qPCR analysis
PmIPPI	GTGCATCCCAATCCAGAAGAGG	ACAGCCAGACGGAACCAAGG	for qPCR analysis

## Sheet: Table S5
Table S5. The information of ten promoters of MEP genesanalysis
ID	Length/bp	Sequence
PmDXS1	1714	CAACTTGGAATACGTGTCCCATGACCTTGGTCTTATTTTATTTACATGGAAAATTAACCAGAGATTGTTACACCTTAGGTATCAAGGAGGACTCATGAGGTGGATTTGATGTCAAAGTAGTTGGTTAAGTCATGGCATGTTAAACTGTAAAGGATGATGTTTCCTCAGGCATCAAGGTACCTTGTAAATATCTTGATCAATTGTTTCAAAATTTATGCCAAATTTCAAATATATGTTCATATAGTTAATTAAGCTTAAGGCTTTTCTATGATGAGGTTTATCCTCACGAAACTATTCAGATTTGTCGTCCTTGACAGAATCTGAACAAATGTCCCTCCCCCTCCACGCACTCCCCTTTGTTTAAAATTAATGCATTGATTTGTGAAATCGAAAAATAAG…
PmDXS2	735	CTCCAGAGCGGCCGCCAAACATCCAACGATGGACTCCAGAGCGGCCGCGGGCGATTCATGAAGAAAACGTTGAACACAGAAGAAAATTGCAATCTTTTGCATAAATTATACAAAGAACTCCTTTTTGCCACCTGCTTTCATTTTATACCGAATCATTGCTCTAGTTGGTACTAATAAATAGGTCTCCTATCCTCCTCCATCTTCACCAATTTAAGCCACTATCAAAGTTCCAGTGAATGTCAGATTTCTGGAACCATTGTATTGCTCTGTTTGGATTGCTAGATTGGCCTTAGCTGCCGTATTTATATCTCTTCTGCCAGGCTTCATCCTTGTCCCTCCCTCCTGTCTGTGTGAATAAAAATCAACTACGTCCATTGGGCATTGAAATTGTGTCTGAGT…
PmDXS3	859	GGTACACAAACATTGAATCTATAAAATACATTCGAACATCCAATTTTCCACCATTCCAAACTATACAACGGCAACAAATAATCAATCTACCCAATCTACCCATAGACCATAATACCTGTGAGACCATAAATATCCTTGACCATAAAACATAAATACACACAAGATATATATGCCCACTGTTGGATTACTGACCTACTAAAATCTAACCAAAATCTAACCGTACAACCAGTGAATTAATGACCCATTAACAAATTAGTTATTTTTAAACCCATACAACACCTTTCCAAGTTGCACCCTCATATGTCCAACTTTTTCAAACAACGTCAGAGTTCCGGCTTTTCATGGCAAAGAGCGAGAACTATCCAACTAATTACATGTTGACTTTGCCATACGATTTCC…
PmDXR	1212	AGCACAAATGCCAATGGTCAAAACCCATTAAAACTAAAAGTAATGGAATGCTGCATATAGTCTATGCCAAAATTTTTGGATTAAGCATGATCCACTTTAATAGATGGAATATCTTCTGCCTGAACCACAATGAAGACCGACTCTAAGAGATCTTTAAGAGTAAGATGTGAGAGCCATGGGTGTAGGGCATCCTTAAAGGATCTAGACTGAGAGGAAGAGGGCACACCCCAGCCTTTGGCTCCATCGTTTAATCTTGAAATTAAAAAGCTTGAAGCATCCTTGGTTATGCCATAATCATCGAGCAAATTTCTTTCTTGAAGCTACCTACCACTGTGAAGGAGTTGCATAAACATGGAGGGGATTCCCATCCGATCTTGAATTCTAGCTACGAGTGAAGAG…
PmMCT	577	ATGCGTGCGAAATGCAAATTCCGCTGAACTTAATCAATCAATTAGCAGTAGAGACAGAGACTATCCTGCATTGCAACTATTAATCTTATTAATATTTGAAACGTAAAAGATAAAAATATATGTATTATTAATGTTTCAAACATAAAAATACAAATAAAAATTAATATTAATAAAACTTATTAACTCTTTTTTGAAATATAAAAAAATAAGTTAATGGCCAAAGCTGCTTAATTAGCCAACATCCGCAACTAAATTATAATAGATTTTCTTGTTTAATATTAAAAATATAATATATATTATATATAATTTAGAAAAAAATTAAATTTATGGTCAACCTTCCTATAAAGTCAATAAATGTGAATAAATCACTGGATACACTGCCGGCAGTGCGGCACTTAA…
PmCMK	1654	TTTTGATGATAGTGGAATGAGGCATTATTTGTATATTCAATCCTAAAGATAAATTCAACTTCAAATTCGAGAATTGTAACTTGCAAATAACCTTTTTGTATGTTCACTTGTACTTCTTTGAAATTCAATTGAATTGCGTTGTAAATAGGTATATTTTCAGTAAATGTTAATACCCTTCATTTGCCGAGTTTGAATTTCTAGTCCAAGATCAAATTCTTAAATGCTAACATTGTCATCGAGTTGGTCACATGAATGATTAGTGTTTTGATATCCATTCTTGAGTATTGACACATCTTGTCGTGATGTTTTTCATCTTTTCACTTTTATCTAAGGGGGGAGGGGGGGGCCATAATATTAGTGATTGACAGGCATGGTTTAAGTTTCAAAGTCCTATCAATC…
PmMDS	1431	AGGCAAAGGAAAAGGGTTGGTAGGGAAATGCCATTTAGTTGGTTCATTTTGTTTGTGATTTTTATTGGGGAGGAGCATGGTTTTCACAAGCTTTGTAAGGAAGTGCATTGCATTGAAGGGGAAGGCCAAAAATGTAGGGATAAGATTGGTTACTTTATTCTCTTGGCTGATTACTAAGTTGCTGATTGGAGGAGGCCACTGAGAATTATGAAACATATGGAAAAACAAGATCTGCAAGGAACCATGAAACTAATATGGACCAAAGGAGACTATTGTAGAGAGCAGAGGAGGAAATTGATTACCTAAGGCACCAGATTAAGGAGCTTTGGTATAAACTAGGACAGAGTTAACACTGCTCTTTCCCCTTTAATAACTCAATTAATGATGTGTCCTGATTTG…
PmHDR1	1276	GCCCTCAAATAGCTCTGATACGATGTAGAAATTTACAGGGTAAGTTCCTCAAATAGAACATCAAAAGACACCGCTCACAAACAGATCACAGATCAATACACCAGTATTCTTGACGTGGTTAAAACCCTCAAAGAGGGAAACAGTCCACAGCTTGAGACAATGTGGCCACTTCAGGCAATTTATTAATAACAAAAAAATTACATAAGCTTCTCTCATGAATGGTCACCCTACAAATGACCCTCCATGCTCTTTAAATAGAGATCATGGTCCAATTGGGTGTTAAGCCATGGATCAAGTGTCGATAATACAGAGGAGAGAATGAACTGCCGAATCACTTCATGTCTAGAGCATATCATGACTGTCGGATTGTAAGTTACAAAAGTACATAGTaAAAAAAAC…
PmHDR2	820	CTGGGAGCTTAATCTTTTGGAGTTCCCTAGTAATGTCCTCAACTGGAGGTATTCTATCATAGTCTCTAGATCCCTCGGGGTTCCCTAACCCTGATGAAGGGTGTTCCCCTTCCATTTCATTTGTTTGGCGCCCTCTTAAGGTTTCATTAATTGCTTCCAGGGAACGCAGGATGAGAGTCAATTCTAGTGAAGGTAATGGGTTATTTGAAGGAGGTCCTTGTGAAGACTCCCCAGGCACTTGGTTCCTTCGCTTCCTCACCATTTTGATTTGTTCAAAATCTGCACGATATCTAAGACTTATTAATCCATCCTAGGACTTGTCCCTGTTAGTTGACTCACATACATGATATTCATAAAAAAAAAAATTTCACTATGCTTGTAAACAAGCATTATTAGTAC…
PmIPPI	562	AGAGTATCTAAGTTCAAAAAAGGCGTCTTCATACTGAAAATTCATCATCTACACGACCTTTGAGAGTATCCCATCATCCAATGAACCTGAGAGTATCTAAGTTCAAAAAAGGCGTCTTCATACTGAAAATTCATCACCTACACGACCTTTGAGAGTATATTAAGTCAAGAGTGGTTTGCTCCCCGAGGAAAATTCGTCTCACTCCTTTGAAGTTGAAGGTCAAAAACACGTGATGTGACTGTATGTAACCAAATTTCTTTGACCTTGAAAAAATTACCAGCGAGGGCAGAAAAAGAGTTGATGCGTCCACGAAGGGGAAAAAATAAAACAAATGCGAGGAATCTATTGAAAGGGCAAACAATGGGAAAGCTTCCATATTTAAATCCCAATTGGATTGGC…

## Sheet: Table S6
Table S6. The analysis of ten promoters using PlantCARE
ID	Site Name	sequence	Position	Strand	Organism	function
PmCMK	TGA-element	AACGAC	462	-	Brassica oleracea	auxin-responsive element
PmCMK	TGA-element	AACGAC	1521	-	Brassica oleracea	auxin-responsive element
PmCMK	ARE	AAACCA	372	-	Zea mays	cis-acting regulatory element essential for the anaerobic induction
PmCMK	ARE	AAACCA	516	+	Zea mays	cis-acting regulatory element essential for the anaerobic induction
PmCMK	ARE	AAACCA	576	+	Zea mays	cis-acting regulatory element essential for the anaerobic induction
PmCMK	ARE	AAACCA	853	-	Zea mays	cis-acting regulatory element essential for the anaerobic induction
PmCMK	ARE	AAACCA	1622	-	Zea mays	cis-acting regulatory element essential for the anaerobic induction
PmCMK	TCCC-motif	TCTCCCT	804	+	Spinacia oleracea	part of a light responsive element
PmCMK	MYB	TAACCA	741	-	Arabidopsis thaliana
PmCMK	MYB	TAACCA	811	+	Arabidopsis thaliana
PmCMK	MYB	CAACCA	874	+	Arabidopsis thaliana
PmCMK	as-1	TGACG	613	-	Arabidopsis thaliana
PmCMK	Unnamed__1	CGTGG	1493	-	Zea mays
PmCMK	GATA-motif	GATAGGA	389	-	Arabidopsis thaliana	part of a light responsive element
PmCMK	GT1-motif	GGTTAA	742	+	Arabidopsis thaliana	light responsive element
PmCMK	GT1-motif	GGTTAA	810	-	Arabidopsis thaliana	light responsive element
PmCMK	TATA-box	TATACA	30	-	Helianthus annuus	core promoter element around -30 of transcription start
PmCMK	TATA-box	TATA	32	+	Arabidopsis thaliana	core promoter element around -30 of transcription start
PmCMK	TATA-box	TACAAAA	94	-	Oryza sativa	core promoter element around -30 of transcription start
PmCMK	TATA-box	TATA	150	+	Arabidopsis thaliana	core promoter element around -30 of transcription start
PmCMK	TATA-box	TATAA	538	-	Arabidopsis thaliana	core promoter element around -30 of transcription start
PmCMK	TATA-box	TATA	539	+	Arabidopsis thaliana	core promoter element around -30 of transcription start
PmCMK	TATA-box	TATAA	671	-	Arabidopsis thaliana	core promoter element around -30 of transcription start
PmCMK	TATA-box	TATA	672	+	Arabidopsis thaliana	core promoter element around -30 of transcription start
PmCMK	TATA-box	TATA	1107	-	Arabidopsis thaliana	core promoter element around -30 of transcription start
PmCMK	TATA-box	TATA	1121	-	Arabidopsis thaliana	core promoter element around -30 of transcription start
PmCMK	TATA-box	TATA	1134	-	Arabidopsis thaliana	core promoter element around -30 of transcription start
PmCMK	TATA-box	TATA	1148	-	Arabidopsis thaliana	core promoter element around -30 of transcription start
PmCMK	TATA-box	TATA	1171	-	Arabidopsis thaliana	core promoter element around -30 of transcription start
PmCMK	TATA-box	ATATAA	1226	+	Brassica oleracea	core promoter element around -30 of transcription start
PmCMK	TATA-box	TATA	1227	-	Arabidopsis thaliana	core promoter element around -30 of transcription start
PmCMK	TATA-box	TATA	1243	-	Arabidopsis thaliana	core promoter element around -30 of transcription start
PmCMK	TATA-box	TATA	1314	-	Arabidopsis thaliana	core promoter element around -30 of transcription start
PmCMK	TATA-box	ATATAA	1330	+	Brassica oleracea	core promoter element around -30 of transcription start
PmCMK	TATA-box	TATA	1331	-	Arabidopsis thaliana	core promoter element around -30 of transcription start
PmCMK	Myb	CAACTG	907	+	Arabidopsis thaliana
PmCMK	Myb	CAACTG	1467	-	Arabidopsis thaliana
PmCMK		motif_sequence	100	+	organism	short_function
PmCMK		motif_sequence	566	-	organism	short_function
PmCMK		motif_sequence	638	+	organism	short_function
PmCMK		motif_sequence	660	-	organism	short_function
PmCMK		motif_sequence	726	-	organism	short_function
PmCMK		motif_sequence	803	+	organism	short_function
PmCMK		motif_sequence	829	+	organism	short_function
PmCMK		motif_sequence	890	-	organism	short_function
PmCMK		motif_sequence	910	+	organism	short_function
PmCMK		motif_sequence	933	+	organism	short_function
PmCMK		motif_sequence	1385	+	organism	short_function
PmCMK		motif_sequence	1396	+	organism	short_function
PmCMK	ATCT-motif	AATCTAATCC	982	+	Pisum sativum	part of a conserved DNA module involved in light responsiveness
PmCMK	CGTCA-motif	CGTCA	613	+	Hordeum vulgare	cis-acting regulatory element involved in the MeJA-responsiveness
PmCMK	TGACG-motif	TGACG	613	-	Hordeum vulgare	cis-acting regulatory element involved in the MeJA-responsiveness
PmCMK	MYC	CAATTG	126	+	Arabidopsis thaliana
PmCMK	MYC	CATTTG	178	+	Arabidopsis thaliana
PmCMK	MYC	CATGTG	246	-	Arabidopsis thaliana
PmCMK	MYC	CATTTG	583	+	Arabidopsis thaliana
PmCMK	MYC	CATTTG	701	+	Arabidopsis thaliana
PmCMK	MYC	CATTTG	849	+	Arabidopsis thaliana
PmCMK	MYC	CATGTG	1038	-	Arabidopsis thaliana
PmCMK	MYC	CATGTG	1040	+	Arabidopsis thaliana
PmCMK	MYC	CATTTG	1588	-	Arabidopsis thaliana
PmCMK	MYC	CATTTG	1615	-	Arabidopsis thaliana
PmCMK	STRE	AGGGG	331	+	Arabidopsis thaliana
PmCMK	STRE	AGGGG	338	+	Arabidopsis thaliana
PmCMK	STRE	AGGGG	954	-	Arabidopsis thaliana
PmCMK	G-box	CACGAC	297	-	Zea mays	cis-acting regulatory element involved in light responsiveness
PmCMK	MBS	CAACTG	907	+	Arabidopsis thaliana	MYB binding site involved in drought-inducibility
PmCMK	MBS	CAACTG	1467	-	Arabidopsis thaliana	MYB binding site involved in drought-inducibility
PmCMK	CAAT-box	CAAAT	27	-	Pisum sativum	common cis-acting element in promoter and enhancer regions
PmCMK	CAAT-box	CAAT	38	+	Nicotiana glutinosa
PmCMK	CAAT-box	CAAAT	62	+	Pisum sativum	common cis-acting element in promoter and enhancer regions
PmCMK	CAAT-box	CAAT	73	-	Nicotiana glutinosa
PmCMK	CAAT-box	CAAAT	84	+	Pisum sativum	common cis-acting element in promoter and enhancer regions
PmCMK	CAAT-box	CAAT	126	+	Nicotiana glutinosa
PmCMK	CAAT-box	CAAT	128	-	Nicotiana glutinosa
PmCMK	CAAT-box	CAAT	133	-	Nicotiana glutinosa
PmCMK	CAAT-box	CAAAT	179	-	Pisum sativum	common cis-acting element in promoter and enhancer regions
PmCMK	CAAT-box	CAAAT	210	+	Pisum sativum	common cis-acting element in promoter and enhancer regions
PmCMK	CAAT-box	CAAT	229	-	Nicotiana glutinosa
PmCMK	CAAT-box	CAAT	284	-	Nicotiana glutinosa
PmCMK	CAAT-box	CAAT	361	-	Nicotiana glutinosa
PmCMK	CAAT-box	CAAT	395	+	Nicotiana glutinosa
PmCMK	CAAT-box	CCAAT	435	+	Arabidopsis thaliana	common cis-acting element in promoter and enhancer regions
PmCMK	CAAT-box	CAAT	436	+	Nicotiana glutinosa
PmCMK	CAAT-box	CAAAT	495	-	Pisum sativum	common cis-acting element in promoter and enhancer regions
PmCMK	CAAT-box	CAAAT	500	-	Pisum sativum	common cis-acting element in promoter and enhancer regions
PmCMK	CAAT-box	CAAT	555	+	Nicotiana glutinosa
PmCMK	CAAT-box	CAAAT	560	-	Pisum sativum	common cis-acting element in promoter and enhancer regions
PmCMK	CAAT-box	CAAAT	584	-	Pisum sativum	common cis-acting element in promoter and enhancer regions
PmCMK	CAAT-box	CCAAT	598	+	Arabidopsis thaliana	common cis-acting element in promoter and enhancer regions
PmCMK	CAAT-box	CAAT	599	+	Nicotiana glutinosa
PmCMK	CAAT-box	CAAAT	702	-	Pisum sativum	common cis-acting element in promoter and enhancer regions
PmCMK	CAAT-box	CAAT	717	+	Nicotiana glutinosa
PmCMK	CAAT-box	CAAAT	850	-	Pisum sativum	common cis-acting element in promoter and enhancer regions
PmCMK	CAAT-box	CAAAT	878	+	Pisum sativum	common cis-acting element in promoter and enhancer regions
PmCMK	CAAT-box	CAAT	897	+	Nicotiana glutinosa
PmCMK	CAAT-box	CAAAT	924	-	Pisum sativum	common cis-acting element in promoter and enhancer regions
PmCMK	CAAT-box	TGCAAATCT	941	-	Brassica juncea	common cis-acting element in promoter and enhancer regions
PmCMK	CAAT-box	CAAAT	943	-	Pisum sativum	common cis-acting element in promoter and enhancer regions
PmCMK	CAAT-box	CAAAT	960	+	Pisum sativum	common cis-acting element in promoter and enhancer regions
PmCMK	CAAT-box	CAAAT	1030	+	Pisum sativum	common cis-acting element in promoter and enhancer regions
PmCMK	CAAT-box	CCAAT	1167	+	Arabidopsis thaliana	common cis-acting element in promoter and enhancer regions
PmCMK	CAAT-box	CAAT	1168	+	Nicotiana glutinosa
PmCMK	CAAT-box	CAAAT	1181	-	Pisum sativum	common cis-acting element in promoter and enhancer regions
PmCMK	CAAT-box	CAAAT	1256	-	Pisum sativum	common cis-acting element in promoter and enhancer regions
PmCMK	CAAT-box	CAAT	1302	+	Nicotiana glutinosa
PmCMK	CAAT-box	CAAAT	1327	+	Pisum sativum	common cis-acting element in promoter and enhancer regions
PmCMK	CAAT-box	CAAAT	1405	+	Pisum sativum	common cis-acting element in promoter and enhancer regions
PmCMK	CAAT-box	CAAT	1544	-	Nicotiana glutinosa
PmCMK	CAAT-box	CAAAT	1588	+	Pisum sativum	common cis-acting element in promoter and enhancer regions
PmCMK	CAAT-box	CAAAT	1598	+	Pisum sativum	common cis-acting element in promoter and enhancer regions
PmCMK	CAAT-box	CCAAT	1609	+	Arabidopsis thaliana	common cis-acting element in promoter and enhancer regions
PmCMK	CAAT-box	CAAT	1610	+	Nicotiana glutinosa
PmCMK	CAAT-box	CAAAT	1615	+	Pisum sativum	common cis-acting element in promoter and enhancer regions
PmCMK	CAAT-box	CCAAT	1631	-	Arabidopsis thaliana	common cis-acting element in promoter and enhancer regions
PmCMK	TCA-element	CCATCTTTTT	1070	-	Nicotiana tabacum	cis-acting element involved in salicylic acid responsiveness
PmCMK	TCA-element	CCATCTTTTT	1383	+	Nicotiana tabacum	cis-acting element involved in salicylic acid responsiveness
PmCMK	MRE	AACCTAA	982	+	Petroselinum crispum	MYB binding site involved in light responsiveness
PmCMK	MYB-like sequence	TAACCA	741	-	Arabidopsis thaliana
PmCMK	MYB-like sequence	TAACCA	811	+	Arabidopsis thaliana
PmCMK	Unnamed__4	CTCC	336	-	Petroselinum hortense
PmCMK	Unnamed__4	CTCC	509	+	Petroselinum hortense
PmCMK	Unnamed__4	CTCC	805	+	Petroselinum hortense
PmCMK	ATC-motif	AGTAATCT	1476	-	Spinacia oleracea	part of a conserved DNA module involved in light responsiveness
PmDXR	Unnamed__4	CTCC	239	+	Petroselinum hortense
PmDXR	Unnamed__4	CTCC	338	-	Petroselinum hortense
PmDXR	Unnamed__4	CTCC	354	-	Petroselinum hortense
PmDXR	Unnamed__4	CTCC	967	-	Petroselinum hortense
PmDXR	Unnamed__4	CTCC	977	-	Petroselinum hortense
PmDXR	Unnamed__4	CTCC	1050	+	Petroselinum hortense
PmDXR	Unnamed__4	CTCC	1072	-	Petroselinum hortense
PmDXR	Unnamed__4	CTCC	1102	+	Petroselinum hortense
PmDXR	AT-rich element	ATAGAAATCAA	531	-	Glycine max	binding site of AT-rich DNA binding protein (ATBP-1)
PmDXR	CAT-box	GCCACT	627	-	Arabidopsis thaliana	cis-acting regulatory element related to meristem expression
PmDXR	CAT-box	GCCACT	1125	-	Arabidopsis thaliana	cis-acting regulatory element related to meristem expression
PmDXR	MYB-like sequence	TAACCA	281	-	Arabidopsis thaliana
PmDXR	MYB recognition site	CCGTTG	900	-	Arabidopsis thaliana
PmDXR	O2-site	GTTGACGTGA	835	-	Zea mays	cis-acting regulatory element involved in zein metabolism regulation
PmDXR	STRE	AGGGG	356	+	Arabidopsis thaliana
PmDXR	STRE	AGGGG	437	-	Arabidopsis thaliana
PmDXR	STRE	AGGGG	527	-	Arabidopsis thaliana
PmDXR	STRE	AGGGG	567	+	Arabidopsis thaliana
PmDXR	STRE	AGGGG	811	-	Arabidopsis thaliana
PmDXR	STRE	AGGGG	955	-	Arabidopsis thaliana
PmDXR	STRE	AGGGG	1055	-	Arabidopsis thaliana
PmDXR	CAAT-box	CAAAT	5	+	Pisum sativum	common cis-acting element in promoter and enhancer regions
PmDXR	CAAT-box	CCAAT	11	+	Arabidopsis thaliana	common cis-acting element in promoter and enhancer regions
PmDXR	CAAT-box	CAAT	12	+	Nicotiana glutinosa
PmDXR	CAAT-box	CAAT	128	+	Nicotiana glutinosa
PmDXR	CAAT-box	CAAAT	303	+	Pisum sativum	common cis-acting element in promoter and enhancer regions
PmDXR	CAAT-box	CCAAT	445	-	Arabidopsis thaliana	common cis-acting element in promoter and enhancer regions
PmDXR	CAAT-box	CAAT	538	+	Nicotiana glutinosa
PmDXR	CAAT-box	CAAT	551	+	Nicotiana glutinosa
PmDXR	CAAT-box	CAAT	724	+	Nicotiana glutinosa
PmDXR	CAAT-box	CAAT	918	-	Nicotiana glutinosa
PmDXR	CAAT-box	CAAAT	986	+	Pisum sativum	common cis-acting element in promoter and enhancer regions
PmDXR	CAAT-box	CCAAT	1008	+	Arabidopsis thaliana	common cis-acting element in promoter and enhancer regions
PmDXR	CAAT-box	CAAT	1009	+	Nicotiana glutinosa
PmDXR	CAAT-box	CAAT	1024	-	Nicotiana glutinosa
PmDXR	CAAT-box	CAAAT	1149	-	Pisum sativum	common cis-acting element in promoter and enhancer regions
PmDXR	CAAT-box	CAAAT	1206	-	Pisum sativum	common cis-acting element in promoter and enhancer regions
PmDXR	TCT-motif	TCTTAC	160	-	Arabidopsis thaliana	part of a light responsive element
PmDXR	MYC	CATTTG	5	-	Arabidopsis thaliana
PmDXR	MYC	CATGTG	892	-	Arabidopsis thaliana
PmDXR	MYC	CATTTG	986	-	Arabidopsis thaliana
PmDXR	TATA	TATAAAAT	427	+	Arabidopsis thaliana
PmDXR		motif_sequence	111	+	organism	short_function
PmDXR		motif_sequence	214	-	organism	short_function
PmDXR		motif_sequence	394	-	organism	short_function
PmDXR		motif_sequence	466	+	organism	short_function
PmDXR		motif_sequence	481	+	organism	short_function
PmDXR		motif_sequence	543	+	organism	short_function
PmDXR		motif_sequence	606	+	organism	short_function
PmDXR		motif_sequence	895	+	organism	short_function
PmDXR		motif_sequence	905	-	organism	short_function
PmDXR	Myc	TCTCTTA	144	-	Arabidopsis thaliana
PmDXR	AT~TATA-box	TATATA	425	+	Arabidopsis thaliana
PmDXR	W box	TTGACC	16	-	Arabidopsis thaliana
PmDXR	AAGAA-motif	GAAAGAA	308	-	Avena sativa
PmDXR	TATA-box	TATA	56	+	Arabidopsis thaliana	core promoter element around -30 of transcription start
PmDXR	TATA-box	ATATAT	424	+	Brassica napus	core promoter element around -30 of transcription start
PmDXR	TATA-box	TATATA	425	+	Arabidopsis thaliana	core promoter element around -30 of transcription start
PmDXR	TATA-box	ATATAA	426	+	Brassica oleracea	core promoter element around -30 of transcription start
PmDXR	TATA-box	TATA	427	+	Arabidopsis thaliana	core promoter element around -30 of transcription start
PmDXR	TATA-box	TATAA	874	-	Arabidopsis thaliana	core promoter element around -30 of transcription start
PmDXR	TATA-box	TATA	875	-	Arabidopsis thaliana	core promoter element around -30 of transcription start
PmDXR	TATA-box	TATACA	879	-	Helianthus annuus	core promoter element around -30 of transcription start
PmDXR	TATA-box	TATA	881	-	Arabidopsis thaliana	core promoter element around -30 of transcription start
PmDXR	TATA-box	TATAAA	1171	-	Helianthus annuus	core promoter element around -30 of transcription start
PmDXR	TATA-box	TATAA	1172	-	Arabidopsis thaliana	core promoter element around -30 of transcription start
PmDXR	TATA-box	TATA	1173	-	Arabidopsis thaliana	core promoter element around -30 of transcription start
PmDXR	CCAAT-box	CAACGG	900	+	Hordeum vulgare	MYBHv1 binding site
PmDXR	WUN-motif	AAATTTCTT	304	+	Nicotiana glutinosa
PmDXR	TC-rich repeats	ATTCTCTAAC	405	-	Nicotiana tabacum	cis-acting element involved in defense and stress responsiveness
PmDXR	Unnamed__1	CGTGG	942	+	Zea mays
PmDXR	Sp1	GGGCGG	1052	-	Oryza sativa	light responsive element
PmDXR	MYB	TAACCA	281	-	Arabidopsis thaliana
PmDXS1	ABRE3a	TACGTG	11	+	Zea mays
PmDXS1	ABRE4	CACGTA	11	-	Zea mays
PmDXS1	ABRE	TACGTGTC	11	+	Oryza sativa	cis-acting element involved in the abscisic acid responsiveness
PmDXS1	ABRE	ACGTG	12	+	Arabidopsis thaliana	cis-acting element involved in the abscisic acid responsiveness
PmDXS1	ABRE	CGTACGTGCA	583	+	Hordeum vulgare	cis-acting element involved in the abscisic acid responsiveness
PmDXS1	ABRE	CACGTG	585	+	Arabidopsis thaliana	cis-acting element involved in the abscisic acid responsiveness
PmDXS1	ABRE	ACGTG	586	+	Arabidopsis thaliana	cis-acting element involved in the abscisic acid responsiveness
PmDXS1	ABRE	ACGTG	1304	+	Arabidopsis thaliana	cis-acting element involved in the abscisic acid responsiveness
PmDXS1	Unnamed__4	CTCC	86	-	Petroselinum hortense
PmDXS1	Unnamed__4	CTCC	335	+	Petroselinum hortense
PmDXS1	Unnamed__4	CTCC	341	+	Petroselinum hortense
PmDXS1	Unnamed__4	CTCC	350	+	Petroselinum hortense
PmDXS1	Unnamed__4	CTCC	598	+	Petroselinum hortense
PmDXS1	Unnamed__4	CTCC	604	+	Petroselinum hortense
PmDXS1	Unnamed__4	CTCC	638	-	Petroselinum hortense
PmDXS1	Unnamed__4	CTCC	946	+	Petroselinum hortense
PmDXS1	Unnamed__4	CTCC	1186	+	Petroselinum hortense
PmDXS1	MYB-like sequence	TAACCA	55	+	Arabidopsis thaliana
PmDXS1	MYB-like sequence	TAACCA	122	-	Arabidopsis thaliana
PmDXS1	MYB-like sequence	TAACCA	1528	-	Arabidopsis thaliana
PmDXS1	ACE	GACACGTATG	9	-	Petroselinum crispum	cis-acting element involved in light responsiveness
PmDXS1	MBS	CAACTG	551	+	Arabidopsis thaliana	MYB binding site involved in drought-inducibility
PmDXS1	CAAT-box	CAAT	64	-	Nicotiana glutinosa
PmDXS1	CAAT-box	CAAAT	104	-	Pisum sativum	common cis-acting element in promoter and enhancer regions
PmDXS1	CAAT-box	CAAT	198	+	Nicotiana glutinosa
PmDXS1	CAAT-box	CAAT	200	-	Nicotiana glutinosa
PmDXS1	CAAT-box	CAAAT	219	+	Pisum sativum	common cis-acting element in promoter and enhancer regions
PmDXS1	CAAT-box	CAAAT	226	+	Pisum sativum	common cis-acting element in promoter and enhancer regions
PmDXS1	CAAT-box	CAAAT	300	-	Pisum sativum	common cis-acting element in promoter and enhancer regions
PmDXS1	CAAT-box	CAAAT	326	+	Pisum sativum	common cis-acting element in promoter and enhancer regions
PmDXS1	CAAT-box	CAAT	374	-	Nicotiana glutinosa
PmDXS1	CAAT-box	CAAAT	378	-	Pisum sativum	common cis-acting element in promoter and enhancer regions
PmDXS1	CAAT-box	CAAAT	403	+	Pisum sativum	common cis-acting element in promoter and enhancer regions
PmDXS1	CAAT-box	CAAT	406	-	Nicotiana glutinosa
PmDXS1	CAAT-box	CAAAT	468	+	Pisum sativum	common cis-acting element in promoter and enhancer regions
PmDXS1	CAAT-box	CAAAT	507	-	Pisum sativum	common cis-acting element in promoter and enhancer regions
PmDXS1	CAAT-box	CAAAT	535	-	Pisum sativum	common cis-acting element in promoter and enhancer regions
PmDXS1	CAAT-box	CCAAT	675	-	Arabidopsis thaliana	common cis-acting element in promoter and enhancer regions
PmDXS1	CAAT-box	CAAAT	754	-	Pisum sativum	common cis-acting element in promoter and enhancer regions
PmDXS1	CAAT-box	CAAAT	807	-	Pisum sativum	common cis-acting element in promoter and enhancer regions
PmDXS1	CAAT-box	CAAT	858	-	Nicotiana glutinosa
PmDXS1	CAAT-box	CAAT	891	+	Nicotiana glutinosa
PmDXS1	CAAT-box	CCAAT	940	+	Arabidopsis thaliana	common cis-acting element in promoter and enhancer regions
PmDXS1	CAAT-box	CAAT	941	+	Nicotiana glutinosa
PmDXS1	CAAT-box	CAAT	952	+	Nicotiana glutinosa
PmDXS1	CAAT-box	CAAT	954	-	Nicotiana glutinosa
PmDXS1	CAAT-box	CAAT	997	+	Nicotiana glutinosa
PmDXS1	CAAT-box	CAAAT	1132	+	Pisum sativum	common cis-acting element in promoter and enhancer regions
PmDXS1	CAAT-box	CAAAT	1142	-	Pisum sativum	common cis-acting element in promoter and enhancer regions
PmDXS1	CAAT-box	CAAT	1163	-	Nicotiana glutinosa
PmDXS1	CAAT-box	CAAT	1201	+	Nicotiana glutinosa
PmDXS1	CAAT-box	CAAAT	1227	-	Pisum sativum	common cis-acting element in promoter and enhancer regions
PmDXS1	CAAT-box	CAAAT	1248	+	Pisum sativum	common cis-acting element in promoter and enhancer regions
PmDXS1	CAAT-box	CAAT	1271	-	Nicotiana glutinosa
PmDXS1	CAAT-box	CAAT	1296	+	Nicotiana glutinosa
PmDXS1	CAAT-box	CCAAT	1365	-	Arabidopsis thaliana	common cis-acting element in promoter and enhancer regions
PmDXS1	CAAT-box	CCAAT	1398	-	Arabidopsis thaliana	common cis-acting element in promoter and enhancer regions
PmDXS1	CAAT-box	CCAAT	1471	+	Arabidopsis thaliana	common cis-acting element in promoter and enhancer regions
PmDXS1	CAAT-box	CAAT	1472	+	Nicotiana glutinosa
PmDXS1	CAAT-box	CAAT	1598	-	Nicotiana glutinosa
PmDXS1	STRE	AGGGG	338	-	Arabidopsis thaliana
PmDXS1	STRE	AGGGG	352	-	Arabidopsis thaliana
PmDXS1	G-box	TACGTG	11	+	Arabidopsis thaliana	cis-acting regulatory element involved in light responsiveness
PmDXS1	G-box	CACGTG	585	+	Arabidopsis thaliana	cis-acting regulatory element involved in light responsiveness
PmDXS1	G-box	CACGTC	1303	-	Zea mays	cis-acting regulatory element involved in light responsiveness
PmDXS1	TCT-motif	TCTTAC	455	+	Arabidopsis thaliana	part of a light responsive element
PmDXS1	TCT-motif	TCTTAC	1443	-	Arabidopsis thaliana	part of a light responsive element
PmDXS1	Box 4	ATTAAT	366	+	Petroselinum crispum	part of a conserved DNA module involved in light responsiveness
PmDXS1	Box 4	ATTAAT	771	+	Petroselinum crispum	part of a conserved DNA module involved in light responsiveness
PmDXS1	G-Box	CACGTG	585	+	Pisum sativum	cis-acting regulatory element involved in light responsiveness
PmDXS1	MYC	CAATTG	198	+	Arabidopsis thaliana
PmDXS1	MYC	CATTTG	326	-	Arabidopsis thaliana
PmDXS1	MYC	CATTTG	806	+	Arabidopsis thaliana
PmDXS1	MYC	CAATTG	952	-	Arabidopsis thaliana
PmDXS1	MYC	CATTTG	1141	+	Arabidopsis thaliana
PmDXS1	MYC	CATGTG	1189	-	Arabidopsis thaliana
PmDXS1	W box	TTGACC	540	+	Arabidopsis thaliana
PmDXS1	ERE	ATTTTAAA	360	-	Nicotiana glutinos
PmDXS1	AT~TATA-box	TATATA	864	-	Arabidopsis thaliana
PmDXS1	AT~ABRE	TACGTGTC	11	+	Arabidopsis thaliana
PmDXS1		motif_sequence	233	+	organism	short_function
PmDXS1		motif_sequence	329	+	organism	short_function
PmDXS1		motif_sequence	592	+	organism	short_function
PmDXS1		motif_sequence	602	+	organism	short_function
PmDXS1		motif_sequence	743	-	organism	short_function
PmDXS1		motif_sequence	1040	-	organism	short_function
PmDXS1		motif_sequence	1184	+	organism	short_function
PmDXS1		motif_sequence	1369	-	organism	short_function
PmDXS1		motif_sequence	1452	+	organism	short_function
PmDXS1		motif_sequence	1462	+	organism	short_function
PmDXS1		motif_sequence	1496	+	organism	short_function
PmDXS1		motif_sequence	1629	-	organism	short_function
PmDXS1		motif_sequence	1634	-	organism	short_function
PmDXS1	Unnamed__6	taTAAATATct	183	+	Zea mays
PmDXS1	Unnamed__6	taTAAATATct	813	+	Zea mays
PmDXS1	TATA-box	ATATAT	229	+	Brassica napus	core promoter element around -30 of transcription start
PmDXS1	TATA-box	TATA	230	+	Arabidopsis thaliana	core promoter element around -30 of transcription start
PmDXS1	TATA-box	TATA	240	+	Arabidopsis thaliana	core promoter element around -30 of transcription start
PmDXS1	TATA-box	ATATAT	531	+	Brassica napus	core promoter element around -30 of transcription start
PmDXS1	TATA-box	TATA	532	+	Arabidopsis thaliana	core promoter element around -30 of transcription start
PmDXS1	TATA-box	TATA	651	+	Arabidopsis thaliana	core promoter element around -30 of transcription start
PmDXS1	TATA-box	TATAA	812	-	Arabidopsis thaliana	core promoter element around -30 of transcription start
PmDXS1	TATA-box	TATA	813	+	Arabidopsis thaliana	core promoter element around -30 of transcription start
PmDXS1	TATA-box	TATAA	823	-	Arabidopsis thaliana	core promoter element around -30 of transcription start
PmDXS1	TATA-box	TATA	824	+	Arabidopsis thaliana	core promoter element around -30 of transcription start
PmDXS1	TATA-box	ccTATAAAaa	833	+	Arabidopsis thaliana	core promoter element around -30 of transcription start
PmDXS1	TATA-box	TATA	853	+	Arabidopsis thaliana	core promoter element around -30 of transcription start
PmDXS1	TATA-box	ATATAT	863	-	Brassica napus	core promoter element around -30 of transcription start
PmDXS1	TATA-box	TATATA	864	-	Arabidopsis thaliana	core promoter element around -30 of transcription start
PmDXS1	TATA-box	ATATAA	865	+	Brassica oleracea	core promoter element around -30 of transcription start
PmDXS1	TATA-box	TATA	866	-	Arabidopsis thaliana	core promoter element around -30 of transcription start
PmDXS1	TATA-box	ATTATA	877	+	Brassica napus	core promoter element around -30 of transcription start
PmDXS1	TATA-box	TATAA	878	-	Arabidopsis thaliana	core promoter element around -30 of transcription start
PmDXS1	TATA-box	TATA	879	-	Arabidopsis thaliana	core promoter element around -30 of transcription start
PmDXS1	TATA-box	ATATAA	999	+	Brassica oleracea	core promoter element around -30 of transcription start
PmDXS1	TATA-box	TATA	1000	-	Arabidopsis thaliana	core promoter element around -30 of transcription start
PmDXS1	TATA-box	ATTATA	1152	+	Brassica napus	core promoter element around -30 of transcription start
PmDXS1	TATA-box	TATAA	1153	-	Arabidopsis thaliana	core promoter element around -30 of transcription start
PmDXS1	TATA-box	TATA	1154	-	Arabidopsis thaliana	core promoter element around -30 of transcription start
PmDXS1	TATA-box	ATTATA	1158	+	Brassica napus	core promoter element around -30 of transcription start
PmDXS1	TATA-box	TATAA	1159	-	Arabidopsis thaliana	core promoter element around -30 of transcription start
PmDXS1	TATA-box	TATA	1160	-	Arabidopsis thaliana	core promoter element around -30 of transcription start
PmDXS1	TATA-box	TACATAAA	1252	+	Oryza sativa	core promoter element around -30 of transcription start
PmDXS1	TATA-box	TATA	1311	-	Arabidopsis thaliana	core promoter element around -30 of transcription start
PmDXS1	TATA-box	TATA	1541	-	Arabidopsis thaliana	core promoter element around -30 of transcription start
PmDXS1	WRE3	CCACCT	98	-	Pisum sativum
PmDXS1	Myb	CAACTG	551	+	Arabidopsis thaliana
PmDXS1	GT1-motif	GGTTAAT	53	-	Avena sativa	light responsive element
PmDXS1	GT1-motif	GGTTAA	54	-	Arabidopsis thaliana	light responsive element
PmDXS1	GT1-motif	GGTTAA	123	+	Arabidopsis thaliana	light responsive element
PmDXS1	GT1-motif	GGTTAA	1529	+	Arabidopsis thaliana	light responsive element
PmDXS1	MYB	TAACCA	55	+	Arabidopsis thaliana
PmDXS1	MYB	TAACCA	122	-	Arabidopsis thaliana
PmDXS1	MYB	TAACCA	1528	-	Arabidopsis thaliana
PmDXS1	Unnamed__1	CGTGG	343	-	Zea mays
PmDXS1	TGA-element	AACGAC	1691	-	Brassica oleracea	auxin-responsive element
PmDXS2	ATCT-motif	AATCTAATCC	715	+	Pisum sativum	part of a conserved DNA module involved in light responsiveness
PmDXS2	AT~TATA-box	TATATA	541	-	Arabidopsis thaliana
PmDXS2	CAT-box	GCCACT	215	+	Arabidopsis thaliana	cis-acting regulatory element related to meristem expression
PmDXS2	CAT-box	GCCACT	637	+	Arabidopsis thaliana	cis-acting regulatory element related to meristem expression
PmDXS2		motif_sequence	199	+	organism	short_function
PmDXS2		motif_sequence	309	+	organism	short_function
PmDXS2		motif_sequence	502	+	organism	short_function
PmDXS2		motif_sequence	721	+	organism	short_function
PmDXS2	TATA	TATAAAAT	140	-	Arabidopsis thaliana
PmDXS2	MYC	CAATTG	693	-	Arabidopsis thaliana
PmDXS2	AT-rich element	ATAGAAATCAA	355	+	Glycine max	binding site of AT-rich DNA binding protein (ATBP-1)
PmDXS2	Unnamed__4	CTCC	1	+	Petroselinum hortense
PmDXS2	Unnamed__4	CTCC	34	+	Petroselinum hortense
PmDXS2	Unnamed__4	CTCC	118	+	Petroselinum hortense
PmDXS2	Unnamed__4	CTCC	184	+	Petroselinum hortense
PmDXS2	Unnamed__4	CTCC	192	+	Petroselinum hortense
PmDXS2	Unnamed__4	CTCC	195	+	Petroselinum hortense
PmDXS2	Unnamed__4	CTCC	336	+	Petroselinum hortense
PmDXS2	Unnamed__4	CTCC	340	+	Petroselinum hortense
PmDXS2	L-box	ATCCCACCTAC	678	+	Petroselinum crispum	part of a light responsive element
PmDXS2	GATA-motif	GATAGGA	185	-	Arabidopsis thaliana	part of a light responsive element
PmDXS2	GATA-motif	AAGATAAGATT	715	-	Arabidopsis thaliana	part of a light responsive element
PmDXS2	ARE	AAACCA	642	-	Zea mays	cis-acting regulatory element essential for the anaerobic induction
PmDXS2	CAAT-box	CAAT	86	-	Nicotiana glutinosa
PmDXS2	CAAT-box	CAAT	90	+	Nicotiana glutinosa
PmDXS2	CAAT-box	CAAT	155	-	Nicotiana glutinosa
PmDXS2	CAAT-box	CCAAT	206	+	Arabidopsis thaliana	common cis-acting element in promoter and enhancer regions
PmDXS2	CAAT-box	CAAT	207	+	Nicotiana glutinosa
PmDXS2	CAAT-box	CAAT	256	-	Nicotiana glutinosa
PmDXS2	CAAT-box	CAAT	261	-	Nicotiana glutinosa
PmDXS2	CAAT-box	CAAT	275	-	Nicotiana glutinosa
PmDXS2	CAAT-box	CCAAT	283	-	Arabidopsis thaliana	common cis-acting element in promoter and enhancer regions
PmDXS2	CAAT-box	CCAAT	374	-	Arabidopsis thaliana	common cis-acting element in promoter and enhancer regions
PmDXS2	CAAT-box	CAAT	381	-	Nicotiana glutinosa
PmDXS2	CAAT-box	CAAT	387	-	Nicotiana glutinosa
PmDXS2	CAAT-box	CAAT	425	-	Nicotiana glutinosa
PmDXS2	CAAT-box	CAAAT	439	-	Pisum sativum	common cis-acting element in promoter and enhancer regions
PmDXS2	CAAT-box	CAAT	614	+	Nicotiana glutinosa
PmDXS2	CAAT-box	CAAT	626	+	Nicotiana glutinosa
PmDXS2	CAAT-box	CAAT	693	+	Nicotiana glutinosa
PmDXS2	CAAT-box	CAAT	695	-	Nicotiana glutinosa
PmDXS2	CAAT-box	CAAT	714	+	Nicotiana glutinosa
PmDXS2	WRE3	CCACCT	128	+	Pisum sativum
PmDXS2	WRE3	CCACCT	550	+	Pisum sativum
PmDXS2	WRE3	CCACCT	681	+	Pisum sativum
PmDXS2	circadian	CAAAGATATC	700	+	Lycopersicon esculentum	cis-acting regulatory element involved in circadian control
PmDXS2	TATA-box	ATTATA	105	+	Brassica napus	core promoter element around -30 of transcription start
PmDXS2	TATA-box	TATAA	106	-	Arabidopsis thaliana	core promoter element around -30 of transcription start
PmDXS2	TATA-box	TATA	107	+	Arabidopsis thaliana	core promoter element around -30 of transcription start
PmDXS2	TATA-box	TATAAAA	141	-	Pisum sativum	core promoter element around -30 of transcription start
PmDXS2	TATA-box	TATAAA	142	-	Helianthus annuus	core promoter element around -30 of transcription start
PmDXS2	TATA-box	TATAA	143	-	Arabidopsis thaliana	core promoter element around -30 of transcription start
PmDXS2	TATA-box	TATA	144	+	Arabidopsis thaliana	core promoter element around -30 of transcription start
PmDXS2	TATA-box	TATAAATA	300	-	Daucus carota	core promoter element around -30 of transcription start
PmDXS2	TATA-box	TATAAAT	301	-	Brassica juncea	core promoter element around -30 of transcription start
PmDXS2	TATA-box	TATAAA	302	-	Helianthus annuus	core promoter element around -30 of transcription start
PmDXS2	TATA-box	TATAA	303	-	Arabidopsis thaliana	core promoter element around -30 of transcription start
PmDXS2	TATA-box	TATA	304	+	Arabidopsis thaliana	core promoter element around -30 of transcription start
PmDXS2	TATA-box	TATA	399	-	Arabidopsis thaliana	core promoter element around -30 of transcription start
PmDXS2	TATA-box	TATA	485	-	Arabidopsis thaliana	core promoter element around -30 of transcription start
PmDXS2	TATA-box	TATA	520	-	Arabidopsis thaliana	core promoter element around -30 of transcription start
PmDXS2	TATA-box	TATACA	539	-	Helianthus annuus	core promoter element around -30 of transcription start
PmDXS2	TATA-box	TATATA	541	-	Arabidopsis thaliana	core promoter element around -30 of transcription start
PmDXS2	TATA-box	ATATAA	542	+	Brassica oleracea	core promoter element around -30 of transcription start
PmDXS2	TATA-box	TATA	543	-	Arabidopsis thaliana	core promoter element around -30 of transcription start
PmDXS2	TATA-box	ATATAT	616	-	Brassica napus	core promoter element around -30 of transcription start
PmDXS2	TATA-box	TATA	617	-	Arabidopsis thaliana	core promoter element around -30 of transcription start
PmDXS2	TATA-box	TATAAAT	628	-	Brassica juncea	core promoter element around -30 of transcription start
PmDXS2	TATA-box	TATAAA	629	-	Helianthus annuus	core promoter element around -30 of transcription start
PmDXS2	TATA-box	TATAA	630	-	Arabidopsis thaliana	core promoter element around -30 of transcription start
PmDXS2	TATA-box	TATA	631	-	Arabidopsis thaliana	core promoter element around -30 of transcription start
PmDXS3	CCAAT-box	CAACGG	66	+	Hordeum vulgare	MYBHv1 binding site
PmDXS3	TATA-box	TATA	20	+	Arabidopsis thaliana	core promoter element around -30 of transcription start
PmDXS3	TATA-box	TATA	62	+	Arabidopsis thaliana	core promoter element around -30 of transcription start
PmDXS3	TATA-box	ATATAT	164	+	Brassica napus	core promoter element around -30 of transcription start
PmDXS3	TATA-box	TATATA	165	+	Arabidopsis thaliana	core promoter element around -30 of transcription start
PmDXS3	TATA-box	ATATAT	166	+	Brassica napus	core promoter element around -30 of transcription start
PmDXS3	TATA-box	TATA	167	+	Arabidopsis thaliana	core promoter element around -30 of transcription start
PmDXS3	TATA-box	TATAAA	407	-	Helianthus annuus	core promoter element around -30 of transcription start
PmDXS3	TATA-box	TATAA	408	-	Arabidopsis thaliana	core promoter element around -30 of transcription start
PmDXS3	TATA-box	TATA	409	+	Arabidopsis thaliana	core promoter element around -30 of transcription start
PmDXS3	TATA-box	TATACA	465	-	Helianthus annuus	core promoter element around -30 of transcription start
PmDXS3	TATA-box	TATATA	467	-	Arabidopsis thaliana	core promoter element around -30 of transcription start
PmDXS3	TATA-box	ATATAT	468	-	Brassica napus	core promoter element around -30 of transcription start
PmDXS3	TATA-box	TATATA	469	-	Arabidopsis thaliana	core promoter element around -30 of transcription start
PmDXS3	TATA-box	ATATAT	470	-	Brassica napus	core promoter element around -30 of transcription start
PmDXS3	TATA-box	TATA	471	-	Arabidopsis thaliana	core promoter element around -30 of transcription start
PmDXS3	TATA-box	TATA	511	-	Arabidopsis thaliana	core promoter element around -30 of transcription start
PmDXS3	TATA-box	TATA	531	-	Arabidopsis thaliana	core promoter element around -30 of transcription start
PmDXS3	TATA-box	TACAAAA	541	+	Oryza sativa	core promoter element around -30 of transcription start
PmDXS3	TATA-box	TATATA	765	-	Arabidopsis thaliana	core promoter element around -30 of transcription start
PmDXS3	TATA-box	ATATAA	766	+	Brassica oleracea	core promoter element around -30 of transcription start
PmDXS3	TATA-box	TATA	767	-	Arabidopsis thaliana	core promoter element around -30 of transcription start
PmDXS3	Myb-binding site	CAACAG	177	-	Nicotiana tabacum
PmDXS3	as-1	TGACG	322	-	Arabidopsis thaliana
PmDXS3	as-1	TGACG	711	-	Arabidopsis thaliana
PmDXS3	MYB	CAACAG	177	-	Arabidopsis thaliana
PmDXS3	MYB	TAACCA	204	+	Arabidopsis thaliana
PmDXS3	MYB	CAACCA	223	+	Arabidopsis thaliana
PmDXS3	MYB	CAACCA	580	+	Arabidopsis thaliana
PmDXS3	TGA-element	AACGAC	546	+	Brassica oleracea	auxin-responsive element
PmDXS3	MYC	CATTTG	495	+	Arabidopsis thaliana
PmDXS3	MYC	CATGTG	584	+	Arabidopsis thaliana
PmDXS3	MYC	CAATTG	811	-	Arabidopsis thaliana
PmDXS3	MYC	CAATTG	830	-	Arabidopsis thaliana
PmDXS3	TGACG-motif	TGACG	322	-	Hordeum vulgare	cis-acting regulatory element involved in the MeJA-responsiveness
PmDXS3	TGACG-motif	TGACG	711	-	Hordeum vulgare	cis-acting regulatory element involved in the MeJA-responsiveness
PmDXS3	CGTCA-motif	CGTCA	322	+	Hordeum vulgare	cis-acting regulatory element involved in the MeJA-responsiveness
PmDXS3	CGTCA-motif	CGTCA	711	+	Hordeum vulgare	cis-acting regulatory element involved in the MeJA-responsiveness
PmDXS3	AT~TATA-box	TATATA	165	+	Arabidopsis thaliana
PmDXS3	AT~TATA-box	TATATA	467	-	Arabidopsis thaliana
PmDXS3	AT~TATA-box	TATATA	469	-	Arabidopsis thaliana
PmDXS3	AT~TATA-box	TATATA	765	-	Arabidopsis thaliana
PmDXS3	Myc	TCTCTTA	606	-	Arabidopsis thaliana
PmDXS3	W box	TTGACC	136	+	Arabidopsis thaliana
PmDXS3		motif_sequence	34	-	organism	short_function
PmDXS3		motif_sequence	85	+	organism	short_function
PmDXS3		motif_sequence	94	+	organism	short_function
PmDXS3		motif_sequence	301	+	organism	short_function
PmDXS3		motif_sequence	565	+	organism	short_function
PmDXS3		motif_sequence	585	+	organism	short_function
PmDXS3		motif_sequence	822	+	organism	short_function
PmDXS3	TATA	TATAAAAT	20	+	Arabidopsis thaliana
PmDXS3	TCA-element	CCATCTTTTT	305	+	Nicotiana tabacum	cis-acting element involved in salicylic acid responsiveness
PmDXS3	CAAT-box	CAAT	12	-	Nicotiana glutinosa
PmDXS3	CAAT-box	CCAAT	40	+	Arabidopsis thaliana	common cis-acting element in promoter and enhancer regions
PmDXS3	CAAT-box	CAAT	41	+	Nicotiana glutinosa
PmDXS3	CAAT-box	CAAAT	75	+	Pisum sativum	common cis-acting element in promoter and enhancer regions
PmDXS3	CAAT-box	CAAT	83	+	Nicotiana glutinosa
PmDXS3	CAAT-box	CCAAT	91	+	Arabidopsis thaliana	common cis-acting element in promoter and enhancer regions
PmDXS3	CAAT-box	CAAT	92	+	Nicotiana glutinosa
PmDXS3	CAAT-box	CAAAT	249	+	Pisum sativum	common cis-acting element in promoter and enhancer regions
PmDXS3	CAAT-box	CAAT	487	+	Nicotiana glutinosa
PmDXS3	CAAT-box	CAAAT	496	-	Pisum sativum	common cis-acting element in promoter and enhancer regions
PmDXS3	CAAT-box	CCAAT	557	-	Arabidopsis thaliana	common cis-acting element in promoter and enhancer regions
PmDXS3	CAAT-box	CAAT	617	+	Nicotiana glutinosa
PmDXS3	CAAT-box	CAAT	683	-	Nicotiana glutinosa
PmDXS3	CAAT-box	CAAT	736	-	Nicotiana glutinosa
PmDXS3	CAAT-box	CAAT	744	-	Nicotiana glutinosa
PmDXS3	CAAT-box	CAAT	794	+	Nicotiana glutinosa
PmDXS3	CAAT-box	CAAT	811	+	Nicotiana glutinosa
PmDXS3	CAAT-box	CAAT	813	-	Nicotiana glutinosa
PmDXS3	CAAT-box	CAAT	830	+	Nicotiana glutinosa
PmDXS3	CAAT-box	CAAT	832	-	Nicotiana glutinosa
PmDXS3	CAAT-box	CCAAT	851	+	Arabidopsis thaliana	common cis-acting element in promoter and enhancer regions
PmDXS3	CAAT-box	CAAT	852	+	Nicotiana glutinosa
PmDXS3	CAAT-box	CAAT	856	+	Nicotiana glutinosa
PmDXS3	G-box	CACGTG	453	-	Arabidopsis thaliana	cis-acting regulatory element involved in light responsiveness
PmDXS3	G-Box	CACGTG	453	-	Pisum sativum	cis-acting regulatory element involved in light responsiveness
PmDXS3	Box 4	ATTAAT	233	+	Petroselinum crispum	part of a conserved DNA module involved in light responsiveness
PmDXS3	Unnamed__4	CTCC	527	-	Petroselinum hortense
PmDXS3	Unnamed__4	CTCC	662	+	Petroselinum hortense
PmDXS3	Unnamed__4	CTCC	773	-	Petroselinum hortense
PmDXS3	ABRE	CACGTG	453	-	Arabidopsis thaliana	cis-acting element involved in the abscisic acid responsiveness
PmDXS3	ABRE	ACGTG	454	+	Arabidopsis thaliana	cis-acting element involved in the abscisic acid responsiveness
PmDXS3	MYB-like sequence	TAACCA	204	+	Arabidopsis thaliana
PmDXS3	MRE	AACCTAA	627	-	Petroselinum crispum	MYB binding site involved in light responsiveness
PmDXS3	MYB recognition site	CCGTTG	66	-	Arabidopsis thaliana
PmDXS3	CAT-box	GCCACT	777	+	Arabidopsis thaliana	cis-acting regulatory element related to meristem expression
PmHDR1	TCA	TCATCTTCAT	562	+	Pisum sativum
PmHDR1	CAT-box	GCCACT	165	+	Arabidopsis thaliana	cis-acting regulatory element related to meristem expression
PmHDR1	ACE	CTAACGTATT	495	-	Petroselinum crispum	cis-acting element involved in light responsiveness
PmHDR1	MYB-like sequence	TAACCA	116	-	Arabidopsis thaliana
PmHDR1	Unnamed__4	CTCC	240	+	Petroselinum hortense
PmHDR1	Unnamed__4	CTCC	312	-	Petroselinum hortense
PmHDR1	Unnamed__4	CTCC	683	+	Petroselinum hortense
PmHDR1	Unnamed__4	CTCC	947	+	Petroselinum hortense
PmHDR1	ABRE	ACGTG	113	+	Arabidopsis thaliana	cis-acting element involved in the abscisic acid responsiveness
PmHDR1	ABRE	ACGTG	1126	-	Arabidopsis thaliana	cis-acting element involved in the abscisic acid responsiveness
PmHDR1	G-Box	CACGTT	1126	+	Pisum sativum	cis-acting regulatory element involved in light responsiveness
PmHDR1	Box 4	ATTAAT	182	+	Petroselinum crispum	part of a conserved DNA module involved in light responsiveness
PmHDR1	G-box	CACGTC	112	-	Zea mays	cis-acting regulatory element involved in light responsiveness
PmHDR1	G-box	CAGACGTGGCA	1139	+	Nicotiana plumbaginifolia	cis-acting regulatory element involved in light responsiveness
PmHDR1	STRE	AGGGG	826	-	Arabidopsis thaliana
PmHDR1	STRE	AGGGG	1054	-	Arabidopsis thaliana
PmHDR1	TCA-element	CCATCTTTTT	582	-	Nicotiana tabacum	cis-acting element involved in salicylic acid responsiveness
PmHDR1	TCA-element	CCATCTTTTT	1209	+	Nicotiana tabacum	cis-acting element involved in salicylic acid responsiveness
PmHDR1	TCA-element	TCAGAAGAGG	1237	-	Brassica oleracea	cis-acting element involved in salicylic acid responsiveness
PmHDR1	CAAT-box	CAAAT	6	+	Pisum sativum	common cis-acting element in promoter and enhancer regions
PmHDR1	CAAT-box	CAAAT	50	+	Pisum sativum	common cis-acting element in promoter and enhancer regions
PmHDR1	CAAT-box	CAAT	94	+	Nicotiana glutinosa
PmHDR1	CAAT-box	CAAT	158	+	Nicotiana glutinosa
PmHDR1	CAAT-box	CAAT	176	+	Nicotiana glutinosa
PmHDR1	CAAT-box	CAAAT	231	+	Pisum sativum	common cis-acting element in promoter and enhancer regions
PmHDR1	CAAT-box	CCAAT	269	+	Arabidopsis thaliana	common cis-acting element in promoter and enhancer regions
PmHDR1	CAAT-box	CAAT	270	+	Nicotiana glutinosa
PmHDR1	CAAT-box	CCAAT	272	-	Arabidopsis thaliana	common cis-acting element in promoter and enhancer regions
PmHDR1	CAAT-box	CAAT	366	-	Nicotiana glutinosa
PmHDR1	CAAT-box	CAAT	520	-	Nicotiana glutinosa
PmHDR1	CAAT-box	CAAT	540	-	Nicotiana glutinosa
PmHDR1	CAAT-box	CAAT	569	+	Nicotiana glutinosa
PmHDR1	CAAT-box	CAAAT	571	-	Pisum sativum	common cis-acting element in promoter and enhancer regions
PmHDR1	CAAT-box	CAAT	588	-	Nicotiana glutinosa
PmHDR1	CAAT-box	CAAT	593	-	Nicotiana glutinosa
PmHDR1	CAAT-box	CAAT	749	+	Nicotiana glutinosa
PmHDR1	CAAT-box	CAAAT	799	+	Pisum sativum	common cis-acting element in promoter and enhancer regions
PmHDR1	CAAT-box	CAAT	809	+	Nicotiana glutinosa
PmHDR1	CAAT-box	CAAT	843	+	Nicotiana glutinosa
PmHDR1	CAAT-box	CAAT	975	+	Nicotiana glutinosa
PmHDR1	CAAT-box	CAAT	1038	+	Nicotiana glutinosa
PmHDR1	CAAT-box	CAAT	1209	+	Nicotiana glutinosa
PmHDR1	CAAT-box	CAAT	1231	+	Nicotiana glutinosa
PmHDR1	circadian	CAAAGATATC	470	+	Lycopersicon esculentum	cis-acting regulatory element involved in circadian control
PmHDR1	circadian	CAAAGATATC	740	+	Lycopersicon esculentum	cis-acting regulatory element involved in circadian control
PmHDR1		motif_sequence	56	-	organism	short_function
PmHDR1		motif_sequence	312	-	organism	short_function
PmHDR1		motif_sequence	382	-	organism	short_function
PmHDR1		motif_sequence	547	-	organism	short_function
PmHDR1		motif_sequence	564	+	organism	short_function
PmHDR1		motif_sequence	894	+	organism	short_function
PmHDR1		motif_sequence	1169	-	organism	short_function
PmHDR1		motif_sequence	1238	+	organism	short_function
PmHDR1	AT~TATA-box	TATATA	883	-	Arabidopsis thaliana
PmHDR1	MYC	CATTTG	231	-	Arabidopsis thaliana
PmHDR1	MYC	CAATTG	270	+	Arabidopsis thaliana
PmHDR1	TGACG-motif	TGACG	111	+	Hordeum vulgare	cis-acting regulatory element involved in the MeJA-responsiveness
PmHDR1	CGTCA-motif	CGTCA	111	-	Hordeum vulgare	cis-acting regulatory element involved in the MeJA-responsiveness
PmHDR1	Box III	atCATTTTCACt	1211	+	Pisum sativum	protein binding site
PmHDR1	TGA-element	AACGAC	1066	-	Brassica oleracea	auxin-responsive element
PmHDR1	TGA-element	AACGAC	1154	+	Brassica oleracea	auxin-responsive element
PmHDR1	Unnamed__1	CGTGG	114	+	Zea mays
PmHDR1	Unnamed__1	CGTGG	1125	-	Zea mays
PmHDR1	as-1	TGACG	111	+	Arabidopsis thaliana
PmHDR1	MYB	TAACCA	116	-	Arabidopsis thaliana
PmHDR1	MYB	CAACCA	1135	+	Arabidopsis thaliana
PmHDR1	MYB	CAACAG	1264	-	Arabidopsis thaliana
PmHDR1	GARE-motif	TCTGTTG	1263	+	Brassica oleracea	gibberellin-responsive element
PmHDR1	Myb-binding site	CAACAG	1264	-	Nicotiana tabacum
PmHDR1	GT1-motif	GGTTAA	117	+	Arabidopsis thaliana	light responsive element
PmHDR1	Myb	TAACTG	1106	+	Arabidopsis thaliana
PmHDR1	TATA-box	TATTTAAA	250	-	Arabidopsis thaliana	core promoter element around -30 of transcription start
PmHDR1	TATA-box	TACAAAA	375	+	Oryza sativa	core promoter element around -30 of transcription start
PmHDR1	TATA-box	TATAA	430	-	Arabidopsis thaliana	core promoter element around -30 of transcription start
PmHDR1	TATA-box	TATA	431	+	Arabidopsis thaliana	core promoter element around -30 of transcription start
PmHDR1	TATA-box	TATA	649	-	Arabidopsis thaliana	core promoter element around -30 of transcription start
PmHDR1	TATA-box	TATTTAAA	687	-	Arabidopsis thaliana	core promoter element around -30 of transcription start
PmHDR1	TATA-box	TATTTAAA	700	-	Arabidopsis thaliana	core promoter element around -30 of transcription start
PmHDR1	TATA-box	TATA	794	-	Arabidopsis thaliana	core promoter element around -30 of transcription start
PmHDR1	TATA-box	TATATA	883	-	Arabidopsis thaliana	core promoter element around -30 of transcription start
PmHDR1	TATA-box	ATATAT	884	-	Brassica napus	core promoter element around -30 of transcription start
PmHDR1	TATA-box	TATA	885	-	Arabidopsis thaliana	core promoter element around -30 of transcription start
PmHDR1	TATA-box	TATACA	1110	-	Helianthus annuus	core promoter element around -30 of transcription start
PmHDR1	TATA-box	TATA	1112	-	Arabidopsis thaliana	core promoter element around -30 of transcription start
PmHDR2	GCN4_motif	TGAGTCA	332	-	Oryza sativa	cis-regulatory element involved in endosperm expression
PmHDR2	MYC	CATTTG	118	+	Arabidopsis thaliana
PmHDR2	MYC	CATTTG	433	+	Arabidopsis thaliana
PmHDR2	MYC	CAATTG	721	-	Arabidopsis thaliana
PmHDR2	ATC-motif	AGTAATCT	562	+	Spinacia oleracea	part of a conserved DNA module involved in light responsiveness
PmHDR2	CTAG-motif	ACTAGCAGAA	680	-	Avena sativa
PmHDR2	Unnamed__4	CTCC	4	-	Petroselinum hortense
PmHDR2	Unnamed__4	CTCC	19	-	Petroselinum hortense
PmHDR2	Unnamed__4	CTCC	45	-	Petroselinum hortense
PmHDR2	Unnamed__4	CTCC	210	-	Petroselinum hortense
PmHDR2	Unnamed__4	CTCC	227	+	Petroselinum hortense
PmHDR2	Unnamed__4	CTCC	522	+	Petroselinum hortense
PmHDR2	Unnamed__4	CTCC	554	+	Petroselinum hortense
PmHDR2	ATCT-motif	AATCTAATCC	565	+	Pisum sativum	part of a conserved DNA module involved in light responsiveness
PmHDR2		motif_sequence	33	+	organism	short_function
PmHDR2		motif_sequence	278	+	organism	short_function
PmHDR2		motif_sequence	403	-	organism	short_function
PmHDR2		motif_sequence	755	+	organism	short_function
PmHDR2	CAT-box	GCCACT	500	-	Arabidopsis thaliana	cis-acting regulatory element related to meristem expression
PmHDR2	CAT-box	GCCACT	602	-	Arabidopsis thaliana	cis-acting regulatory element related to meristem expression
PmHDR2	WRE3	CCACCT	547	-	Pisum sativum
PmHDR2	Myb	CAACTG	40	+	Arabidopsis thaliana
PmHDR2	TATA-box	TATAAGAA	443	-	Zea mays	core promoter element around -30 of transcription start
PmHDR2	TATA-box	TATAA	446	-	Arabidopsis thaliana	core promoter element around -30 of transcription start
PmHDR2	TATA-box	TATA	447	-	Arabidopsis thaliana	core promoter element around -30 of transcription start
PmHDR2	TATA-box	TATA	486	-	Arabidopsis thaliana	core promoter element around -30 of transcription start
PmHDR2	TATA-box	TATA	538	-	Arabidopsis thaliana	core promoter element around -30 of transcription start
PmHDR2	CAAT-box	CAAAT	119	-	Pisum sativum	common cis-acting element in promoter and enhancer regions
PmHDR2	CAAT-box	CAAT	150	-	Nicotiana glutinosa
PmHDR2	CAAT-box	CAAT	179	+	Nicotiana glutinosa
PmHDR2	CAAT-box	CAAAT	203	-	Pisum sativum	common cis-acting element in promoter and enhancer regions
PmHDR2	CAAT-box	CAAAT	267	-	Pisum sativum	common cis-acting element in promoter and enhancer regions
PmHDR2	CAAT-box	CAAAT	434	-	Pisum sativum	common cis-acting element in promoter and enhancer regions
PmHDR2	CAAT-box	CAAAT	492	+	Pisum sativum	common cis-acting element in promoter and enhancer regions
PmHDR2	CAAT-box	CAAAT	625	-	Pisum sativum	common cis-acting element in promoter and enhancer regions
PmHDR2	CAAT-box	CAAT	653	-	Nicotiana glutinosa
PmHDR2	CAAT-box	CAAT	687	-	Nicotiana glutinosa
PmHDR2	CAAT-box	CAAT	702	-	Nicotiana glutinosa
PmHDR2	CAAT-box	CCAAT	720	+	Arabidopsis thaliana	common cis-acting element in promoter and enhancer regions
PmHDR2	CAAT-box	CAAT	721	+	Nicotiana glutinosa
PmHDR2	CAAT-box	CAAT	723	-	Nicotiana glutinosa
PmHDR2	CAAT-box	CAAAT	735	-	Pisum sativum	common cis-acting element in promoter and enhancer regions
PmHDR2	CAAT-box	CAAT	787	+	Nicotiana glutinosa
PmHDR2	MBS	CAACTG	40	+	Arabidopsis thaliana	MYB binding site involved in drought-inducibility
PmHDR2	STRE	AGGGG	106	-	Arabidopsis thaliana
PmHDR2	Box 4	ATTAAT	146	+	Petroselinum crispum	part of a conserved DNA module involved in light responsiveness
PmHDR2	Box 4	ATTAAT	300	+	Petroselinum crispum	part of a conserved DNA module involved in light responsiveness
PmHDR2	Box 4	ATTAAT	468	-	Petroselinum crispum	part of a conserved DNA module involved in light responsiveness
PmHDR2	Box 4	ATTAAT	643	-	Petroselinum crispum	part of a conserved DNA module involved in light responsiveness
PmHDR2	ARE	AAACCA	478	-	Zea mays	cis-acting regulatory element essential for the anaerobic induction
PmIPPI	G-box	CACGAC	52	+	Zea mays	cis-acting regulatory element involved in light responsiveness
PmIPPI	G-box	CACGAC	141	+	Zea mays	cis-acting regulatory element involved in light responsiveness
PmIPPI	G-box	CACGTG	227	+	Arabidopsis thaliana	cis-acting regulatory element involved in light responsiveness
PmIPPI	STRE	AGGGG	313	+	Arabidopsis thaliana
PmIPPI	TATC-box	TATCCCA	67	+	Oryza sativa	cis-acting element involved in gibberellin-responsiveness
PmIPPI	CAAT-box	CCAAT	78	+	Arabidopsis thaliana	common cis-acting element in promoter and enhancer regions
PmIPPI	CAAT-box	CAAT	79	+	Nicotiana glutinosa
PmIPPI	CAAT-box	CAAAT	250	+	Pisum sativum	common cis-acting element in promoter and enhancer regions
PmIPPI	CAAT-box	CAAAT	329	+	Pisum sativum	common cis-acting element in promoter and enhancer regions
PmIPPI	CAAT-box	CAAT	345	-	Nicotiana glutinosa
PmIPPI	CAAT-box	CAAT	359	+	Nicotiana glutinosa
PmIPPI	CAAT-box	CCAAT	386	+	Arabidopsis thaliana	common cis-acting element in promoter and enhancer regions
PmIPPI	CAAT-box	CAAT	387	+	Nicotiana glutinosa
PmIPPI	CAAT-box	CCAAT	389	-	Arabidopsis thaliana	common cis-acting element in promoter and enhancer regions
PmIPPI	CAAT-box	CCAAT	394	-	Arabidopsis thaliana	common cis-acting element in promoter and enhancer regions
PmIPPI	CAAT-box	CAAT	522	-	Nicotiana glutinosa
PmIPPI	TATA-box	TATA	156	+	Arabidopsis thaliana	core promoter element around -30 of transcription start
PmIPPI	TATA-box	TATTTAAA	376	+	Arabidopsis thaliana	core promoter element around -30 of transcription start
PmIPPI	TATA-box	TATATAA	441	-	Arabidopsis thaliana	core promoter element around -30 of transcription start
PmIPPI	TATA-box	TATATA	442	-	Arabidopsis thaliana	core promoter element around -30 of transcription start
PmIPPI	TATA-box	TATA	444	-	Arabidopsis thaliana	core promoter element around -30 of transcription start
PmIPPI	TATA-box	TACATAAA	446	+	Oryza sativa	core promoter element around -30 of transcription start
PmIPPI	TATA-box	ATATAT	453	-	Brassica napus	core promoter element around -30 of transcription start
PmIPPI	TATA-box	TATA	454	-	Arabidopsis thaliana	core promoter element around -30 of transcription start
PmIPPI	TATA-box	TATA	541	-	Arabidopsis thaliana	core promoter element around -30 of transcription start
PmIPPI	ARE	AAACCA	172	-	Zea mays	cis-acting regulatory element essential for the anaerobic induction
PmIPPI	G-Box	CACGTG	227	+	Pisum sativum	cis-acting regulatory element involved in light responsiveness
PmIPPI	WUN-motif	AAATTTCTT	251	+	Nicotiana glutinosa
PmIPPI	MYB	TAACCA	246	+	Arabidopsis thaliana
PmIPPI	Unnamed__1	CGTGG	307	-	Zea mays
PmIPPI	Unnamed__4	CTCC	179	+	Petroselinum hortense
PmIPPI	Unnamed__4	CTCC	202	+	Petroselinum hortense
PmIPPI	ABRE	CACGTG	227	+	Arabidopsis thaliana	cis-acting element involved in the abscisic acid responsiveness
PmIPPI	ABRE	ACGTG	228	+	Arabidopsis thaliana	cis-acting element involved in the abscisic acid responsiveness
PmIPPI	MYC	CATTTG	329	-	Arabidopsis thaliana
PmIPPI	MYC	CAATTG	387	-	Arabidopsis thaliana
PmIPPI	MYC	CATGTG	493	-	Arabidopsis thaliana
PmIPPI		motif_sequence	47	+	organism	short_function
PmIPPI		motif_sequence	498	-	organism	short_function
PmIPPI	TATA	TATAAAAT	541	+	Arabidopsis thaliana
PmIPPI	W box	TTGACC	218	-	Arabidopsis thaliana
PmIPPI	W box	TTGACC	259	+	Arabidopsis thaliana
PmIPPI	MYB-like sequence	TAACCA	246	+	Arabidopsis thaliana
PmIPPI	AT~TATA-box	TATATA	442	-	Arabidopsis thaliana
PmMCT	AT~TATA-box	TATATA	291	-	Arabidopsis thaliana
PmMCT	AT~TATA-box	TATATA	298	-	Arabidopsis thaliana
PmMCT	AT~TATA-box	TATATA	300	-	Arabidopsis thaliana
PmMCT	TCT-motif	TCTTAC	401	+	Arabidopsis thaliana	part of a light responsive element
PmMCT	W box	TTGACC	329	-	Arabidopsis thaliana
PmMCT	Box 4	ATTAAT	79	+	Petroselinum crispum	part of a conserved DNA module involved in light responsiveness
PmMCT	Box 4	ATTAAT	88	+	Petroselinum crispum	part of a conserved DNA module involved in light responsiveness
PmMCT	Box 4	ATTAAT	127	+	Petroselinum crispum	part of a conserved DNA module involved in light responsiveness
PmMCT	Box 4	ATTAAT	160	+	Petroselinum crispum	part of a conserved DNA module involved in light responsiveness
PmMCT	Box 4	ATTAAT	166	+	Petroselinum crispum	part of a conserved DNA module involved in light responsiveness
PmMCT		motif_sequence	48	-	organism	short_function
PmMCT		motif_sequence	454	+	organism	short_function
PmMCT		motif_sequence	548	-	organism	short_function
PmMCT	TCCC-motif	TCTCCCT	546	-	Spinacia oleracea	part of a light responsive element
PmMCT	TATA-box	ATATAT	116	+	Brassica napus	core promoter element around -30 of transcription start
PmMCT	TATA-box	TATA	117	+	Arabidopsis thaliana	core promoter element around -30 of transcription start
PmMCT	TATA-box	ATATAA	196	+	Brassica oleracea	core promoter element around -30 of transcription start
PmMCT	TATA-box	TATA	197	+	Arabidopsis thaliana	core promoter element around -30 of transcription start
PmMCT	TATA-box	ATTATA	253	+	Brassica napus	core promoter element around -30 of transcription start
PmMCT	TATA-box	TATAA	254	-	Arabidopsis thaliana	core promoter element around -30 of transcription start
PmMCT	TATA-box	TATA	255	+	Arabidopsis thaliana	core promoter element around -30 of transcription start
PmMCT	TATA-box	ATATAA	285	+	Brassica oleracea	core promoter element around -30 of transcription start
PmMCT	TATA-box	TATA	286	+	Arabidopsis thaliana	core promoter element around -30 of transcription start
PmMCT	TATA-box	ATATAT	290	-	Brassica napus	core promoter element around -30 of transcription start
PmMCT	TATA-box	TATATA	291	-	Arabidopsis thaliana	core promoter element around -30 of transcription start
PmMCT	TATA-box	ATATAT	292	-	Brassica napus	core promoter element around -30 of transcription start
PmMCT	TATA-box	TATA	293	-	Arabidopsis thaliana	core promoter element around -30 of transcription start
PmMCT	TATA-box	ATTATA	296	+	Brassica napus	core promoter element around -30 of transcription start
PmMCT	TATA-box	TATATAA	297	-	Arabidopsis thaliana	core promoter element around -30 of transcription start
PmMCT	TATA-box	TATATA	298	-	Arabidopsis thaliana	core promoter element around -30 of transcription start
PmMCT	TATA-box	ATATAT	299	-	Brassica napus	core promoter element around -30 of transcription start
PmMCT	TATA-box	TATATA	300	-	Arabidopsis thaliana	core promoter element around -30 of transcription start
PmMCT	TATA-box	ATATAA	301	+	Brassica oleracea	core promoter element around -30 of transcription start
PmMCT	TATA-box	TATA	302	-	Arabidopsis thaliana	core promoter element around -30 of transcription start
PmMCT	TATA-box	TATA	341	-	Arabidopsis thaliana	core promoter element around -30 of transcription start
PmMCT	CAAT-box	CAAAT	15	+	Pisum sativum	common cis-acting element in promoter and enhancer regions
PmMCT	CAAT-box	CAAT	35	+	Nicotiana glutinosa
PmMCT	CAAT-box	CAAT	39	+	Nicotiana glutinosa
PmMCT	CAAT-box	CAAT	70	-	Nicotiana glutinosa
PmMCT	CAAT-box	CAAAT	94	-	Pisum sativum	common cis-acting element in promoter and enhancer regions
PmMCT	CAAT-box	CAAAT	151	+	Pisum sativum	common cis-acting element in promoter and enhancer regions
PmMCT	CAAT-box	CAAT	349	+	Nicotiana glutinosa
PmMCT	CAAT-box	CAAT	406	+	Nicotiana glutinosa
PmMCT	CAAT-box	CAAT	408	-	Nicotiana glutinosa
PmMCT	CAAT-box	CAAT	430	+	Nicotiana glutinosa
PmMCT	CAAT-box	CAAAT	435	+	Pisum sativum	common cis-acting element in promoter and enhancer regions
PmMCT	CAAT-box	CCAAT	459	+	Arabidopsis thaliana	common cis-acting element in promoter and enhancer regions
PmMCT	CAAT-box	CAAT	460	+	Nicotiana glutinosa
PmMCT	MYC	CAATTG	406	-	Arabidopsis thaliana
PmMCT	O2-site	GATGA(C/T)(A/G)TG(A/G)	556	+	Zea mays	cis-acting regulatory element involved in zein metabolism regulation
PmMCT	Unnamed__4	CTCC	449	-	Petroselinum hortense
PmMCT	Unnamed__4	CTCC	475	+	Petroselinum hortense
PmMCT	Unnamed__4	CTCC	548	-	Petroselinum hortense
PmMDS	box S	AGCCACC	429	-	Arabidopsis thaliana
PmMDS	CAAT-box	CCAAT	64	-	Arabidopsis thaliana	common cis-acting element in promoter and enhancer regions
PmMDS	CAAT-box	CAAT	107	-	Nicotiana glutinosa
PmMDS	CAAT-box	CAAT	112	-	Nicotiana glutinosa
PmMDS	CAAT-box	CCAAT	145	-	Arabidopsis thaliana	common cis-acting element in promoter and enhancer regions
PmMDS	CAAT-box	CCAAT	185	-	Arabidopsis thaliana	common cis-acting element in promoter and enhancer regions
PmMDS	CAAT-box	CAAT	272	-	Nicotiana glutinosa
PmMDS	CAAT-box	CAAT	294	-	Nicotiana glutinosa
PmMDS	CAAT-box	CAAT	351	+	Nicotiana glutinosa
PmMDS	CAAT-box	CAAT	376	+	Nicotiana glutinosa
PmMDS	CAAT-box	CAAAT	395	-	Pisum sativum	common cis-acting element in promoter and enhancer regions
PmMDS	CAAT-box	CAAAT	416	+	Pisum sativum	common cis-acting element in promoter and enhancer regions
PmMDS	CAAT-box	CAAT	425	+	Nicotiana glutinosa
PmMDS	CAAT-box	CAAT	532	+	Nicotiana glutinosa
PmMDS	CAAT-box	CAAT	659	+	Nicotiana glutinosa
PmMDS	CAAT-box	CAAAT	769	-	Pisum sativum	common cis-acting element in promoter and enhancer regions
PmMDS	CAAT-box	CAAT	774	-	Nicotiana glutinosa
PmMDS	CAAT-box	CAAT	829	-	Nicotiana glutinosa
PmMDS	CAAT-box	CAAT	897	-	Nicotiana glutinosa
PmMDS	CAAT-box	CAAT	940	+	Nicotiana glutinosa
PmMDS	CAAT-box	CAAAT	1016	+	Pisum sativum	common cis-acting element in promoter and enhancer regions
PmMDS	CAAT-box	CCAAT	1027	-	Arabidopsis thaliana	common cis-acting element in promoter and enhancer regions
PmMDS	CAAT-box	CAAAT	1091	+	Pisum sativum	common cis-acting element in promoter and enhancer regions
PmMDS	CAAT-box	CAAT	1102	-	Nicotiana glutinosa
PmMDS	CAAT-box	CAAT	1159	-	Nicotiana glutinosa
PmMDS	CAAT-box	CAAT	1205	+	Nicotiana glutinosa
PmMDS	CAAT-box	CAAT	1222	+	Nicotiana glutinosa
PmMDS	CAAT-box	CAAT	1270	+	Nicotiana glutinosa
PmMDS	CAAT-box	CAAT	1319	+	Nicotiana glutinosa
PmMDS	CAAT-box	CAAT	1344	-	Nicotiana glutinosa
PmMDS	CAAT-box	CAAT	1414	-	Nicotiana glutinosa
PmMDS	STRE	AGGGG	117	+	Arabidopsis thaliana
PmMDS	STRE	AGGGG	362	-	Arabidopsis thaliana
PmMDS	Y-box	TGTGGAGGAGCA	66	+	Lemna gibba	?
PmMDS	Box 4	ATTAAT	378	+	Petroselinum crispum	part of a conserved DNA module involved in light responsiveness
PmMDS	Box 4	ATTAAT	1117	-	Petroselinum crispum	part of a conserved DNA module involved in light responsiveness
PmMDS	Unnamed__4	CTCC	69	-	Petroselinum hortense
PmMDS	Unnamed__4	CTCC	72	-	Petroselinum hortense
PmMDS	Unnamed__4	CTCC	188	-	Petroselinum hortense
PmMDS	Unnamed__4	CTCC	191	-	Petroselinum hortense
PmMDS	Unnamed__4	CTCC	265	-	Petroselinum hortense
PmMDS	Unnamed__4	CTCC	287	-	Petroselinum hortense
PmMDS	Unnamed__4	CTCC	320	-	Petroselinum hortense
PmMDS	Unnamed__4	CTCC	413	+	Petroselinum hortense
PmMDS	Unnamed__4	CTCC	434	+	Petroselinum hortense
PmMDS	Unnamed__4	CTCC	440	-	Petroselinum hortense
PmMDS	Unnamed__4	CTCC	476	-	Petroselinum hortense
PmMDS	Unnamed__4	CTCC	919	-	Petroselinum hortense
PmMDS	Unnamed__4	CTCC	1013	+	Petroselinum hortense
PmMDS	Unnamed__4	CTCC	1088	+	Petroselinum hortense
PmMDS	Unnamed__4	CTCC	1137	-	Petroselinum hortense
PmMDS	Unnamed__4	CTCC	1243	+	Petroselinum hortense
PmMDS	Unnamed__4	CTCC	1454	+	Petroselinum hortense
PmMDS	MYB-like sequence	TAACCA	147	-	Arabidopsis thaliana
PmMDS	MYB-like sequence	TAACCA	698	+	Arabidopsis thaliana
PmMDS	MYB-like sequence	TAACCA	1309	+	Arabidopsis thaliana
PmMDS	CAT-box	GCCACT	195	+	Arabidopsis thaliana	cis-acting regulatory element related to meristem expression
PmMDS	Unnamed__6	taTAAATATct	807	-	Zea mays
PmMDS	Unnamed__6	taTAAATATct	955	+	Zea mays
PmMDS	TATA-box	ccTATAAAaa	59	-	Arabidopsis thaliana	core promoter element around -30 of transcription start
PmMDS	TATA-box	ATTATA	546	+	Brassica napus	core promoter element around -30 of transcription start
PmMDS	TATA-box	TATAA	547	-	Arabidopsis thaliana	core promoter element around -30 of transcription start
PmMDS	TATA-box	TATA	548	+	Arabidopsis thaliana	core promoter element around -30 of transcription start
PmMDS	TATA-box	TATAA	605	-	Arabidopsis thaliana	core promoter element around -30 of transcription start
PmMDS	TATA-box	TATA	606	+	Arabidopsis thaliana	core promoter element around -30 of transcription start
PmMDS	TATA-box	TATATA	616	+	Arabidopsis thaliana	core promoter element around -30 of transcription start
PmMDS	TATA-box	ATATAT	617	+	Brassica napus	core promoter element around -30 of transcription start
PmMDS	TATA-box	TATATA	618	+	Arabidopsis thaliana	core promoter element around -30 of transcription start
PmMDS	TATA-box	ATATAT	619	+	Brassica napus	core promoter element around -30 of transcription start
PmMDS	TATA-box	TATATA	620	+	Arabidopsis thaliana	core promoter element around -30 of transcription start
PmMDS	TATA-box	TATA	622	+	Arabidopsis thaliana	core promoter element around -30 of transcription start
PmMDS	TATA-box	ATATAA	661	+	Brassica oleracea	core promoter element around -30 of transcription start
PmMDS	TATA-box	TATA	662	+	Arabidopsis thaliana	core promoter element around -30 of transcription start
PmMDS	TATA-box	TATACA	741	-	Helianthus annuus	core promoter element around -30 of transcription start
PmMDS	TATA-box	TATATA	743	-	Arabidopsis thaliana	core promoter element around -30 of transcription start
PmMDS	TATA-box	TATA	745	-	Arabidopsis thaliana	core promoter element around -30 of transcription start
PmMDS	TATA-box	TACAAAA	747	+	Oryza sativa	core promoter element around -30 of transcription start
PmMDS	TATA-box	TATATA	788	-	Arabidopsis thaliana	core promoter element around -30 of transcription start
PmMDS	TATA-box	ATATAT	789	-	Brassica napus	core promoter element around -30 of transcription start
PmMDS	TATA-box	TATATA	790	-	Arabidopsis thaliana	core promoter element around -30 of transcription start
PmMDS	TATA-box	ATATAT	791	-	Brassica napus	core promoter element around -30 of transcription start
PmMDS	TATA-box	TATATA	792	-	Arabidopsis thaliana	core promoter element around -30 of transcription start
PmMDS	TATA-box	TATA	794	-	Arabidopsis thaliana	core promoter element around -30 of transcription start
PmMDS	TATA-box	TATATA	800	-	Arabidopsis thaliana	core promoter element around -30 of transcription start
PmMDS	TATA-box	ATATAT	801	-	Brassica napus	core promoter element around -30 of transcription start
PmMDS	TATA-box	TATATA	802	-	Arabidopsis thaliana	core promoter element around -30 of transcription start
PmMDS	TATA-box	TATA	804	-	Arabidopsis thaliana	core promoter element around -30 of transcription start
PmMDS	TATA-box	TATAAA	901	-	Helianthus annuus	core promoter element around -30 of transcription start
PmMDS	TATA-box	TATAA	902	-	Arabidopsis thaliana	core promoter element around -30 of transcription start
PmMDS	TATA-box	TATA	903	-	Arabidopsis thaliana	core promoter element around -30 of transcription start
PmMDS	TATA-box	TATACA	953	-	Helianthus annuus	core promoter element around -30 of transcription start
PmMDS	TATA-box	TATA	955	-	Arabidopsis thaliana	core promoter element around -30 of transcription start
PmMDS	GT1-motif	GGTTAA	852	+	Arabidopsis thaliana	light responsive element
PmMDS	AuxRR-core	GGTCCAT	255	-	Nicotiana tabacum	cis-acting regulatory element involved in auxin responsiveness
PmMDS	MYB	TAACCA	147	-	Arabidopsis thaliana
PmMDS	MYB	TAACCA	698	+	Arabidopsis thaliana
PmMDS	MYB	CAACCA	1177	-	Arabidopsis thaliana
PmMDS	MYB	TAACCA	1309	+	Arabidopsis thaliana
PmMDS	LTR	CCGAAA	1245	+	Hordeum vulgare	cis-acting element involved in low-temperature responsiveness
PmMDS	GATA-motif	AAGGATAAGG	6	+	Solanum tuberosum	part of a light responsive element
PmMDS	GATA-motif	AAGGATAAGG	1050	-	Solanum tuberosum	part of a light responsive element
PmMDS	Unnamed__1	CGTGG	1312	-	Zea mays
PmMDS	ARE	AAACCA	78	-	Zea mays	cis-acting regulatory element essential for the anaerobic induction
PmMDS	ARE	AAACCA	1381	+	Zea mays	cis-acting regulatory element essential for the anaerobic induction
PmMDS	WUN-motif	TTATTACAT	534	-	Nicotiana glutinosa
PmMDS	WUN-motif	AAATTACT	1007	+	Nicotiana glutinosa
PmMDS	MYC	CATTTG	416	-	Arabidopsis thaliana
PmMDS	MYC	CATGTG	1197	+	Arabidopsis thaliana
PmMDS	GCN4_motif	TGAGTCA	420	-	Oryza sativa	cis-regulatory element involved in endosperm expression
PmMDS	AC-I	(T/C)C(T/C)(C/T)ACC(T/C)ACC	15	-	Phaseolus vulgaris
PmMDS	W box	TTGACC	479	-	Arabidopsis thaliana
PmMDS	AT~TATA-box	TATATA	616	+	Arabidopsis thaliana
PmMDS	AT~TATA-box	TATATA	618	+	Arabidopsis thaliana
PmMDS	AT~TATA-box	TATATA	620	+	Arabidopsis thaliana
PmMDS	AT~TATA-box	TATATA	743	-	Arabidopsis thaliana
PmMDS	AT~TATA-box	TATATA	788	-	Arabidopsis thaliana
PmMDS	AT~TATA-box	TATATA	790	-	Arabidopsis thaliana
PmMDS	AT~TATA-box	TATATA	792	-	Arabidopsis thaliana
PmMDS	AT~TATA-box	TATATA	800	-	Arabidopsis thaliana
PmMDS	AT~TATA-box	TATATA	802	-	Arabidopsis thaliana
PmMDS	ATCT-motif	AATCTAATCC	138	-	Pisum sativum	part of a conserved DNA module involved in light responsiveness
PmMDS	ATCT-motif	AATCTAATCC	1206	+	Pisum sativum	part of a conserved DNA module involved in light responsiveness
PmMDS	Myc	TCTCTTA	971	+	Arabidopsis thaliana
PmMDS		motif_sequence	230	+	organism	short_function
PmMDS		motif_sequence	275	-	organism	short_function
PmMDS		motif_sequence	282	-	organism	short_function
PmMDS		motif_sequence	399	-	organism	short_function
PmMDS		motif_sequence	411	+	organism	short_function
PmMDS		motif_sequence	449	+	organism	short_function
PmMDS		motif_sequence	654	+	organism	short_function
PmMDS		motif_sequence	864	-	organism	short_function
PmMDS		motif_sequence	1072	+	organism	short_function
PmMDS		motif_sequence	1137	-	organism	short_function
PmMDS		motif_sequence	1330	-	organism	short_function
PmMDS		motif_sequence	1335	-	organism	short_function

## Sheet: Table S7
Table S7. The analysis of ten promoters using PLACE
ID	Factor or Site Name	Position	Strand	sequence	PLACE number
PmMDS	DOFCOREZM	5	(+)	AAAG	S000265
PmMDS	GT1CONSENSUS	8	(+)	GRWAAW	S000198
PmMDS	PYRIMIDINEBOXOSRAMY1A	10	(-)	CCTTTT	S000259
PmMDS	DOFCOREZM	11	(+)	AAAG	S000265
PmMDS	PALBOXLPC	15	(-)	YCYYACCWACC	S000138
PmMDS	MYBPZM	15	(-)	CCWACC	S000179
PmMDS	BOXLCOREDCPAL	15	(-)	ACCWWCC	S000492
PmMDS	MYBPZM	19	(-)	CCWACC	S000179
PmMDS	GT1CONSENSUS	24	(+)	GRWAAW	S000198
PmMDS	REALPHALGLHCB21	39	(-)	AACCAA	S000362
PmMDS	INRNTPSADB	43	(+)	YTCANTYY	S000395
PmMDS	ANAERO1CONSENSUS	48	(-)	AAACAAA	S000477
PmMDS	GTGANTG10	55	(+)	GTGA	S000378
PmMDS	ARR1AT	56	(+)	NGATT	S000454
PmMDS	SEF4MOTIFGM7S	58	(+)	RTTTTTR	S000103
PmMDS	POLASIG1	61	(-)	AATAAA	S000080
PmMDS	CAATBOX1	64	(-)	CAAT	S000028
PmMDS	CCAATBOX1	64	(-)	CCAAT	S000030
PmMDS	MYB1AT	78	(-)	WAACCA	S000408
PmMDS	GTGANTG10	84	(-)	GTGA	S000378
PmMDS	DOFCOREZM	91	(-)	AAAG	S000265
PmMDS	CACTFTPPCA1	102	(-)	YACT	S000449
PmMDS	CAATBOX1	107	(-)	CAAT	S000028
PmMDS	CAATBOX1	112	(-)	CAAT	S000028
PmMDS	SEF4MOTIFGM7S	127	(-)	RTTTTTR	S000103
PmMDS	SREATMSD	138	(-)	TTATCC	S000470
PmMDS	MYBST1	138	(+)	GGATA	S000180
PmMDS	CIACADIANLELHC	139	(-)	CAANNNNATC	S000252
PmMDS	GATABOX	139	(+)	GATA	S000039
PmMDS	IBOX	139	(+)	GATAAG	S000124
PmMDS	IBOXCORE	139	(+)	GATAA	S000199
PmMDS	IBOXCORENT	139	(+)	GATAAGR	S000424
PmMDS	ARR1AT	143	(+)	NGATT	S000454
PmMDS	CAATBOX1	145	(-)	CAAT	S000028
PmMDS	CCAATBOX1	145	(-)	CCAAT	S000030
PmMDS	REALPHALGLHCB21	146	(-)	AACCAA	S000362
PmMDS	MYB1AT	147	(-)	WAACCA	S000408
PmMDS	CACTFTPPCA1	151	(+)	YACT	S000449
PmMDS	NTBBF1ARROLB	152	(+)	ACTTTA	S000273
PmMDS	DOFCOREZM	153	(-)	AAAG	S000265
PmMDS	TAAAGSTKST1	153	(-)	TAAAG	S000387
PmMDS	POLASIG1	154	(-)	AATAAA	S000080
PmMDS	-10PEHVPSBD	156	(+)	TATTCT	S000392
PmMDS	NODCON2GM	160	(+)	CTCTT	S000462
PmMDS	OSE2ROOTNODULE	160	(+)	CTCTT	S000468
PmMDS	ARR1AT	168	(+)	NGATT	S000454
PmMDS	CACTFTPPCA1	172	(+)	YACT	S000449
PmMDS	ARR1AT	183	(+)	NGATT	S000454
PmMDS	CAATBOX1	185	(-)	CAAT	S000028
PmMDS	CCAATBOX1	185	(-)	CCAAT	S000030
PmMDS	SORLIP1AT	195	(+)	GCCAC	S000482
PmMDS	CACTFTPPCA1	197	(+)	YACT	S000449
PmMDS	EBOXBNNAPA	214	(-)	CANNTG	S000144
PmMDS	CATATGGMSAUR	214	(-)	CATATG	S000370
PmMDS	MYCCONSENSUSAT	214	(-)	CANNTG	S000407
PmMDS	EBOXBNNAPA	214	(+)	CANNTG	S000144
PmMDS	CATATGGMSAUR	214	(+)	CATATG	S000370
PmMDS	MYCCONSENSUSAT	214	(+)	CANNTG	S000407
PmMDS	GT1CONSENSUS	219	(+)	GRWAAW	S000198
PmMDS	GT1CONSENSUS	220	(+)	GRWAAW	S000198
PmMDS	GT1GMSCAM4	220	(+)	GAAAAA	S000453
PmMDS	CPBCSPOR	250	(-)	TATTAG	S000491
PmMDS	ROOTMOTIFTAPOX1	252	(-)	ATATT	S000098
PmMDS	DOFCOREZM	262	(+)	AAAG	S000265
PmMDS	SURECOREATSULTR11	266	(+)	GAGAC	S000499
PmMDS	CAATBOX1	272	(-)	CAAT	S000028
PmMDS	GT1CONSENSUS	290	(+)	GRWAAW	S000198
PmMDS	CAATBOX1	294	(-)	CAAT	S000028
PmMDS	ARR1AT	296	(+)	NGATT	S000454
PmMDS	GT1CONSENSUS	298	(-)	GRWAAW	S000198
PmMDS	ARR1AT	313	(+)	NGATT	S000454
PmMDS	DOFCOREZM	324	(-)	AAAG	S000265
PmMDS	CURECORECR	329	(-)	GTAC	S000493
PmMDS	CURECORECR	329	(+)	GTAC	S000493
PmMDS	DOFCOREZM	341	(+)	AAAG	S000265
PmMDS	NODCON2GM	342	(-)	CTCTT	S000462
PmMDS	OSE2ROOTNODULE	342	(-)	CTCTT	S000468
PmMDS	CAATBOX1	351	(+)	CAAT	S000028
PmMDS	NODCON2GM	356	(+)	CTCTT	S000462
PmMDS	OSE2ROOTNODULE	356	(+)	CTCTT	S000468
PmMDS	DOFCOREZM	358	(-)	AAAG	S000265
PmMDS	DOFCOREZM	365	(-)	AAAG	S000265
PmMDS	TAAAGSTKST1	365	(-)	TAAAG	S000387
PmMDS	CAATBOX1	376	(+)	CAAT	S000028
PmMDS	RAV1AAT	383	(-)	CAACA	S000314
PmMDS	ARR1AT	393	(+)	NGATT	S000454
PmMDS	ROOTMOTIFTAPOX1	403	(+)	ATATT	S000098
PmMDS	POLLEN1LELAT52	406	(-)	AGAAA	S000245
PmMDS	BOXIINTPATPB	407	(-)	ATAGAA	S000296
PmMDS	GATABOX	410	(-)	GATA	S000039
PmMDS	EBOXBNNAPA	416	(-)	CANNTG	S000144
PmMDS	MYCCONSENSUSAT	416	(-)	CANNTG	S000407
PmMDS	EBOXBNNAPA	416	(+)	CANNTG	S000144
PmMDS	MYCCONSENSUSAT	416	(+)	CANNTG	S000407
PmMDS	GCN4OSGLUB1	420	(-)	TGAGTCA	S000277
PmMDS	WBOXHVISO1	420	(+)	TGACT	S000442
PmMDS	WRKY71OS	420	(+)	TGAC	S000447
PmMDS	WBOXNTERF3	420	(+)	TGACY	S000457
PmMDS	CAATBOX1	425	(+)	CAAT	S000028
PmMDS	SORLIP1AT	430	(-)	GCCAC	S000482
PmMDS	CACTFTPPCA1	447	(+)	YACT	S000449
PmMDS	NODCON2GM	449	(+)	CTCTT	S000462
PmMDS	OSE2ROOTNODULE	449	(+)	CTCTT	S000468
PmMDS	CACTFTPPCA1	457	(-)	YACT	S000449
PmMDS	POLASIG3	460	(+)	AATAAT	S000088
PmMDS	GATABOX	470	(+)	GATA	S000039
PmMDS	GT1CONSENSUS	470	(+)	GRWAAW	S000198
PmMDS	IBOXCORE	470	(+)	GATAA	S000199
PmMDS	QELEMENTZMZM13	478	(+)	AGGTCA	S000254
PmMDS	ELRECOREPCRP1	479	(-)	TTGACC	S000142
PmMDS	WBOXNTERF3	479	(-)	TGACY	S000457
PmMDS	WBOXATNPR1	480	(-)	TTGAC	S000390
PmMDS	WRKY71OS	480	(-)	TGAC	S000447
PmMDS	ANAERO1CONSENSUS	487	(-)	AAACAAA	S000477
PmMDS	POLASIG2	491	(-)	AATTAAA	S000081
PmMDS	CACTFTPPCA1	502	(-)	YACT	S000449
PmMDS	AMYBOX2	523	(-)	TATCCAT	S000021
PmMDS	TATCCAYMOTIFOSRAMY3D	523	(-)	TATCCAY	S000256
PmMDS	TATCCAOSAMY	524	(-)	TATCCA	S000403
PmMDS	P1BS	525	(-)	GNATATNC	S000459
PmMDS	MYBST1	525	(+)	GGATA	S000180
PmMDS	P1BS	525	(+)	GNATATNC	S000459
PmMDS	GATABOX	526	(+)	GATA	S000039
PmMDS	CAATBOX1	532	(+)	CAAT	S000028
PmMDS	WBOXHVISO1	542	(-)	TGACT	S000442
PmMDS	WBOXNTERF3	542	(-)	TGACY	S000457
PmMDS	WRKY71OS	543	(-)	TGAC	S000447
PmMDS	RYREPEATBNNAPA	555	(-)	CATGCA	S000264
PmMDS	ARR1AT	564	(+)	NGATT	S000454
PmMDS	POLLEN1LELAT52	581	(+)	AGAAA	S000245
PmMDS	MYBCOREATCYCB1	585	(+)	AACGG	S000502
PmMDS	MYBPLANT	589	(-)	MACCWAMC	S000167
PmMDS	REALPHALGLHCB21	591	(-)	AACCAA	S000362
PmMDS	ARR1AT	597	(+)	NGATT	S000454
PmMDS	CACTFTPPCA1	613	(+)	YACT	S000449
PmMDS	SORLREP3AT	619	(-)	TGTATATAT	S000488
PmMDS	DPBFCOREDCDC3	637	(+)	ACACNNG	S000292
PmMDS	ARR1AT	649	(+)	NGATT	S000454
PmMDS	GT1CONSENSUS	651	(-)	GRWAAW	S000198
PmMDS	IBOXCORE	652	(-)	GATAA	S000199
PmMDS	GATABOX	653	(-)	GATA	S000039
PmMDS	CAATBOX1	659	(+)	CAAT	S000028
PmMDS	ROOTMOTIFTAPOX1	660	(-)	ATATT	S000098
PmMDS	GT1CONSENSUS	671	(-)	GRWAAW	S000198
PmMDS	NODCON2GM	676	(+)	CTCTT	S000462
PmMDS	OSE2ROOTNODULE	676	(+)	CTCTT	S000468
PmMDS	DOFCOREZM	678	(-)	AAAG	S000265
PmMDS	GATABOX	696	(+)	GATA	S000039
PmMDS	IBOXCORE	696	(+)	GATAA	S000199
PmMDS	MYB1AT	698	(+)	WAACCA	S000408
PmMDS	MYBPLANT	699	(+)	MACCWAMC	S000167
PmMDS	REALPHALGLHCB21	699	(+)	AACCAA	S000362
PmMDS	ANAERO1CONSENSUS	703	(+)	AAACAAA	S000477
PmMDS	S2FSORPL21	709	(-)	CCATACATT	S000166
PmMDS	CPBCSPOR	720	(-)	TATTAG	S000491
PmMDS	MARTBOX	722	(-)	TTWTWTTWTT	S000067
PmMDS	POLASIG1	722	(+)	AATAAA	S000080
PmMDS	GTGANTG10	734	(-)	GTGA	S000378
PmMDS	EBOXBNNAPA	737	(-)	CANNTG	S000144
PmMDS	CATATGGMSAUR	737	(-)	CATATG	S000370
PmMDS	MYCCONSENSUSAT	737	(-)	CANNTG	S000407
PmMDS	EBOXBNNAPA	737	(+)	CANNTG	S000144
PmMDS	CATATGGMSAUR	737	(+)	CATATG	S000370
PmMDS	MYCCONSENSUSAT	737	(+)	CANNTG	S000407
PmMDS	P1BS	742	(-)	GNATATNC	S000459
PmMDS	P1BS	742	(+)	GNATATNC	S000459
PmMDS	POLASIG3	753	(-)	AATAAT	S000088
PmMDS	-10PEHVPSBD	755	(+)	TATTCT	S000392
PmMDS	TATABOX5	760	(+)	TTATTT	S000203
PmMDS	POLASIG1	766	(-)	AATAAA	S000080
PmMDS	TATABOX5	767	(+)	TTATTT	S000203
PmMDS	ARR1AT	772	(+)	NGATT	S000454
PmMDS	CAATBOX1	774	(-)	CAAT	S000028
PmMDS	GATABOX	783	(+)	GATA	S000039
PmMDS	CACTFTPPCA1	785	(+)	YACT	S000449
PmMDS	CARGCW8GAT	799	(-)	CWWWWWWWWG	S000431
PmMDS	CARGCW8GAT	799	(+)	CWWWWWWWWG	S000431
PmMDS	EVENINGAT	807	(-)	AAAATATCT	S000385
PmMDS	GATABOX	808	(+)	GATA	S000039
PmMDS	ROOTMOTIFTAPOX1	809	(+)	ATATT	S000098
PmMDS	SEF4MOTIFGM7S	811	(+)	RTTTTTR	S000103
PmMDS	GT1CONSENSUS	821	(+)	GRWAAW	S000198
PmMDS	TATABOX5	823	(-)	TTATTT	S000203
PmMDS	POLASIG1	824	(+)	AATAAA	S000080
PmMDS	CAATBOX1	829	(-)	CAAT	S000028
PmMDS	GT1CORE	852	(+)	GGTTAA	S000125
PmMDS	NTBBF1ARROLB	855	(-)	ACTTTA	S000273
PmMDS	TAAAGSTKST1	855	(+)	TAAAG	S000387
PmMDS	DOFCOREZM	856	(+)	AAAG	S000265
PmMDS	CACTFTPPCA1	858	(-)	YACT	S000449
PmMDS	GTGANTG10	859	(+)	GTGA	S000378
PmMDS	GATABOX	867	(+)	GATA	S000039
PmMDS	CACTFTPPCA1	870	(-)	YACT	S000449
PmMDS	CURECORECR	871	(-)	GTAC	S000493
PmMDS	CURECORECR	871	(+)	GTAC	S000493
PmMDS	CACTFTPPCA1	872	(+)	YACT	S000449
PmMDS	GTGANTG10	881	(+)	GTGA	S000378
PmMDS	WBOXHVISO1	882	(+)	TGACT	S000442
PmMDS	WRKY71OS	882	(+)	TGAC	S000447
PmMDS	WBOXNTERF3	882	(+)	TGACY	S000457
PmMDS	POLASIG2	893	(-)	AATTAAA	S000081
PmMDS	CAATBOX1	897	(-)	CAAT	S000028
PmMDS	POLASIG1	909	(-)	AATAAA	S000080
PmMDS	CACTFTPPCA1	916	(-)	YACT	S000449
PmMDS	INRNTPSADB	926	(+)	YTCANTYY	S000395
PmMDS	-300ELEMENT	929	(-)	TGHAAARK	S000122
PmMDS	CAREOSREP1	935	(+)	CAACTC	S000421
PmMDS	CAATBOX1	940	(+)	CAAT	S000028
PmMDS	GTGANTG10	944	(+)	GTGA	S000378
PmMDS	SEF1MOTIF	955	(-)	ATATTTAWW	S000006
PmMDS	TATABOX2	955	(+)	TATAAAT	S000109
PmMDS	ROOTMOTIFTAPOX1	959	(-)	ATATT	S000098
PmMDS	SEBFCONSSTPR10A	966	(+)	YTGTCWC	S000391
PmMDS	ARFAT	967	(+)	TGTCTC	S000270
PmMDS	SURECOREATSULTR11	968	(-)	GAGAC	S000499
PmMDS	NODCON2GM	972	(+)	CTCTT	S000462
PmMDS	OSE2ROOTNODULE	972	(+)	CTCTT	S000468
PmMDS	TATABOX5	978	(-)	TTATTT	S000203
PmMDS	POLASIG1	979	(+)	AATAAA	S000080
PmMDS	SEF4MOTIFGM7S	981	(-)	RTTTTTR	S000103
PmMDS	MARTBOX	982	(-)	TTWTWTTWTT	S000067
PmMDS	TATABOX5	984	(-)	TTATTT	S000203
PmMDS	MARTBOX	985	(-)	TTWTWTTWTT	S000067
PmMDS	POLASIG1	985	(+)	AATAAA	S000080
PmMDS	TATABOX5	989	(-)	TTATTT	S000203
PmMDS	POLASIG1	990	(+)	AATAAA	S000080
PmMDS	SORLIP1AT	999	(+)	GCCAC	S000482
PmMDS	SEF4MOTIFGM7S	1004	(-)	RTTTTTR	S000103
PmMDS	CACTFTPPCA1	1011	(+)	YACT	S000449
PmMDS	TATABOX5	1017	(-)	TTATTT	S000203
PmMDS	POLASIG3	1018	(+)	AATAAT	S000088
PmMDS	ROOTMOTIFTAPOX1	1021	(-)	ATATT	S000098
PmMDS	ROOTMOTIFTAPOX1	1022	(+)	ATATT	S000098
PmMDS	POLASIG3	1024	(-)	AATAAT	S000088
PmMDS	CAATBOX1	1027	(-)	CAAT	S000028
PmMDS	CCAATBOX1	1027	(-)	CCAAT	S000030
PmMDS	GT1CONSENSUS	1036	(-)	GRWAAW	S000198
PmMDS	GATABOX	1043	(-)	GATA	S000039
PmMDS	MYBST1	1043	(-)	GGATA	S000180
PmMDS	PYRIMIDINEBOXOSRAMY1A	1050	(+)	CCTTTT	S000259
PmMDS	DOFCOREZM	1051	(-)	AAAG	S000265
PmMDS	GT1CONSENSUS	1052	(-)	GRWAAW	S000198
PmMDS	POLASIG3	1078	(-)	AATAAT	S000088
PmMDS	CAREOSREP1	1085	(+)	CAACTC	S000421
PmMDS	TATABOX5	1092	(-)	TTATTT	S000203
PmMDS	POLASIG3	1093	(+)	AATAAT	S000088
PmMDS	ROOTMOTIFTAPOX1	1096	(-)	ATATT	S000098
PmMDS	ROOTMOTIFTAPOX1	1097	(+)	ATATT	S000098
PmMDS	POLASIG3	1099	(-)	AATAAT	S000088
PmMDS	CAATBOX1	1102	(-)	CAAT	S000028
PmMDS	BIHD1OS	1104	(+)	TGTCA	S000498
PmMDS	WRKY71OS	1105	(-)	TGAC	S000447
PmMDS	POLASIG2	1113	(-)	AATTAAA	S000081
PmMDS	ROOTMOTIFTAPOX1	1127	(-)	ATATT	S000098
PmMDS	ROOTMOTIFTAPOX1	1128	(+)	ATATT	S000098
PmMDS	SEF4MOTIFGM7S	1146	(+)	RTTTTTR	S000103
PmMDS	ANAERO1CONSENSUS	1149	(-)	AAACAAA	S000477
PmMDS	POLASIG1	1156	(-)	AATAAA	S000080
PmMDS	CAATBOX1	1159	(-)	CAAT	S000028
PmMDS	GATABOX	1164	(+)	GATA	S000039
PmMDS	GATABOX	1166	(-)	GATA	S000039
PmMDS	REALPHALGLHCB21	1176	(-)	AACCAA	S000362
PmMDS	WBOXATNPR1	1180	(+)	TTGAC	S000390
PmMDS	BIHD1OS	1181	(-)	TGTCA	S000498
PmMDS	WRKY71OS	1181	(+)	TGAC	S000447
PmMDS	GT1CONSENSUS	1189	(-)	GRWAAW	S000198
PmMDS	EBOXBNNAPA	1197	(-)	CANNTG	S000144
PmMDS	MYCATRD22	1197	(-)	CACATG	S000174
PmMDS	MYCCONSENSUSAT	1197	(-)	CANNTG	S000407
PmMDS	EBOXBNNAPA	1197	(+)	CANNTG	S000144
PmMDS	MYCCONSENSUSAT	1197	(+)	CANNTG	S000407
PmMDS	MYCATERD1	1197	(+)	CATGTG	S000413
PmMDS	GTGANTG10	1200	(+)	GTGA	S000378
PmMDS	CCA1ATLHCB1	1203	(+)	AAMAATCT	S000149
PmMDS	CAATBOX1	1205	(+)	CAAT	S000028
PmMDS	ARR1AT	1206	(-)	NGATT	S000454
PmMDS	ERELEE4	1211	(+)	AWTTCAAA	S000037
PmMDS	TBOXATGAPB	1215	(-)	ACTTTG	S000383
PmMDS	DOFCOREZM	1216	(+)	AAAG	S000265
PmMDS	CAATBOX1	1222	(+)	CAAT	S000028
PmMDS	POLASIG1	1223	(+)	AATAAA	S000080
PmMDS	ROOTMOTIFTAPOX1	1231	(-)	ATATT	S000098
PmMDS	GATABOX	1233	(-)	GATA	S000039
PmMDS	NODCON1GM	1234	(-)	AAAGAT	S000461
PmMDS	OSE1ROOTNODULE	1234	(-)	AAAGAT	S000467
PmMDS	DOFCOREZM	1236	(-)	AAAG	S000265
PmMDS	POLLEN1LELAT52	1237	(-)	AGAAA	S000245
PmMDS	CACTFTPPCA1	1241	(+)	YACT	S000449
PmMDS	LTRE1HVBLT49	1245	(+)	CCGAAA	S000250
PmMDS	INRNTPSADB	1268	(+)	YTCANTYY	S000395
PmMDS	CAATBOX1	1270	(+)	CAAT	S000028
PmMDS	CARGCW8GAT	1279	(-)	CWWWWWWWWG	S000431
PmMDS	CARGCW8GAT	1279	(+)	CWWWWWWWWG	S000431
PmMDS	POLASIG2	1289	(+)	AATTAAA	S000081
PmMDS	POLASIG2	1297	(+)	AATTAAA	S000081
PmMDS	GATABOX	1307	(+)	GATA	S000039
PmMDS	IBOXCORE	1307	(+)	GATAA	S000199
PmMDS	MYB1AT	1309	(+)	WAACCA	S000408
PmMDS	CAATBOX1	1319	(+)	CAAT	S000028
PmMDS	XYLAT	1325	(+)	ACAAAGAA	S000510
PmMDS	DOFCOREZM	1327	(+)	AAAG	S000265
PmMDS	CACTFTPPCA1	1334	(-)	YACT	S000449
PmMDS	ARR1AT	1337	(+)	NGATT	S000454
PmMDS	CIACADIANLELHC	1338	(-)	CAANNNNATC	S000252
PmMDS	CAATBOX1	1344	(-)	CAAT	S000028
PmMDS	RAV1AAT	1346	(-)	CAACA	S000314
PmMDS	WBOXNTERF3	1364	(-)	TGACY	S000457
PmMDS	WRKY71OS	1365	(-)	TGAC	S000447
PmMDS	GTGANTG10	1366	(-)	GTGA	S000378
PmMDS	CACTFTPPCA1	1367	(+)	YACT	S000449
PmMDS	TBOXATGAPB	1368	(+)	ACTTTG	S000383
PmMDS	DOFCOREZM	1369	(-)	AAAG	S000265
PmMDS	MYB1AT	1381	(+)	WAACCA	S000408
PmMDS	CBFHV	1391	(+)	RYCGAC	S000497
PmMDS	POLLEN1LELAT52	1402	(+)	AGAAA	S000245
PmMDS	INTRONLOWER	1407	(+)	TGCAGG	S000086
PmMDS	CAATBOX1	1414	(-)	CAAT	S000028
PmMDS	POLASIG1	1418	(+)	AATAAA	S000080
PmMDS	TATABOX5	1426	(-)	TTATTT	S000203
PmMDS	POLASIG3	1427	(+)	AATAAT	S000088
PmMDS	GCCCORE	1433	(-)	GCCGCC	S000430
PmMDS	GTGANTG10	1441	(-)	GTGA	S000378
PmMDS	RAV1AAT	1444	(+)	CAACA	S000314
PmMDS	GTGANTG10	1450	(-)	GTGA	S000378
PmDXS1	ZDNAFORMINGATCAB1	10	(+)	ATACGTGT	S000321
PmDXS1	ACGTABREMOTIFAOSOSEM	11	(+)	TACGTGTC	S000281
PmDXS1	ABREMOTIFAOSOSEM	11	(+)	TACGTGTC	S000299
PmDXS1	ACGTATERD1	12	(-)	ACGT	S000415
PmDXS1	ACGTABREMOTIFA2OSEM	12	(+)	ACGTGKC	S000394
PmDXS1	ABRELATERD1	12	(+)	ACGTG	S000414
PmDXS1	ACGTATERD1	12	(+)	ACGT	S000415
PmDXS1	GADOWNAT	12	(+)	ACGTGTC	S000438
PmDXS1	AUXREPSIAA4	15	(+)	KGTCCCAT	S000026
PmDXS1	QELEMENTZMZM13	22	(-)	AGGTCA	S000254
PmDXS1	WRKY71OS	22	(+)	TGAC	S000447
PmDXS1	WBOXNTERF3	22	(+)	TGACY	S000457
PmDXS1	MARTBOX	33	(+)	TTWTWTTWTT	S000067
PmDXS1	TATABOX5	33	(+)	TTATTT	S000203
PmDXS1	POLASIG1	37	(-)	AATAAA	S000080
PmDXS1	TATABOX5	38	(+)	TTATTT	S000203
PmDXS1	GT1CONSENSUS	48	(+)	GRWAAW	S000198
PmDXS1	GT1CONSENSUS	49	(+)	GRWAAW	S000198
PmDXS1	GT1CORE	54	(-)	GGTTAA	S000125
PmDXS1	MYB1AT	55	(+)	WAACCA	S000408
PmDXS1	CCA1ATLHCB1	62	(-)	AAMAATCT	S000149
PmDXS1	ARR1AT	62	(+)	NGATT	S000454
PmDXS1	CAATBOX1	64	(-)	CAAT	S000028
PmDXS1	GATABOX	80	(-)	GATA	S000039
PmDXS1	PREATPRODH	91	(+)	ACTCAT	S000450
PmDXS1	ARR1AT	102	(+)	NGATT	S000454
PmDXS1	BIHD1OS	110	(+)	TGTCA	S000498
PmDXS1	WBOXATNPR1	111	(-)	TTGAC	S000390
PmDXS1	WRKY71OS	111	(-)	TGAC	S000447
PmDXS1	TBOXATGAPB	113	(-)	ACTTTG	S000383
PmDXS1	DOFCOREZM	114	(+)	AAAG	S000265
PmDXS1	CACTFTPPCA1	116	(-)	YACT	S000449
PmDXS1	REALPHALGLHCB21	121	(-)	AACCAA	S000362
PmDXS1	MYB1AT	122	(-)	WAACCA	S000408
PmDXS1	GT1CORE	123	(+)	GGTTAA	S000125
PmDXS1	WBOXHVISO1	128	(-)	TGACT	S000442
PmDXS1	WBOXNTERF3	128	(-)	TGACY	S000457
PmDXS1	WRKY71OS	129	(-)	TGAC	S000447
PmDXS1	-300CORE	146	(+)	TGTAAAG	S000001
PmDXS1	-300ELEMENT	146	(+)	TGHAAARK	S000122
PmDXS1	TAAAGSTKST1	148	(+)	TAAAG	S000387
PmDXS1	DOFCOREZM	149	(+)	AAAG	S000265
PmDXS1	CURECORECR	177	(-)	GTAC	S000493
PmDXS1	CURECORECR	177	(+)	GTAC	S000493
PmDXS1	ROOTMOTIFTAPOX1	187	(-)	ATATT	S000098
PmDXS1	GATABOX	189	(-)	GATA	S000039
PmDXS1	EBOXBNNAPA	198	(-)	CANNTG	S000144
PmDXS1	MYCCONSENSUSAT	198	(-)	CANNTG	S000407
PmDXS1	CAATBOX1	198	(+)	CAAT	S000028
PmDXS1	EBOXBNNAPA	198	(+)	CANNTG	S000144
PmDXS1	MYCCONSENSUSAT	198	(+)	CANNTG	S000407
PmDXS1	CAATBOX1	200	(-)	CAAT	S000028
PmDXS1	ERELEE4	222	(+)	AWTTCAAA	S000037
PmDXS1	CARGCW8GAT	226	(-)	CWWWWWWWWG	S000431
PmDXS1	CARGCW8GAT	226	(+)	CWWWWWWWWG	S000431
PmDXS1	ROOTMOTIFTAPOX1	228	(-)	ATATT	S000098
PmDXS1	DOFCOREZM	261	(-)	AAAG	S000265
PmDXS1	POLLEN1LELAT52	263	(-)	AGAAA	S000245
PmDXS1	BOXIINTPATPB	264	(-)	ATAGAA	S000296
PmDXS1	GT1CONSENSUS	277	(-)	GRWAAW	S000198
PmDXS1	IBOXCORE	278	(-)	GATAA	S000199
PmDXS1	SREATMSD	278	(+)	TTATCC	S000470
PmDXS1	GATABOX	279	(-)	GATA	S000039
PmDXS1	MYBST1	279	(-)	GGATA	S000180
PmDXS1	GTGANTG10	284	(-)	GTGA	S000378
PmDXS1	RHERPATEXPA7	284	(+)	KCACGW	S000512
PmDXS1	ARR1AT	298	(+)	NGATT	S000454
PmDXS1	WBOXATNPR1	311	(+)	TTGAC	S000390
PmDXS1	BIHD1OS	312	(-)	TGTCA	S000498
PmDXS1	WRKY71OS	312	(+)	TGAC	S000447
PmDXS1	ARR1AT	318	(-)	NGATT	S000454
PmDXS1	EBOXBNNAPA	326	(-)	CANNTG	S000144
PmDXS1	MYCCONSENSUSAT	326	(-)	CANNTG	S000407
PmDXS1	EBOXBNNAPA	326	(+)	CANNTG	S000144
PmDXS1	MYCCONSENSUSAT	326	(+)	CANNTG	S000407
PmDXS1	CACTFTPPCA1	348	(+)	YACT	S000449
PmDXS1	DOFCOREZM	355	(-)	AAAG	S000265
PmDXS1	ANAERO1CONSENSUS	356	(-)	AAACAAA	S000477
PmDXS1	CAATBOX1	374	(-)	CAAT	S000028
PmDXS1	ARR1AT	376	(+)	NGATT	S000454
PmDXS1	GTGANTG10	382	(+)	GTGA	S000378
PmDXS1	ARR1AT	386	(-)	NGATT	S000454
PmDXS1	GT1CONSENSUS	390	(+)	GRWAAW	S000198
PmDXS1	GT1GMSCAM4	390	(+)	GAAAAA	S000453
PmDXS1	TATABOX5	393	(-)	TTATTT	S000203
PmDXS1	CACTFTPPCA1	398	(-)	YACT	S000449
PmDXS1	SEBFCONSSTPR10A	399	(-)	YTGTCWC	S000391
PmDXS1	GTGANTG10	399	(+)	GTGA	S000378
PmDXS1	BIHD1OS	400	(-)	TGTCA	S000498
PmDXS1	WRKY71OS	400	(+)	TGAC	S000447
PmDXS1	CAATBOX1	406	(-)	CAAT	S000028
PmDXS1	ARR1AT	408	(+)	NGATT	S000454
PmDXS1	NTBBF1ARROLB	412	(-)	ACTTTA	S000273
PmDXS1	TAAAGSTKST1	412	(+)	TAAAG	S000387
PmDXS1	DOFCOREZM	413	(+)	AAAG	S000265
PmDXS1	WBOXATNPR1	417	(+)	TTGAC	S000390
PmDXS1	WBOXHVISO1	418	(+)	TGACT	S000442
PmDXS1	WRKY71OS	418	(+)	TGAC	S000447
PmDXS1	WBOXNTERF3	418	(+)	TGACY	S000457
PmDXS1	REALPHALGLHCB21	425	(+)	AACCAA	S000362
PmDXS1	TBOXATGAPB	428	(-)	ACTTTG	S000383
PmDXS1	DOFCOREZM	429	(+)	AAAG	S000265
PmDXS1	SITEIIATCYTC	434	(+)	TGGGCY	S000474
PmDXS1	SORLIP2AT	435	(+)	GGGCC	S000483
PmDXS1	CACTFTPPCA1	458	(+)	YACT	S000449
PmDXS1	DOFCOREZM	460	(-)	AAAG	S000265
PmDXS1	TATABOX5	469	(-)	TTATTT	S000203
PmDXS1	POLASIG3	470	(+)	AATAAT	S000088
PmDXS1	PYRIMIDINEBOXOSRAMY1A	482	(+)	CCTTTT	S000259
PmDXS1	DOFCOREZM	483	(-)	AAAG	S000265
PmDXS1	ARR1AT	488	(-)	NGATT	S000454
PmDXS1	POLLEN1LELAT52	493	(+)	AGAAA	S000245
PmDXS1	CACTFTPPCA1	504	(-)	YACT	S000449
PmDXS1	DOFCOREZM	516	(+)	AAAG	S000265
PmDXS1	CACTFTPPCA1	518	(-)	YACT	S000449
PmDXS1	RAV1AAT	524	(-)	CAACA	S000314
PmDXS1	ROOTMOTIFTAPOX1	530	(-)	ATATT	S000098
PmDXS1	ROOTMOTIFTAPOX1	533	(+)	ATATT	S000098
PmDXS1	RAV1AAT	538	(-)	CAACA	S000314
PmDXS1	ELRECOREPCRP1	540	(+)	TTGACC	S000142
PmDXS1	WBOXATNPR1	540	(+)	TTGAC	S000390
PmDXS1	WRKY71OS	541	(+)	TGAC	S000447
PmDXS1	WBOXNTERF3	541	(+)	TGACY	S000457
PmDXS1	EBOXBNNAPA	545	(-)	CANNTG	S000144
PmDXS1	MYCCONSENSUSAT	545	(-)	CANNTG	S000407
PmDXS1	EBOXBNNAPA	545	(+)	CANNTG	S000144
PmDXS1	MYCCONSENSUSAT	545	(+)	CANNTG	S000407
PmDXS1	CACTFTPPCA1	545	(+)	YACT	S000449
PmDXS1	EBOXBNNAPA	551	(-)	CANNTG	S000144
PmDXS1	MYBCORE	551	(-)	CNGTTR	S000176
PmDXS1	MYCCONSENSUSAT	551	(-)	CANNTG	S000407
PmDXS1	EBOXBNNAPA	551	(+)	CANNTG	S000144
PmDXS1	MYCCONSENSUSAT	551	(+)	CANNTG	S000407
PmDXS1	MYB2CONSENSUSAT	551	(+)	YAACKG	S000409
PmDXS1	GCCCORE	556	(-)	GCCGCC	S000430
PmDXS1	GT1CONSENSUS	562	(+)	GRWAAW	S000198
PmDXS1	GT1CONSENSUS	576	(+)	GRWAAW	S000198
PmDXS1	EECCRCAH1	577	(-)	GANTTNC	S000494
PmDXS1	ABRERATCAL	584	(-)	MACGYGB	S000507
PmDXS1	RHERPATEXPA7	584	(+)	KCACGW	S000512
PmDXS1	CACGTGMOTIF	585	(-)	CACGTG	S000042
PmDXS1	EBOXBNNAPA	585	(-)	CANNTG	S000144
PmDXS1	MYCCONSENSUSAT	585	(-)	CANNTG	S000407
PmDXS1	ABRELATERD1	585	(-)	ACGTG	S000414
PmDXS1	CACGTGMOTIF	585	(+)	CACGTG	S000042
PmDXS1	EBOXBNNAPA	585	(+)	CANNTG	S000144
PmDXS1	MYCCONSENSUSAT	585	(+)	CANNTG	S000407
PmDXS1	ABRERATCAL	585	(+)	MACGYGB	S000507
PmDXS1	ACGTATERD1	586	(-)	ACGT	S000415
PmDXS1	RHERPATEXPA7	586	(-)	KCACGW	S000512
PmDXS1	ABRELATERD1	586	(+)	ACGTG	S000414
PmDXS1	ACGTATERD1	586	(+)	ACGT	S000415
PmDXS1	RYREPEATLEGUMINBOX	588	(-)	CATGCAY	S000100
PmDXS1	RYREPEATBNNAPA	589	(-)	CATGCA	S000264
PmDXS1	GTGANTG10	619	(-)	GTGA	S000378
PmDXS1	TATABOX5	624	(+)	TTATTT	S000203
PmDXS1	POLASIG1	627	(-)	AATAAA	S000080
PmDXS1	POLASIG3	630	(-)	AATAAT	S000088
PmDXS1	CACTFTPPCA1	657	(+)	YACT	S000449
PmDXS1	DOFCOREZM	659	(-)	AAAG	S000265
PmDXS1	POLASIG1	661	(-)	AATAAA	S000080
PmDXS1	TATABOX5	662	(+)	TTATTT	S000203
PmDXS1	GT1CONSENSUS	664	(-)	GRWAAW	S000198
PmDXS1	CAATBOX1	675	(-)	CAAT	S000028
PmDXS1	CCAATBOX1	675	(-)	CCAAT	S000030
PmDXS1	BIHD1OS	682	(+)	TGTCA	S000498
PmDXS1	WRKY71OS	683	(-)	TGAC	S000447
PmDXS1	TATABOX5	688	(-)	TTATTT	S000203
PmDXS1	CACTFTPPCA1	700	(-)	YACT	S000449
PmDXS1	DPBFCOREDCDC3	705	(+)	ACACNNG	S000292
PmDXS1	EBOXBNNAPA	706	(-)	CANNTG	S000144
PmDXS1	MYCCONSENSUSAT	706	(-)	CANNTG	S000407
PmDXS1	EBOXBNNAPA	706	(+)	CANNTG	S000144
PmDXS1	MYCCONSENSUSAT	706	(+)	CANNTG	S000407
PmDXS1	CACTFTPPCA1	706	(+)	YACT	S000449
PmDXS1	WBOXATNPR1	709	(+)	TTGAC	S000390
PmDXS1	WBOXHVISO1	710	(+)	TGACT	S000442
PmDXS1	WRKY71OS	710	(+)	TGAC	S000447
PmDXS1	WBOXNTERF3	710	(+)	TGACY	S000457
PmDXS1	BIHD1OS	715	(+)	TGTCA	S000498
PmDXS1	WRKY71OS	716	(-)	TGAC	S000447
PmDXS1	IBOX	722	(-)	GATAAG	S000124
PmDXS1	IBOXCORE	723	(-)	GATAA	S000199
PmDXS1	GATABOX	724	(-)	GATA	S000039
PmDXS1	GATABOX	746	(+)	GATA	S000039
PmDXS1	CACTFTPPCA1	748	(+)	YACT	S000449
PmDXS1	ARR1AT	752	(+)	NGATT	S000454
PmDXS1	BIHD1OS	757	(+)	TGTCA	S000498
PmDXS1	WRKY71OS	758	(-)	TGAC	S000447
PmDXS1	BIHD1OS	767	(+)	TGTCA	S000498
PmDXS1	WRKY71OS	768	(-)	TGAC	S000447
PmDXS1	TATABOX3	771	(-)	TATTAAT	S000110
PmDXS1	PREATPRODH	782	(-)	ACTCAT	S000450
PmDXS1	CACTFTPPCA1	785	(-)	YACT	S000449
PmDXS1	CACTFTPPCA1	791	(+)	YACT	S000449
PmDXS1	CACTFTPPCA1	800	(+)	YACT	S000449
PmDXS1	GATABOX	803	(-)	GATA	S000039
PmDXS1	EBOXBNNAPA	806	(-)	CANNTG	S000144
PmDXS1	MYCCONSENSUSAT	806	(-)	CANNTG	S000407
PmDXS1	EBOXBNNAPA	806	(+)	CANNTG	S000144
PmDXS1	MYCCONSENSUSAT	806	(+)	CANNTG	S000407
PmDXS1	AMYBOX1	808	(-)	TAACARA	S000020
PmDXS1	MYBGAHV	808	(-)	TAACAAA	S000181
PmDXS1	GAREAT	808	(-)	TAACAAR	S000439
PmDXS1	TATABOX2	813	(+)	TATAAAT	S000109
PmDXS1	TATABOX5	816	(-)	TTATTT	S000203
PmDXS1	CACTFTPPCA1	827	(-)	YACT	S000449
PmDXS1	GATABOX	847	(+)	GATA	S000039
PmDXS1	IBOXCORE	847	(+)	GATAA	S000199
PmDXS1	CARGCW8GAT	852	(-)	CWWWWWWWWG	S000431
PmDXS1	CARGCW8GAT	852	(+)	CWWWWWWWWG	S000431
PmDXS1	TATABOX2	853	(+)	TATAAAT	S000109
PmDXS1	INRNTPSADB	856	(-)	YTCANTYY	S000395
PmDXS1	CAATBOX1	858	(-)	CAAT	S000028
PmDXS1	ROOTMOTIFTAPOX1	862	(-)	ATATT	S000098
PmDXS1	TATABOX4	864	(+)	TATATAA	S000111
PmDXS1	PREATPRODH	870	(+)	ACTCAT	S000450
PmDXS1	POLASIG3	874	(-)	AATAAT	S000088
PmDXS1	CAATBOX1	891	(+)	CAAT	S000028
PmDXS1	RAV1AAT	910	(+)	CAACA	S000314
PmDXS1	CACTFTPPCA1	913	(+)	YACT	S000449
PmDXS1	WRKY71OS	926	(+)	TGAC	S000447
PmDXS1	WBOXNTERF3	926	(+)	TGACY	S000457
PmDXS1	ROOTMOTIFTAPOX1	934	(-)	ATATT	S000098
PmDXS1	ROOTMOTIFTAPOX1	935	(+)	ATATT	S000098
PmDXS1	CCAATBOX1	940	(+)	CCAAT	S000030
PmDXS1	CAATBOX1	941	(+)	CAAT	S000028
PmDXS1	CACTFTPPCA1	944	(+)	YACT	S000449
PmDXS1	BOXCPSAS1	946	(+)	CTCCCAC	S000226
PmDXS1	EBOXBNNAPA	952	(-)	CANNTG	S000144
PmDXS1	MYCCONSENSUSAT	952	(-)	CANNTG	S000407
PmDXS1	CAATBOX1	952	(+)	CAAT	S000028
PmDXS1	EBOXBNNAPA	952	(+)	CANNTG	S000144
PmDXS1	MYCCONSENSUSAT	952	(+)	CANNTG	S000407
PmDXS1	CAATBOX1	954	(-)	CAAT	S000028
PmDXS1	-300ELEMENT	956	(+)	TGHAAARK	S000122
PmDXS1	DOFCOREZM	960	(+)	AAAG	S000265
PmDXS1	DOFCOREZM	969	(+)	AAAG	S000265
PmDXS1	CPBCSPOR	981	(-)	TATTAG	S000491
PmDXS1	POLASIG1	983	(+)	AATAAA	S000080
PmDXS1	POLASIG2	987	(+)	AATTAAA	S000081
PmDXS1	BIHD1OS	994	(+)	TGTCA	S000498
PmDXS1	WBOXATNPR1	995	(-)	TTGAC	S000390
PmDXS1	WRKY71OS	995	(-)	TGAC	S000447
PmDXS1	CAATBOX1	997	(+)	CAAT	S000028
PmDXS1	CIACADIANLELHC	997	(+)	CAANNNNATC	S000252
PmDXS1	ROOTMOTIFTAPOX1	998	(-)	ATATT	S000098
PmDXS1	ARR1AT	1003	(-)	NGATT	S000454
PmDXS1	CAREOSREP1	1006	(+)	CAACTC	S000421
PmDXS1	PREATPRODH	1008	(+)	ACTCAT	S000450
PmDXS1	ARR1AT	1025	(+)	NGATT	S000454
PmDXS1	CURECORECR	1040	(-)	GTAC	S000493
PmDXS1	CURECORECR	1040	(+)	GTAC	S000493
PmDXS1	SEF1MOTIF	1044	(+)	ATATTTAWW	S000006
PmDXS1	ROOTMOTIFTAPOX1	1044	(+)	ATATT	S000098
PmDXS1	TATABOXOSPAL	1045	(+)	TATTTAA	S000400
PmDXS1	NRRBNEXTA	1052	(+)	TAGTGGAT	S000242
PmDXS1	CACTFTPPCA1	1053	(-)	YACT	S000449
PmDXS1	TATCCAYMOTIFOSRAMY3D	1054	(-)	TATCCAY	S000256
PmDXS1	TATCCACHVAL21	1054	(-)	TATCCAC	S000416
PmDXS1	TATCCAOSAMY	1055	(-)	TATCCA	S000403
PmDXS1	SREATMSD	1056	(-)	TTATCC	S000470
PmDXS1	MYBST1	1056	(+)	GGATA	S000180
PmDXS1	GATABOX	1057	(+)	GATA	S000039
PmDXS1	GT1CONSENSUS	1057	(+)	GRWAAW	S000198
PmDXS1	IBOXCORE	1057	(+)	GATAA	S000199
PmDXS1	ROOTMOTIFTAPOX1	1061	(-)	ATATT	S000098
PmDXS1	ROOTMOTIFTAPOX1	1062	(+)	ATATT	S000098
PmDXS1	WBOXNTERF3	1069	(-)	TGACY	S000457
PmDXS1	WRKY71OS	1070	(-)	TGAC	S000447
PmDXS1	RAV1AAT	1082	(+)	CAACA	S000314
PmDXS1	SEF4MOTIFGM7S	1086	(+)	RTTTTTR	S000103
PmDXS1	ARR1AT	1099	(+)	NGATT	S000454
PmDXS1	CACTFTPPCA1	1108	(-)	YACT	S000449
PmDXS1	RAV1AAT	1117	(-)	CAACA	S000314
PmDXS1	CANBNNAPA	1123	(-)	CNAACAC	S000148
PmDXS1	RAV1AAT	1138	(+)	CAACA	S000314
PmDXS1	EBOXBNNAPA	1141	(-)	CANNTG	S000144
PmDXS1	MYCCONSENSUSAT	1141	(-)	CANNTG	S000407
PmDXS1	EBOXBNNAPA	1141	(+)	CANNTG	S000144
PmDXS1	MYCCONSENSUSAT	1141	(+)	CANNTG	S000407
PmDXS1	ARR1AT	1150	(+)	NGATT	S000454
PmDXS1	ROOTMOTIFTAPOX1	1161	(+)	ATATT	S000098
PmDXS1	CAATBOX1	1163	(-)	CAAT	S000028
PmDXS1	CACTFTPPCA1	1168	(+)	YACT	S000449
PmDXS1	-300ELEMENT	1170	(-)	TGHAAARK	S000122
PmDXS1	DOFCOREZM	1170	(-)	AAAG	S000265
PmDXS1	GT1CONSENSUS	1171	(-)	GRWAAW	S000198
PmDXS1	GT1GMSCAM4	1171	(-)	GAAAAA	S000453
PmDXS1	EBOXBNNAPA	1189	(-)	CANNTG	S000144
PmDXS1	MYCCONSENSUSAT	1189	(-)	CANNTG	S000407
PmDXS1	MYCATERD1	1189	(-)	CATGTG	S000413
PmDXS1	EBOXBNNAPA	1189	(+)	CANNTG	S000144
PmDXS1	MYCATRD22	1189	(+)	CACATG	S000174
PmDXS1	MYCCONSENSUSAT	1189	(+)	CANNTG	S000407
PmDXS1	GATABOX	1194	(+)	GATA	S000039
PmDXS1	CACTFTPPCA1	1196	(+)	YACT	S000449
PmDXS1	CAATBOX1	1201	(+)	CAAT	S000028
PmDXS1	CACTFTPPCA1	1211	(+)	YACT	S000449
PmDXS1	WBOXHVISO1	1220	(-)	TGACT	S000442
PmDXS1	WBOXNTERF3	1220	(-)	TGACY	S000457
PmDXS1	WRKY71OS	1221	(-)	TGAC	S000447
PmDXS1	RAV1AAT	1245	(+)	CAACA	S000314
PmDXS1	ARR1AT	1265	(+)	NGATT	S000454
PmDXS1	CAATBOX1	1271	(-)	CAAT	S000028
PmDXS1	WBOXATNPR1	1279	(+)	TTGAC	S000390
PmDXS1	BIHD1OS	1280	(-)	TGTCA	S000498
PmDXS1	WRKY71OS	1280	(+)	TGAC	S000447
PmDXS1	CAATBOX1	1296	(+)	CAAT	S000028
PmDXS1	ACGTATERD1	1304	(-)	ACGT	S000415
PmDXS1	ACGTABREMOTIFA2OSEM	1304	(+)	ACGTGKC	S000394
PmDXS1	ABRELATERD1	1304	(+)	ACGTG	S000414
PmDXS1	ACGTATERD1	1304	(+)	ACGT	S000415
PmDXS1	GADOWNAT	1304	(+)	ACGTGTC	S000438
PmDXS1	SV40COREENHAN	1317	(-)	GTGGWWHG	S000123
PmDXS1	DOFCOREZM	1317	(-)	AAAG	S000265
PmDXS1	CACTFTPPCA1	1322	(+)	YACT	S000449
PmDXS1	BIHD1OS	1325	(-)	TGTCA	S000498
PmDXS1	WRKY71OS	1325	(+)	TGAC	S000447
PmDXS1	CACTFTPPCA1	1328	(+)	YACT	S000449
PmDXS1	NODCON2GM	1330	(+)	CTCTT	S000462
PmDXS1	OSE2ROOTNODULE	1330	(+)	CTCTT	S000468
PmDXS1	SV40COREENHAN	1332	(-)	GTGGWWHG	S000123
PmDXS1	DOFCOREZM	1332	(-)	AAAG	S000265
PmDXS1	CACTFTPPCA1	1337	(+)	YACT	S000449
PmDXS1	BIHD1OS	1340	(-)	TGTCA	S000498
PmDXS1	WRKY71OS	1340	(+)	TGAC	S000447
PmDXS1	CACTFTPPCA1	1343	(+)	YACT	S000449
PmDXS1	CACTFTPPCA1	1348	(-)	YACT	S000449
PmDXS1	RYREPEATLEGUMINBOX	1349	(-)	CATGCAY	S000100
PmDXS1	RYREPEATBNNAPA	1350	(-)	CATGCA	S000264
PmDXS1	WBOXNTERF3	1358	(-)	TGACY	S000457
PmDXS1	WRKY71OS	1359	(-)	TGAC	S000447
PmDXS1	POLASIG3	1362	(-)	AATAAT	S000088
PmDXS1	CAATBOX1	1365	(-)	CAAT	S000028
PmDXS1	CCAATBOX1	1365	(-)	CCAAT	S000030
PmDXS1	CURECORECR	1369	(-)	GTAC	S000493
PmDXS1	CURECORECR	1369	(+)	GTAC	S000493
PmDXS1	CACTFTPPCA1	1377	(-)	YACT	S000449
PmDXS1	CACTFTPPCA1	1381	(+)	YACT	S000449
PmDXS1	TBOXATGAPB	1382	(+)	ACTTTG	S000383
PmDXS1	DOFCOREZM	1383	(-)	AAAG	S000265
PmDXS1	CURECORECR	1393	(-)	GTAC	S000493
PmDXS1	CURECORECR	1393	(+)	GTAC	S000493
PmDXS1	S1FBOXSORPS1L21	1394	(-)	ATGGTA	S000223
PmDXS1	CAATBOX1	1398	(-)	CAAT	S000028
PmDXS1	CCAATBOX1	1398	(-)	CCAAT	S000030
PmDXS1	CACTFTPPCA1	1406	(-)	YACT	S000449
PmDXS1	GTGANTG10	1409	(+)	GTGA	S000378
PmDXS1	SURECOREATSULTR11	1423	(+)	GAGAC	S000499
PmDXS1	INRNTPSADB	1424	(-)	YTCANTYY	S000395
PmDXS1	POLASIG3	1431	(-)	AATAAT	S000088
PmDXS1	TATABOX5	1432	(+)	TTATTT	S000203
PmDXS1	CACTFTPPCA1	1438	(-)	YACT	S000449
PmDXS1	CACTFTPPCA1	1457	(+)	YACT	S000449
PmDXS1	PREATPRODH	1458	(+)	ACTCAT	S000450
PmDXS1	CCAATBOX1	1471	(+)	CCAAT	S000030
PmDXS1	CAATBOX1	1472	(+)	CAAT	S000028
PmDXS1	POLASIG3	1473	(+)	AATAAT	S000088
PmDXS1	ARR1AT	1476	(-)	NGATT	S000454
PmDXS1	RBCSCONSENSUS	1476	(+)	AATCCAA	S000127
PmDXS1	E2FCONSENSUS	1483	(-)	WTTSSCSS	S000476
PmDXS1	SORLIP2AT	1483	(+)	GGGCC	S000483
PmDXS1	CAREOSREP1	1493	(+)	CAACTC	S000421
PmDXS1	DPBFCOREDCDC3	1503	(-)	ACACNNG	S000292
PmDXS1	SEF3MOTIFGM	1518	(+)	AACCCA	S000115
PmDXS1	MYB1AT	1528	(-)	WAACCA	S000408
PmDXS1	GT1CORE	1529	(+)	GGTTAA	S000125
PmDXS1	MYBCORE	1532	(-)	CNGTTR	S000176
PmDXS1	DOFCOREZM	1545	(+)	AAAG	S000265
PmDXS1	CACTFTPPCA1	1547	(-)	YACT	S000449
PmDXS1	EECCRCAH1	1552	(-)	GANTTNC	S000494
PmDXS1	GT1CONSENSUS	1552	(+)	GRWAAW	S000198
PmDXS1	ARR1AT	1555	(-)	NGATT	S000454
PmDXS1	CACTFTPPCA1	1560	(-)	YACT	S000449
PmDXS1	NTBBF1ARROLB	1566	(+)	ACTTTA	S000273
PmDXS1	DOFCOREZM	1567	(-)	AAAG	S000265
PmDXS1	TAAAGSTKST1	1567	(-)	TAAAG	S000387
PmDXS1	ACGTATERD1	1572	(-)	ACGT	S000415
PmDXS1	ACGTATERD1	1572	(+)	ACGT	S000415
PmDXS1	DPBFCOREDCDC3	1578	(+)	ACACNNG	S000292
PmDXS1	ARR1AT	1596	(+)	NGATT	S000454
PmDXS1	CAATBOX1	1598	(-)	CAAT	S000028
PmDXS1	ARR1AT	1600	(+)	NGATT	S000454
PmDXS1	GATABOX	1608	(+)	GATA	S000039
PmDXS1	IBOX	1608	(+)	GATAAG	S000124
PmDXS1	IBOXCORE	1608	(+)	GATAA	S000199
PmDXS1	IBOXCORENT	1608	(+)	GATAAGR	S000424
PmDXS1	GATABOX	1613	(+)	GATA	S000039
PmDXS1	GT1CONSENSUS	1613	(+)	GRWAAW	S000198
PmDXS1	IBOXCORE	1613	(+)	GATAA	S000199
PmDXS1	GATABOX	1621	(+)	GATA	S000039
PmDXS1	GT1CONSENSUS	1621	(+)	GRWAAW	S000198
PmDXS1	IBOXCORE	1621	(+)	GATAA	S000199
PmDXS1	DOFCOREZM	1626	(+)	AAAG	S000265
PmDXS1	NODCON2GM	1630	(-)	CTCTT	S000462
PmDXS1	OSE2ROOTNODULE	1630	(-)	CTCTT	S000468
PmDXS1	EECCRCAH1	1640	(+)	GANTTNC	S000494
PmDXS1	DOFCOREZM	1651	(-)	AAAG	S000265
PmDXS1	CACTFTPPCA1	1655	(+)	YACT	S000449
PmDXS1	POLLEN1LELAT52	1666	(-)	AGAAA	S000245
PmDXS1	DOFCOREZM	1673	(-)	AAAG	S000265
PmDXS1	TAAAGSTKST1	1673	(-)	TAAAG	S000387
PmDXS1	EECCRCAH1	1681	(+)	GANTTNC	S000494
PmDXS1	POLLEN1LELAT52	1684	(-)	AGAAA	S000245
PmDXS1	CGACGOSAMY3	1690	(-)	CGACG	S000205
PmDXS1	IBOXCORE	1695	(-)	GATAA	S000199
PmDXS1	GATABOX	1696	(-)	GATA	S000039
PmDXS1	LTRECOREATCOR15	1702	(+)	CCGAC	S000153
PmHDR2	ARR1AT	11	(-)	NGATT	S000454
PmHDR2	NODCON1GM	12	(-)	AAAGAT	S000461
PmHDR2	OSE1ROOTNODULE	12	(-)	AAAGAT	S000467
PmHDR2	DOFCOREZM	14	(-)	AAAG	S000265
PmHDR2	EECCRCAH1	20	(+)	GANTTNC	S000494
PmHDR2	CACTFTPPCA1	29	(-)	YACT	S000449
PmHDR2	EBOXBNNAPA	40	(-)	CANNTG	S000144
PmHDR2	MYBCORE	40	(-)	CNGTTR	S000176
PmHDR2	MYCCONSENSUSAT	40	(-)	CANNTG	S000407
PmHDR2	EBOXBNNAPA	40	(+)	CANNTG	S000144
PmHDR2	MYCCONSENSUSAT	40	(+)	CANNTG	S000407
PmHDR2	MYB2CONSENSUSAT	40	(+)	YAACKG	S000409
PmHDR2	-10PEHVPSBD	50	(+)	TATTCT	S000392
PmHDR2	BOXIINTPATPB	52	(-)	ATAGAA	S000296
PmHDR2	GATABOX	55	(-)	GATA	S000039
PmHDR2	SURECOREATSULTR11	62	(-)	GAGAC	S000499
PmHDR2	EBOXBNNAPA	118	(-)	CANNTG	S000144
PmHDR2	MYCCONSENSUSAT	118	(-)	CANNTG	S000407
PmHDR2	EBOXBNNAPA	118	(+)	CANNTG	S000144
PmHDR2	MYCCONSENSUSAT	118	(+)	CANNTG	S000407
PmHDR2	ANAERO1CONSENSUS	120	(-)	AAACAAA	S000477
PmHDR2	E2FCONSENSUS	124	(+)	WTTSSCSS	S000476
PmHDR2	NODCON2GM	133	(+)	CTCTT	S000462
PmHDR2	OSE2ROOTNODULE	133	(+)	CTCTT	S000468
PmHDR2	CAATBOX1	150	(-)	CAAT	S000028
PmHDR2	WBOXHVISO1	176	(-)	TGACT	S000442
PmHDR2	WBOXNTERF3	176	(-)	TGACY	S000457
PmHDR2	WBOXATNPR1	177	(-)	TTGAC	S000390
PmHDR2	WRKY71OS	177	(-)	TGAC	S000447
PmHDR2	CAATBOX1	179	(+)	CAAT	S000028
PmHDR2	CACTFTPPCA1	186	(-)	YACT	S000449
PmHDR2	GTGANTG10	187	(+)	GTGA	S000378
PmHDR2	GT1CONSENSUS	192	(+)	GRWAAW	S000198
PmHDR2	SEF3MOTIFGM	197	(-)	AACCCA	S000115
PmHDR2	TATABOX5	201	(+)	TTATTT	S000203
PmHDR2	GTGANTG10	220	(+)	GTGA	S000378
PmHDR2	EBOXBNNAPA	236	(-)	CANNTG	S000144
PmHDR2	MYCCONSENSUSAT	236	(-)	CANNTG	S000407
PmHDR2	EBOXBNNAPA	236	(+)	CANNTG	S000144
PmHDR2	MYCCONSENSUSAT	236	(+)	CANNTG	S000407
PmHDR2	CACTFTPPCA1	236	(+)	YACT	S000449
PmHDR2	REALPHALGLHCB21	239	(-)	AACCAA	S000362
PmHDR2	GTGANTG10	256	(-)	GTGA	S000378
PmHDR2	ARR1AT	265	(+)	NGATT	S000454
PmHDR2	ARR1AT	277	(-)	NGATT	S000454
PmHDR2	RHERPATEXPA7	282	(+)	KCACGW	S000512
PmHDR2	GATABOX	286	(+)	GATA	S000039
PmHDR2	GATABOX	288	(-)	GATA	S000039
PmHDR2	TATABOX3	299	(+)	TATTAAT	S000110
PmHDR2	ARR1AT	303	(-)	NGATT	S000454
PmHDR2	MYBCORE	324	(+)	CNGTTR	S000176
PmHDR2	MYB1LEPR	326	(+)	GTTAGTT	S000443
PmHDR2	WBOXATNPR1	331	(+)	TTGAC	S000390
PmHDR2	GCN4OSGLUB1	332	(-)	TGAGTCA	S000277
PmHDR2	WBOXHVISO1	332	(+)	TGACT	S000442
PmHDR2	WRKY71OS	332	(+)	TGAC	S000447
PmHDR2	WBOXNTERF3	332	(+)	TGACY	S000457
PmHDR2	GTGANTG10	336	(-)	GTGA	S000378
PmHDR2	GATABOX	346	(+)	GATA	S000039
PmHDR2	ROOTMOTIFTAPOX1	347	(+)	ATATT	S000098
PmHDR2	MARTBOX	355	(-)	TTWTWTTWTT	S000067
PmHDR2	MARTBOX	356	(-)	TTWTWTTWTT	S000067
PmHDR2	GTGANTG10	368	(-)	GTGA	S000378
PmHDR2	CACTFTPPCA1	369	(+)	YACT	S000449
PmHDR2	POLASIG3	389	(-)	AATAAT	S000088
PmHDR2	CPBCSPOR	391	(+)	TATTAG	S000491
PmHDR2	CACTFTPPCA1	395	(-)	YACT	S000449
PmHDR2	CURECORECR	396	(-)	GTAC	S000493
PmHDR2	CURECORECR	396	(+)	GTAC	S000493
PmHDR2	CACTFTPPCA1	397	(+)	YACT	S000449
PmHDR2	ARR1AT	405	(+)	NGATT	S000454
PmHDR2	ARR1AT	419	(+)	NGATT	S000454
PmHDR2	ARR1AT	425	(-)	NGATT	S000454
PmHDR2	EBOXBNNAPA	433	(-)	CANNTG	S000144
PmHDR2	MYCCONSENSUSAT	433	(-)	CANNTG	S000407
PmHDR2	EBOXBNNAPA	433	(+)	CANNTG	S000144
PmHDR2	MYCCONSENSUSAT	433	(+)	CANNTG	S000407
PmHDR2	GTGANTG10	438	(+)	GTGA	S000378
PmHDR2	ARR1AT	439	(+)	NGATT	S000454
PmHDR2	POLLEN1LELAT52	442	(-)	AGAAA	S000245
PmHDR2	NAPINMOTIFBN	456	(+)	TACACAT	S000070
PmHDR2	SEF4MOTIFGM7S	461	(+)	RTTTTTR	S000103
PmHDR2	POLASIG2	464	(-)	AATTAAA	S000081
PmHDR2	PREATPRODH	472	(-)	ACTCAT	S000450
PmHDR2	CAREOSREP1	474	(-)	CAACTC	S000421
PmHDR2	REALPHALGLHCB21	477	(-)	AACCAA	S000362
PmHDR2	MYB1AT	478	(-)	WAACCA	S000408
PmHDR2	ROOTMOTIFTAPOX1	484	(-)	ATATT	S000098
PmHDR2	CACTFTPPCA1	488	(+)	YACT	S000449
PmHDR2	CARGCW8GAT	492	(-)	CWWWWWWWWG	S000431
PmHDR2	CARGCW8GAT	492	(+)	CWWWWWWWWG	S000431
PmHDR2	ROOTMOTIFTAPOX1	494	(-)	ATATT	S000098
PmHDR2	ROOTMOTIFTAPOX1	495	(+)	ATATT	S000098
PmHDR2	CPBCSPOR	496	(+)	TATTAG	S000491
PmHDR2	CACTFTPPCA1	500	(-)	YACT	S000449
PmHDR2	SORLIP1AT	501	(-)	GCCAC	S000482
PmHDR2	SURECOREATSULTR11	514	(-)	GAGAC	S000499
PmHDR2	INRNTPSADB	516	(+)	YTCANTYY	S000395
PmHDR2	CACTFTPPCA1	525	(+)	YACT	S000449
PmHDR2	CACTFTPPCA1	528	(+)	YACT	S000449
PmHDR2	CACTFTPPCA1	535	(+)	YACT	S000449
PmHDR2	GATABOX	540	(-)	GATA	S000039
PmHDR2	SORLIP1AT	549	(-)	GCCAC	S000482
PmHDR2	CACTFTPPCA1	562	(-)	YACT	S000449
PmHDR2	ARR1AT	565	(-)	NGATT	S000454
PmHDR2	ARR1AT	570	(-)	NGATT	S000454
PmHDR2	ROOTMOTIFTAPOX1	577	(-)	ATATT	S000098
PmHDR2	TGTCACACMCUCUMISIN	581	(-)	TGTCACA	S000422
PmHDR2	GTGANTG10	582	(+)	GTGA	S000378
PmHDR2	BIHD1OS	583	(-)	TGTCA	S000498
PmHDR2	WRKY71OS	583	(+)	TGAC	S000447
PmHDR2	CACTFTPPCA1	602	(-)	YACT	S000449
PmHDR2	SORLIP1AT	603	(-)	GCCAC	S000482
PmHDR2	SEF4MOTIFGM7S	615	(-)	RTTTTTR	S000103
PmHDR2	INRNTPSADB	617	(-)	YTCANTYY	S000395
PmHDR2	ARR1AT	623	(+)	NGATT	S000454
PmHDR2	CIACADIANLELHC	624	(-)	CAANNNNATC	S000252
PmHDR2	ANAERO1CONSENSUS	626	(-)	AAACAAA	S000477
PmHDR2	BIHD1OS	635	(+)	TGTCA	S000498
PmHDR2	WRKY71OS	636	(-)	TGAC	S000447
PmHDR2	GTGANTG10	637	(-)	GTGA	S000378
PmHDR2	CACTFTPPCA1	638	(+)	YACT	S000449
PmHDR2	GT1CONSENSUS	647	(-)	GRWAAW	S000198
PmHDR2	S1FBOXSORPS1L21	649	(-)	ATGGTA	S000223
PmHDR2	CAATBOX1	653	(-)	CAAT	S000028
PmHDR2	ARR1AT	661	(+)	NGATT	S000454
PmHDR2	AMYBOX1	665	(-)	TAACARA	S000020
PmHDR2	MYBGAHV	665	(-)	TAACAAA	S000181
PmHDR2	GAREAT	665	(-)	TAACAAR	S000439
PmHDR2	CACTFTPPCA1	671	(-)	YACT	S000449
PmHDR2	GTGANTG10	674	(+)	GTGA	S000378
PmHDR2	EECCRCAH1	676	(+)	GANTTNC	S000494
PmHDR2	POLLEN1LELAT52	679	(-)	AGAAA	S000245
PmHDR2	CAATBOX1	687	(-)	CAAT	S000028
PmHDR2	ARR1AT	700	(+)	NGATT	S000454
PmHDR2	CAATBOX1	702	(-)	CAAT	S000028
PmHDR2	WBOXATNPR1	703	(+)	TTGAC	S000390
PmHDR2	WBOXHVISO1	704	(+)	TGACT	S000442
PmHDR2	WRKY71OS	704	(+)	TGAC	S000447
PmHDR2	WBOXNTERF3	704	(+)	TGACY	S000457
PmHDR2	CCAATBOX1	720	(+)	CCAAT	S000030
PmHDR2	EBOXBNNAPA	721	(-)	CANNTG	S000144
PmHDR2	MYCCONSENSUSAT	721	(-)	CANNTG	S000407
PmHDR2	CAATBOX1	721	(+)	CAAT	S000028
PmHDR2	EBOXBNNAPA	721	(+)	CANNTG	S000144
PmHDR2	MYCCONSENSUSAT	721	(+)	CANNTG	S000407
PmHDR2	CAATBOX1	723	(-)	CAAT	S000028
PmHDR2	REALPHALGLHCB21	737	(-)	AACCAA	S000362
PmHDR2	POLLEN1LELAT52	752	(-)	AGAAA	S000245
PmHDR2	CARGATCONSENSUS	759	(-)	CCWWWWWWGG	S000404
PmHDR2	CARGATCONSENSUS	759	(+)	CCWWWWWWGG	S000404
PmHDR2	SEF4MOTIFGM7S	768	(+)	RTTTTTR	S000103
PmHDR2	CACTFTPPCA1	778	(-)	YACT	S000449
PmHDR2	CAATBOX1	787	(+)	CAAT	S000028
PmHDR2	SEF3MOTIFGM	794	(-)	AACCCA	S000115
PmHDR2	AACACOREOSGLUB1	797	(-)	AACAAAC	S000353
PmHDR2	RAV1AAT	800	(-)	CAACA	S000314
PmHDR2	SURECOREATSULTR11	807	(-)	GAGAC	S000499
PmHDR2	GTGANTG10	810	(-)	GTGA	S000378
PmHDR2	CACTFTPPCA1	811	(+)	YACT	S000449
PmHDR2	SORLIP1AT	815	(-)	GCCAC	S000482
PmMCT	ARR1AT	32	(-)	NGATT	S000454
PmMCT	CAATBOX1	35	(+)	CAAT	S000028
PmMCT	ARR1AT	36	(-)	NGATT	S000454
PmMCT	CAATBOX1	39	(+)	CAAT	S000028
PmMCT	CACTFTPPCA1	47	(-)	YACT	S000449
PmMCT	ARFAT	51	(-)	TGTCTC	S000270
PmMCT	SEBFCONSSTPR10A	51	(-)	YTGTCWC	S000391
PmMCT	SURECOREATSULTR11	51	(+)	GAGAC	S000499
PmMCT	SURECOREATSULTR11	57	(+)	GAGAC	S000499
PmMCT	GATABOX	62	(-)	GATA	S000039
PmMCT	MYBST1	62	(-)	GGATA	S000180
PmMCT	INTRONLOWER	65	(-)	TGCAGG	S000086
PmMCT	CAATBOX1	70	(-)	CAAT	S000028
PmMCT	TATABOX3	78	(+)	TATTAAT	S000110
PmMCT	ARR1AT	82	(-)	NGATT	S000454
PmMCT	TATABOX3	87	(+)	TATTAAT	S000110
PmMCT	TATABOX3	88	(-)	TATTAAT	S000110
PmMCT	ROOTMOTIFTAPOX1	91	(-)	ATATT	S000098
PmMCT	ROOTMOTIFTAPOX1	92	(+)	ATATT	S000098
PmMCT	ACGTATERD1	101	(-)	ACGT	S000415
PmMCT	ACGTATERD1	101	(+)	ACGT	S000415
PmMCT	DOFCOREZM	106	(+)	AAAG	S000265
PmMCT	NODCON1GM	106	(+)	AAAGAT	S000461
PmMCT	OSE1ROOTNODULE	106	(+)	AAAGAT	S000467
PmMCT	GATABOX	109	(+)	GATA	S000039
PmMCT	GT1CONSENSUS	109	(+)	GRWAAW	S000198
PmMCT	IBOXCORE	109	(+)	GATAA	S000199
PmMCT	SEF4MOTIFGM7S	111	(-)	RTTTTTR	S000103
PmMCT	ROOTMOTIFTAPOX1	115	(-)	ATATT	S000098
PmMCT	POLASIG3	124	(-)	AATAAT	S000088
PmMCT	TATABOX3	126	(+)	TATTAAT	S000110
PmMCT	SEF4MOTIFGM7S	143	(-)	RTTTTTR	S000103
PmMCT	TATABOX5	152	(-)	TTATTT	S000203
PmMCT	POLASIG1	153	(+)	AATAAA	S000080
PmMCT	SEF4MOTIFGM7S	155	(-)	RTTTTTR	S000103
PmMCT	TATABOX3	160	(-)	TATTAAT	S000110
PmMCT	ROOTMOTIFTAPOX1	163	(-)	ATATT	S000098
PmMCT	ROOTMOTIFTAPOX1	164	(+)	ATATT	S000098
PmMCT	TATABOX3	165	(+)	TATTAAT	S000110
PmMCT	TATABOX3	166	(-)	TATTAAT	S000110
PmMCT	POLASIG1	169	(+)	AATAAA	S000080
PmMCT	NODCON2GM	184	(+)	CTCTT	S000462
PmMCT	OSE2ROOTNODULE	184	(+)	CTCTT	S000468
PmMCT	DOFCOREZM	186	(-)	AAAG	S000265
PmMCT	ERELEE4	190	(-)	AWTTCAAA	S000037
PmMCT	ROOTMOTIFTAPOX1	195	(-)	ATATT	S000098
PmMCT	MARTBOX	200	(-)	TTWTWTTWTT	S000067
PmMCT	TATABOX5	204	(-)	TTATTT	S000203
PmMCT	WUSATAg	211	(+)	TTAATGG	S000433
PmMCT	DOFCOREZM	220	(+)	AAAG	S000265
PmMCT	ANAERO2CONSENSUS	223	(-)	AGCAGC	S000478
PmMCT	RAV1AAT	237	(+)	CAACA	S000314
PmMCT	ARR1AT	261	(+)	NGATT	S000454
PmMCT	CIACADIANLELHC	262	(-)	CAANNNNATC	S000252
PmMCT	EECCRCAH1	262	(+)	GANTTNC	S000494
PmMCT	GT1CONSENSUS	263	(-)	GRWAAW	S000198
PmMCT	POLLEN1LELAT52	265	(-)	AGAAA	S000245
PmMCT	ROOTMOTIFTAPOX1	275	(-)	ATATT	S000098
PmMCT	ROOTMOTIFTAPOX1	276	(+)	ATATT	S000098
PmMCT	SEF4MOTIFGM7S	280	(-)	RTTTTTR	S000103
PmMCT	MARTBOX	281	(-)	TTWTWTTWTT	S000067
PmMCT	ROOTMOTIFTAPOX1	284	(-)	ATATT	S000098
PmMCT	ROOTMOTIFTAPOX1	289	(-)	ATATT	S000098
PmMCT	ROOTMOTIFTAPOX1	294	(+)	ATATT	S000098
PmMCT	TATABOX4	297	(-)	TATATAA	S000111
PmMCT	TATABOX4	300	(+)	TATATAA	S000111
PmMCT	POLLEN1LELAT52	310	(+)	AGAAA	S000245
PmMCT	GT1CONSENSUS	311	(+)	GRWAAW	S000198
PmMCT	GT1GMSCAM4	311	(+)	GAAAAA	S000453
PmMCT	POLASIG2	317	(+)	AATTAAA	S000081
PmMCT	ELRECOREPCRP1	329	(-)	TTGACC	S000142
PmMCT	WBOXNTERF3	329	(-)	TGACY	S000457
PmMCT	WBOXATNPR1	330	(-)	TTGAC	S000390
PmMCT	WRKY71OS	330	(-)	TGAC	S000447
PmMCT	BOXLCOREDCPAL	334	(+)	ACCWWCC	S000492
PmMCT	NTBBF1ARROLB	343	(-)	ACTTTA	S000273
PmMCT	TAAAGSTKST1	343	(+)	TAAAG	S000387
PmMCT	DOFCOREZM	344	(+)	AAAG	S000265
PmMCT	WBOXHVISO1	346	(-)	TGACT	S000442
PmMCT	WBOXNTERF3	346	(-)	TGACY	S000457
PmMCT	WBOXATNPR1	347	(-)	TTGAC	S000390
PmMCT	WRKY71OS	347	(-)	TGAC	S000447
PmMCT	CAATBOX1	349	(+)	CAAT	S000028
PmMCT	POLASIG1	350	(+)	AATAAA	S000080
PmMCT	GTGANTG10	357	(+)	GTGA	S000378
PmMCT	POLASIG1	360	(+)	AATAAA	S000080
PmMCT	ARR1AT	364	(-)	NGATT	S000454
PmMCT	GTGANTG10	366	(-)	GTGA	S000378
PmMCT	CACTFTPPCA1	367	(+)	YACT	S000449
PmMCT	TATCCAOSAMY	370	(-)	TATCCA	S000403
PmMCT	MYBST1	371	(+)	GGATA	S000180
PmMCT	GATABOX	372	(+)	GATA	S000039
PmMCT	CACTFTPPCA1	376	(+)	YACT	S000449
PmMCT	CACTFTPPCA1	386	(-)	YACT	S000449
PmMCT	CACTFTPPCA1	393	(+)	YACT	S000449
PmMCT	ARR1AT	399	(-)	NGATT	S000454
PmMCT	EBOXBNNAPA	406	(-)	CANNTG	S000144
PmMCT	MYCCONSENSUSAT	406	(-)	CANNTG	S000407
PmMCT	CAATBOX1	406	(+)	CAAT	S000028
PmMCT	EBOXBNNAPA	406	(+)	CANNTG	S000144
PmMCT	MYCCONSENSUSAT	406	(+)	CANNTG	S000407
PmMCT	CAATBOX1	408	(-)	CAAT	S000028
PmMCT	CACTFTPPCA1	421	(+)	YACT	S000449
PmMCT	CAATBOX1	430	(+)	CAAT	S000028
PmMCT	ARR1AT	431	(-)	NGATT	S000454
PmMCT	RBCSCONSENSUS	431	(+)	AATCCAA	S000127
PmMCT	MYB1LEPR	441	(+)	GTTAGTT	S000443
PmMCT	CCAATBOX1	459	(+)	CCAAT	S000030
PmMCT	CAATBOX1	460	(+)	CAAT	S000028
PmMCT	ARR1AT	464	(+)	NGATT	S000454
PmMCT	GTGANTG10	490	(-)	GTGA	S000378
PmMCT	CACTFTPPCA1	504	(+)	YACT	S000449
PmMCT	EBOXBNNAPA	511	(-)	CANNTG	S000144
PmMCT	MYCCONSENSUSAT	511	(-)	CANNTG	S000407
PmMCT	EBOXBNNAPA	511	(+)	CANNTG	S000144
PmMCT	MYCCONSENSUSAT	511	(+)	CANNTG	S000407
PmMCT	CACTFTPPCA1	513	(-)	YACT	S000449
PmMCT	GTGANTG10	514	(+)	GTGA	S000378
PmMCT	GT1CONSENSUS	524	(-)	GRWAAW	S000198
PmMCT	PYRIMIDINEBOXOSRAMY1A	529	(+)	CCTTTT	S000259
PmMCT	DOFCOREZM	530	(-)	AAAG	S000265
PmMCT	GT1CONSENSUS	531	(-)	GRWAAW	S000198
PmMCT	GT1GMSCAM4	531	(-)	GAAAAA	S000453
PmMCT	POLLEN1LELAT52	533	(-)	AGAAA	S000245
PmMCT	DOFCOREZM	536	(-)	AAAG	S000265
PmMCT	SORLIP2AT	541	(+)	GGGCC	S000483
PmMCT	ANAERO3CONSENSUS	554	(-)	TCATCAC	S000479
PmMCT	GTGANTG10	554	(+)	GTGA	S000378
PmMCT	INRNTPSADB	559	(-)	YTCANTYY	S000395
PmMCT	ANAERO2CONSENSUS	572	(+)	AGCAGC	S000478
PmDXS2	GCCCORE	11	(+)	GCCGCC	S000430
PmDXS2	E2FCONSENSUS	12	(-)	WTTSSCSS	S000476
PmDXS2	NONAMERMOTIFTAH3H4	20	(+)	CATCCAACG	S000071
PmDXS2	CGCGBOXAT	45	(-)	VCGCGB	S000501
PmDXS2	CGCGBOXAT	45	(+)	VCGCGB	S000501
PmDXS2	ARR1AT	52	(+)	NGATT	S000454
PmDXS2	POLLEN1LELAT52	62	(+)	AGAAA	S000245
PmDXS2	ACGTTBOX	66	(-)	AACGTT	S000132
PmDXS2	ACGTTBOX	66	(+)	AACGTT	S000132
PmDXS2	ACGTATERD1	67	(-)	ACGT	S000415
PmDXS2	ACGTATERD1	67	(+)	ACGT	S000415
PmDXS2	POLLEN1LELAT52	81	(+)	AGAAA	S000245
PmDXS2	GT1CONSENSUS	82	(+)	GRWAAW	S000198
PmDXS2	CAATBOX1	86	(-)	CAAT	S000028
PmDXS2	CAATBOX1	90	(+)	CAAT	S000028
PmDXS2	ARR1AT	91	(-)	NGATT	S000454
PmDXS2	NODCON1GM	92	(-)	AAAGAT	S000461
PmDXS2	OSE1ROOTNODULE	92	(-)	AAAGAT	S000467
PmDXS2	-300ELEMENT	94	(-)	TGHAAARK	S000122
PmDXS2	DOFCOREZM	94	(-)	AAAG	S000265
PmDXS2	XYLAT	110	(+)	ACAAAGAA	S000510
PmDXS2	DOFCOREZM	112	(+)	AAAG	S000265
PmDXS2	PYRIMIDINEBOXOSRAMY1A	120	(+)	CCTTTT	S000259
PmDXS2	DOFCOREZM	121	(-)	AAAG	S000265
PmDXS2	SORLIP1AT	127	(+)	GCCAC	S000482
PmDXS2	EBOXBNNAPA	129	(-)	CANNTG	S000144
PmDXS2	MYCCONSENSUSAT	129	(-)	CANNTG	S000407
PmDXS2	EBOXBNNAPA	129	(+)	CANNTG	S000144
PmDXS2	RAV1BAT	129	(+)	CACCTG	S000315
PmDXS2	MYCCONSENSUSAT	129	(+)	CANNTG	S000407
PmDXS2	DOFCOREZM	135	(-)	AAAG	S000265
PmDXS2	INRNTPSADB	137	(+)	YTCANTYY	S000395
PmDXS2	ARR1AT	151	(-)	NGATT	S000454
PmDXS2	CAATBOX1	155	(-)	CAAT	S000028
PmDXS2	CURECORECR	168	(-)	GTAC	S000493
PmDXS2	CURECORECR	168	(+)	GTAC	S000493
PmDXS2	CACTFTPPCA1	169	(+)	YACT	S000449
PmDXS2	CPBCSPOR	171	(-)	TATTAG	S000491
PmDXS2	POLASIG1	173	(+)	AATAAA	S000080
PmDXS2	SURECOREATSULTR11	182	(-)	GAGAC	S000499
PmDXS2	GATABOX	188	(-)	GATA	S000039
PmDXS2	MYBST1	188	(-)	GGATA	S000180
PmDXS2	GTGANTG10	203	(-)	GTGA	S000378
PmDXS2	CCAATBOX1	206	(+)	CCAAT	S000030
PmDXS2	CAATBOX1	207	(+)	CAAT	S000028
PmDXS2	SORLIP1AT	215	(+)	GCCAC	S000482
PmDXS2	CACTFTPPCA1	217	(+)	YACT	S000449
PmDXS2	GATABOX	220	(-)	GATA	S000039
PmDXS2	TBOXATGAPB	223	(-)	ACTTTG	S000383
PmDXS2	DOFCOREZM	224	(+)	AAAG	S000265
PmDXS2	CACTFTPPCA1	232	(-)	YACT	S000449
PmDXS2	GTGANTG10	233	(+)	GTGA	S000378
PmDXS2	BIHD1OS	238	(+)	TGTCA	S000498
PmDXS2	WRKY71OS	239	(-)	TGAC	S000447
PmDXS2	ARR1AT	242	(+)	NGATT	S000454
PmDXS2	POLLEN1LELAT52	245	(-)	AGAAA	S000245
PmDXS2	CAATBOX1	256	(-)	CAAT	S000028
PmDXS2	CAATBOX1	261	(-)	CAAT	S000028
PmDXS2	RBCSCONSENSUS	271	(-)	AATCCAA	S000127
PmDXS2	ARR1AT	273	(+)	NGATT	S000454
PmDXS2	CAATBOX1	275	(-)	CAAT	S000028
PmDXS2	CAATBOX2	281	(-)	GGCCAATCT	S000029
PmDXS2	ARR1AT	281	(+)	NGATT	S000454
PmDXS2	CAATBOX1	283	(-)	CAAT	S000028
PmDXS2	CCAATBOX1	283	(-)	CCAAT	S000030
PmDXS2	TATABOX2	301	(-)	TATAAAT	S000109
PmDXS2	GATABOX	306	(-)	GATA	S000039
PmDXS2	NODCON2GM	309	(+)	CTCTT	S000462
PmDXS2	OSE2ROOTNODULE	309	(+)	CTCTT	S000468
PmDXS2	GTGANTG10	351	(+)	GTGA	S000378
PmDXS2	POLASIG1	354	(+)	AATAAA	S000080
PmDXS2	SEF4MOTIFGM7S	356	(-)	RTTTTTR	S000103
PmDXS2	ARR1AT	360	(-)	NGATT	S000454
PmDXS2	ACGTATERD1	368	(-)	ACGT	S000415
PmDXS2	ACGTATERD1	368	(+)	ACGT	S000415
PmDXS2	CAATBOX1	374	(-)	CAAT	S000028
PmDXS2	CCAATBOX1	374	(-)	CCAAT	S000030
PmDXS2	CAATBOX1	381	(-)	CAAT	S000028
PmDXS2	CAATBOX1	387	(-)	CAAT	S000028
PmDXS2	CACTFTPPCA1	397	(-)	YACT	S000449
PmDXS2	DOFCOREZM	403	(+)	AAAG	S000265
PmDXS2	CACTFTPPCA1	405	(-)	YACT	S000449
PmDXS2	CURECORECR	406	(-)	GTAC	S000493
PmDXS2	CURECORECR	406	(+)	GTAC	S000493
PmDXS2	POLLEN1LELAT52	412	(+)	AGAAA	S000245
PmDXS2	ROOTMOTIFTAPOX1	422	(-)	ATATT	S000098
PmDXS2	ROOTMOTIFTAPOX1	423	(+)	ATATT	S000098
PmDXS2	CAATBOX1	425	(-)	CAAT	S000028
PmDXS2	BIHD1OS	427	(+)	TGTCA	S000498
PmDXS2	WRKY71OS	428	(-)	TGAC	S000447
PmDXS2	CACTFTPPCA1	431	(-)	YACT	S000449
PmDXS2	TATABOX5	437	(+)	TTATTT	S000203
PmDXS2	TATABOX5	450	(+)	TTATTT	S000203
PmDXS2	SEF4MOTIFGM7S	452	(+)	RTTTTTR	S000103
PmDXS2	DOFCOREZM	473	(-)	AAAG	S000265
PmDXS2	ANAERO1CONSENSUS	474	(-)	AAACAAA	S000477
PmDXS2	CACTFTPPCA1	488	(-)	YACT	S000449
PmDXS2	CACTFTPPCA1	493	(+)	YACT	S000449
PmDXS2	NTBBF1ARROLB	494	(+)	ACTTTA	S000273
PmDXS2	DOFCOREZM	495	(-)	AAAG	S000265
PmDXS2	TAAAGSTKST1	495	(-)	TAAAG	S000387
PmDXS2	ARR1AT	499	(-)	NGATT	S000454
PmDXS2	RAV1AAT	513	(-)	CAACA	S000314
PmDXS2	POLASIG3	523	(+)	AATAAT	S000088
PmDXS2	CACTFTPPCA1	528	(+)	YACT	S000449
PmDXS2	GAREAT	530	(-)	TAACAAR	S000439
PmDXS2	CACTFTPPCA1	535	(+)	YACT	S000449
PmDXS2	TATABOX4	541	(+)	TATATAA	S000111
PmDXS2	SITEIOSPCNA	550	(-)	CCAGGTGG	S000224
PmDXS2	EBOXBNNAPA	551	(-)	CANNTG	S000144
PmDXS2	MYCCONSENSUSAT	551	(-)	CANNTG	S000407
PmDXS2	EBOXBNNAPA	551	(+)	CANNTG	S000144
PmDXS2	RAV1BAT	551	(+)	CACCTG	S000315
PmDXS2	MYCCONSENSUSAT	551	(+)	CANNTG	S000407
PmDXS2	MARTBOX	560	(+)	TTWTWTTWTT	S000067
PmDXS2	MARTBOX	561	(+)	TTWTWTTWTT	S000067
PmDXS2	MARTBOX	562	(+)	TTWTWTTWTT	S000067
PmDXS2	MARTBOX	563	(+)	TTWTWTTWTT	S000067
PmDXS2	POLASIG2	570	(-)	AATTAAA	S000081
PmDXS2	ARR1AT	578	(+)	NGATT	S000454
PmDXS2	DPBFCOREDCDC3	583	(-)	ACACNNG	S000292
PmDXS2	EECCRCAH1	603	(-)	GANTTNC	S000494
PmDXS2	SURECOREATSULTR11	610	(-)	GAGAC	S000499
PmDXS2	CAATBOX1	614	(+)	CAAT	S000028
PmDXS2	ROOTMOTIFTAPOX1	615	(-)	ATATT	S000098
PmDXS2	INRNTPSADB	624	(+)	YTCANTYY	S000395
PmDXS2	CARGCW8GAT	626	(-)	CWWWWWWWWG	S000431
PmDXS2	CAATBOX1	626	(+)	CAAT	S000028
PmDXS2	CARGCW8GAT	626	(+)	CWWWWWWWWG	S000431
PmDXS2	TATABOX2	628	(-)	TATAAAT	S000109
PmDXS2	SORLIP2AT	635	(+)	GGGCC	S000483
PmDXS2	SORLIP1AT	637	(+)	GCCAC	S000482
PmDXS2	CACTFTPPCA1	639	(+)	YACT	S000449
PmDXS2	MYB1AT	642	(-)	WAACCA	S000408
PmDXS2	EBOXBNNAPA	693	(-)	CANNTG	S000144
PmDXS2	MYCCONSENSUSAT	693	(-)	CANNTG	S000407
PmDXS2	CAATBOX1	693	(+)	CAAT	S000028
PmDXS2	EBOXBNNAPA	693	(+)	CANNTG	S000144
PmDXS2	MYCCONSENSUSAT	693	(+)	CANNTG	S000407
PmDXS2	CAATBOX1	695	(-)	CAAT	S000028
PmDXS2	BIHD1OS	697	(+)	TGTCA	S000498
PmDXS2	WBOXATNPR1	698	(-)	TTGAC	S000390
PmDXS2	WRKY71OS	698	(-)	TGAC	S000447
PmDXS2	CIACADIANLELHC	700	(+)	CAANNNNATC	S000252
PmDXS2	DOFCOREZM	701	(+)	AAAG	S000265
PmDXS2	NODCON1GM	701	(+)	AAAGAT	S000461
PmDXS2	OSE1ROOTNODULE	701	(+)	AAAGAT	S000467
PmDXS2	GATABOX	704	(+)	GATA	S000039
PmDXS2	GATABOX	706	(-)	GATA	S000039
PmDXS2	INRNTPSADB	712	(+)	YTCANTYY	S000395
PmDXS2	CAATBOX1	714	(+)	CAAT	S000028
PmDXS2	CIACADIANLELHC	714	(+)	CAANNNNATC	S000252
PmDXS2	ARR1AT	715	(-)	NGATT	S000454
PmDXS2	ARR1AT	720	(-)	NGATT	S000454
PmDXS2	NODCON2GM	727	(-)	CTCTT	S000462
PmDXS2	OSE2ROOTNODULE	727	(-)	CTCTT	S000468
PmDXS2	POLLEN1LELAT52	730	(+)	AGAAA	S000245
PmDXR	EBOXBNNAPA	5	(-)	CANNTG	S000144
PmDXR	MYCCONSENSUSAT	5	(-)	CANNTG	S000407
PmDXR	EBOXBNNAPA	5	(+)	CANNTG	S000144
PmDXR	MYCCONSENSUSAT	5	(+)	CANNTG	S000407
PmDXR	CCAATBOX1	11	(+)	CCAAT	S000030
PmDXR	CAATBOX1	12	(+)	CAAT	S000028
PmDXR	ELRECOREPCRP1	16	(-)	TTGACC	S000142
PmDXR	WBBOXPCWRKY1	16	(-)	TTTGACY	S000310
PmDXR	WBOXNTERF3	16	(-)	TGACY	S000457
PmDXR	WBOXATNPR1	17	(-)	TTGAC	S000390
PmDXR	WRKY71OS	17	(-)	TGAC	S000447
PmDXR	SEF3MOTIFGM	22	(+)	AACCCA	S000115
PmDXR	WUSATAg	25	(-)	TTAATGG	S000433
PmDXR	DOFCOREZM	37	(+)	AAAG	S000265
PmDXR	CACTFTPPCA1	39	(-)	YACT	S000449
PmDXR	SEF4MOTIFGM7S	72	(+)	RTTTTTR	S000103
PmDXR	RBCSCONSENSUS	76	(-)	AATCCAA	S000127
PmDXR	ARR1AT	78	(+)	NGATT	S000454
PmDXR	CACTFTPPCA1	93	(+)	YACT	S000449
PmDXR	NTBBF1ARROLB	94	(+)	ACTTTA	S000273
PmDXR	DOFCOREZM	95	(-)	AAAG	S000265
PmDXR	TAAAGSTKST1	95	(-)	TAAAG	S000387
PmDXR	ROOTMOTIFTAPOX1	108	(-)	ATATT	S000098
PmDXR	GATABOX	110	(-)	GATA	S000039
PmDXR	RGATAOS	110	(-)	CAGAAGATA	S000191
PmDXR	CAATBOX1	128	(+)	CAAT	S000028
PmDXR	DRE2COREZMRAB17	136	(+)	ACCGAC	S000402
PmDXR	DRECRTCOREAT	136	(+)	RCCGAC	S000418
PmDXR	CBFHV	136	(+)	RYCGAC	S000497
PmDXR	LTRECOREATCOR15	137	(+)	CCGAC	S000153
PmDXR	NODCON2GM	145	(-)	CTCTT	S000462
PmDXR	OSE2ROOTNODULE	145	(-)	CTCTT	S000468
PmDXR	NODCON1GM	150	(-)	AAAGAT	S000461
PmDXR	OSE1ROOTNODULE	150	(-)	AAAGAT	S000467
PmDXR	DOFCOREZM	152	(-)	AAAG	S000265
PmDXR	TAAAGSTKST1	152	(-)	TAAAG	S000387
PmDXR	NODCON2GM	156	(-)	CTCTT	S000462
PmDXR	OSE2ROOTNODULE	156	(-)	CTCTT	S000468
PmDXR	CACTFTPPCA1	159	(-)	YACT	S000449
PmDXR	GTGANTG10	167	(+)	GTGA	S000378
PmDXR	TAAAGSTKST1	194	(+)	TAAAG	S000387
PmDXR	DOFCOREZM	195	(+)	AAAG	S000265
PmDXR	INRNTPSADB	204	(-)	YTCANTYY	S000395
PmDXR	NODCON2GM	215	(-)	CTCTT	S000462
PmDXR	OSE2ROOTNODULE	215	(-)	CTCTT	S000468
PmDXR	DOFCOREZM	233	(-)	AAAG	S000265
PmDXR	ARR1AT	250	(-)	NGATT	S000454
PmDXR	POLASIG2	258	(+)	AATTAAA	S000081
PmDXR	DOFCOREZM	264	(+)	AAAG	S000265
PmDXR	REALPHALGLHCB21	280	(-)	AACCAA	S000362
PmDXR	MYB1AT	281	(-)	WAACCA	S000408
PmDXR	ARR1AT	293	(-)	NGATT	S000454
PmDXR	POLLEN1LELAT52	307	(-)	AGAAA	S000245
PmDXR	DOFCOREZM	310	(-)	AAAG	S000265
PmDXR	POLLEN1LELAT52	311	(-)	AGAAA	S000245
PmDXR	BOXLCOREDCPAL	323	(+)	ACCWWCC	S000492
PmDXR	MYBPZM	324	(+)	CCWACC	S000179
PmDXR	CACTFTPPCA1	329	(+)	YACT	S000449
PmDXR	GTGANTG10	333	(+)	GTGA	S000378
PmDXR	CAREOSREP1	339	(-)	CAACTC	S000421
PmDXR	EECCRCAH1	339	(+)	GANTTNC	S000494
PmDXR	ARR1AT	359	(+)	NGATT	S000454
PmDXR	CACTFTPPCA1	391	(-)	YACT	S000449
PmDXR	GTGANTG10	392	(+)	GTGA	S000378
PmDXR	NODCON2GM	395	(-)	CTCTT	S000462
PmDXR	OSE2ROOTNODULE	395	(-)	CTCTT	S000468
PmDXR	SURECOREATSULTR11	397	(+)	GAGAC	S000499
PmDXR	EECCRCAH1	411	(+)	GANTTNC	S000494
PmDXR	GTGANTG10	416	(-)	GTGA	S000378
PmDXR	ROOTMOTIFTAPOX1	423	(-)	ATATT	S000098
PmDXR	TATAPVTRNALEU	425	(-)	TTTATATA	S000340
PmDXR	TATABOX4	425	(+)	TATATAA	S000111
PmDXR	ARR1AT	443	(+)	NGATT	S000454
PmDXR	CAATBOX1	445	(-)	CAAT	S000028
PmDXR	CCAATBOX1	445	(-)	CCAAT	S000030
PmDXR	SURECOREATSULTR11	449	(-)	GAGAC	S000499
PmDXR	GTGANTG10	452	(-)	GTGA	S000378
PmDXR	DOFCOREZM	456	(+)	AAAG	S000265
PmDXR	NODCON2GM	472	(-)	CTCTT	S000462
PmDXR	OSE2ROOTNODULE	472	(-)	CTCTT	S000468
PmDXR	POLLEN1LELAT52	478	(-)	AGAAA	S000245
PmDXR	RYREPEATLEGUMINBOX	496	(-)	CATGCAY	S000100
PmDXR	RYREPEATGMGY2	496	(-)	CATGCAT	S000105
PmDXR	RYREPEATBNNAPA	497	(-)	CATGCA	S000264
PmDXR	BIHD1OS	513	(-)	TGTCA	S000498
PmDXR	WRKY71OS	513	(+)	TGAC	S000447
PmDXR	DOFCOREZM	518	(+)	AAAG	S000265
PmDXR	ARR1AT	532	(+)	NGATT	S000454
PmDXR	CAATBOX1	538	(+)	CAAT	S000028
PmDXR	RAV1AAT	548	(+)	CAACA	S000314
PmDXR	CAATBOX1	551	(+)	CAAT	S000028
PmDXR	ARR1AT	571	(+)	NGATT	S000454
PmDXR	ANAERO1CONSENSUS	577	(+)	AAACAAA	S000477
PmDXR	CCA1ATLHCB1	602	(+)	AAMAATCT	S000149
PmDXR	ARR1AT	605	(-)	NGATT	S000454
PmDXR	SORLIP1AT	622	(-)	GCCAC	S000482
PmDXR	CACTFTPPCA1	627	(-)	YACT	S000449
PmDXR	SORLIP1AT	628	(-)	GCCAC	S000482
PmDXR	TELOBOXATEEF1AA1	641	(-)	AAACCCTAA	S000308
PmDXR	UP2ATMSD	642	(-)	AAACCCTA	S000472
PmDXR	PRECONSCRHSP70A	655	(+)	SCGAYNRNNNNNNNNNNNNNNNHD	S000506
PmDXR	GATABOX	657	(+)	GATA	S000039
PmDXR	IBOXCORE	657	(+)	GATAA	S000199
PmDXR	SEF4MOTIFGM7S	663	(-)	RTTTTTR	S000103
PmDXR	ARR1AT	672	(+)	NGATT	S000454
PmDXR	POLASIG2	675	(-)	AATTAAA	S000081
PmDXR	-300ELEMENT	679	(-)	TGHAAARK	S000122
PmDXR	GT1CONSENSUS	680	(-)	GRWAAW	S000198
PmDXR	GT1GMSCAM4	680	(-)	GAAAAA	S000453
PmDXR	ROOTMOTIFTAPOX1	686	(+)	ATATT	S000098
PmDXR	SEF4MOTIFGM7S	688	(+)	RTTTTTR	S000103
PmDXR	POLASIG1	691	(-)	AATAAA	S000080
PmDXR	TATABOX5	692	(+)	TTATTT	S000203
PmDXR	CEREGLUBOX2PSLEGA	699	(+)	TGAAAACT	S000033
PmDXR	CACTFTPPCA1	706	(+)	YACT	S000449
PmDXR	NODCON2GM	708	(+)	CTCTT	S000462
PmDXR	OSE2ROOTNODULE	708	(+)	CTCTT	S000468
PmDXR	TATABOX5	714	(-)	TTATTT	S000203
PmDXR	POLASIG1	715	(+)	AATAAA	S000080
PmDXR	ARR1AT	719	(-)	NGATT	S000454
PmDXR	INRNTPSADB	722	(+)	YTCANTYY	S000395
PmDXR	CAATBOX1	724	(+)	CAAT	S000028
PmDXR	DOFCOREZM	729	(-)	AAAG	S000265
PmDXR	TAAAGSTKST1	729	(-)	TAAAG	S000387
PmDXR	POLASIG1	730	(-)	AATAAA	S000080
PmDXR	TATABOX5	731	(+)	TTATTT	S000203
PmDXR	POLLEN1LELAT52	734	(-)	AGAAA	S000245
PmDXR	CPBCSPOR	737	(-)	TATTAG	S000491
PmDXR	HDZIP2ATATHB2	738	(+)	TAATMATTA	S000373
PmDXR	POLASIG3	739	(+)	AATAAT	S000088
PmDXR	HDZIP2ATATHB2	741	(-)	TAATMATTA	S000373
PmDXR	POLASIG3	743	(-)	AATAAT	S000088
PmDXR	SEF4MOTIFGM7S	748	(-)	RTTTTTR	S000103
PmDXR	ROOTMOTIFTAPOX1	752	(-)	ATATT	S000098
PmDXR	ROOTMOTIFTAPOX1	753	(+)	ATATT	S000098
PmDXR	ERELEE4	757	(-)	AWTTCAAA	S000037
PmDXR	POLASIG3	763	(-)	AATAAT	S000088
PmDXR	POLASIG3	771	(-)	AATAAT	S000088
PmDXR	LECPLEACS2	776	(+)	TAAAATAT	S000465
PmDXR	ROOTMOTIFTAPOX1	779	(-)	ATATT	S000098
PmDXR	ROOTMOTIFTAPOX1	780	(+)	ATATT	S000098
PmDXR	MYBCORE	785	(+)	CNGTTR	S000176
PmDXR	SORLIP2AT	808	(-)	GGGCC	S000483
PmDXR	CACTFTPPCA1	822	(+)	YACT	S000449
PmDXR	NTBBF1ARROLB	823	(+)	ACTTTA	S000273
PmDXR	DOFCOREZM	824	(-)	AAAG	S000265
PmDXR	TAAAGSTKST1	824	(-)	TAAAG	S000387
PmDXR	SP8BFIBSP8BIB	827	(+)	TACTATT	S000184
PmDXR	CACTFTPPCA1	827	(+)	YACT	S000449
PmDXR	GT1CONSENSUS	831	(-)	GRWAAW	S000198
PmDXR	IBOXCORE	832	(-)	GATAA	S000199
PmDXR	GATABOX	833	(-)	GATA	S000039
PmDXR	WBOXHVISO1	838	(-)	TGACT	S000442
PmDXR	WBOXNTERF3	838	(-)	TGACY	S000457
PmDXR	WBOXATNPR1	839	(-)	TTGAC	S000390
PmDXR	WRKY71OS	839	(-)	TGAC	S000447
PmDXR	RAV1AAT	841	(+)	CAACA	S000314
PmDXR	GT1CONSENSUS	848	(-)	GRWAAW	S000198
PmDXR	IBOXCORE	849	(-)	GATAA	S000199
PmDXR	GATABOX	850	(-)	GATA	S000039
PmDXR	WBOXHVISO1	855	(-)	TGACT	S000442
PmDXR	WBOXNTERF3	855	(-)	TGACY	S000457
PmDXR	WBOXATNPR1	856	(-)	TTGAC	S000390
PmDXR	WRKY71OS	856	(-)	TGAC	S000447
PmDXR	RAV1AAT	858	(+)	CAACA	S000314
PmDXR	MYB1LEPR	869	(+)	GTTAGTT	S000443
PmDXR	BOXIINTPATPB	882	(+)	ATAGAA	S000296
PmDXR	CACTFTPPCA1	887	(-)	YACT	S000449
PmDXR	GTGANTG10	888	(+)	GTGA	S000378
PmDXR	BIHD1OS	889	(-)	TGTCA	S000498
PmDXR	WRKY71OS	889	(+)	TGAC	S000447
PmDXR	DPBFCOREDCDC3	891	(+)	ACACNNG	S000292
PmDXR	EBOXBNNAPA	892	(-)	CANNTG	S000144
PmDXR	MYCCONSENSUSAT	892	(-)	CANNTG	S000407
PmDXR	MYCATERD1	892	(-)	CATGTG	S000413
PmDXR	EBOXBNNAPA	892	(+)	CANNTG	S000144
PmDXR	MYCATRD22	892	(+)	CACATG	S000174
PmDXR	MYCCONSENSUSAT	892	(+)	CANNTG	S000407
PmDXR	CURECORECR	897	(-)	GTAC	S000493
PmDXR	CURECORECR	897	(+)	GTAC	S000493
PmDXR	MYBCORE	900	(-)	CNGTTR	S000176
PmDXR	MYB2CONSENSUSAT	900	(+)	YAACKG	S000409
PmDXR	MYBCOREATCYCB1	901	(+)	AACGG	S000502
PmDXR	GT1CONSENSUS	911	(+)	GRWAAW	S000198
PmDXR	POLASIG3	915	(-)	AATAAT	S000088
PmDXR	CAATBOX1	918	(-)	CAAT	S000028
PmDXR	WBOXATNPR1	919	(+)	TTGAC	S000390
PmDXR	BIHD1OS	920	(-)	TGTCA	S000498
PmDXR	WRKY71OS	920	(+)	TGAC	S000447
PmDXR	CACTFTPPCA1	926	(-)	YACT	S000449
PmDXR	GT1CONSENSUS	929	(+)	GRWAAW	S000198
PmDXR	DOFCOREZM	948	(+)	AAAG	S000265
PmDXR	NODCON1GM	948	(+)	AAAGAT	S000461
PmDXR	OSE1ROOTNODULE	948	(+)	AAAGAT	S000467
PmDXR	GATABOX	951	(+)	GATA	S000039
PmDXR	EBOXBNNAPA	986	(-)	CANNTG	S000144
PmDXR	MYCCONSENSUSAT	986	(-)	CANNTG	S000407
PmDXR	EBOXBNNAPA	986	(+)	CANNTG	S000144
PmDXR	MYCCONSENSUSAT	986	(+)	CANNTG	S000407
PmDXR	CCAATBOX1	1008	(+)	CCAAT	S000030
PmDXR	CAATBOX1	1009	(+)	CAAT	S000028
PmDXR	CACTFTPPCA1	1015	(+)	YACT	S000449
PmDXR	CACTFTPPCA1	1018	(+)	YACT	S000449
PmDXR	CAATBOX1	1024	(-)	CAAT	S000028
PmDXR	ARR1AT	1030	(+)	NGATT	S000454
PmDXR	XYLAT	1036	(-)	ACAAAGAA	S000510
PmDXR	DOFCOREZM	1038	(-)	AAAG	S000265
PmDXR	IBOXCORENT	1043	(-)	GATAAGR	S000424
PmDXR	IBOX	1044	(-)	GATAAG	S000124
PmDXR	IBOXCORE	1045	(-)	GATAA	S000199
PmDXR	SREATMSD	1045	(+)	TTATCC	S000470
PmDXR	GATABOX	1046	(-)	GATA	S000039
PmDXR	MYBST1	1046	(-)	GGATA	S000180
PmDXR	SV40COREENHAN	1058	(-)	GTGGWWHG	S000123
PmDXR	DOFCOREZM	1058	(-)	AAAG	S000265
PmDXR	CACTFTPPCA1	1074	(-)	YACT	S000449
PmDXR	CPBCSPOR	1076	(+)	TATTAG	S000491
PmDXR	CACTFTPPCA1	1080	(-)	YACT	S000449
PmDXR	CACTFTPPCA1	1083	(-)	YACT	S000449
PmDXR	CACTFTPPCA1	1086	(-)	YACT	S000449
PmDXR	POLASIG3	1089	(+)	AATAAT	S000088
PmDXR	POLASIG3	1092	(+)	AATAAT	S000088
PmDXR	DPBFCOREDCDC3	1111	(+)	ACACNNG	S000292
PmDXR	CACTFTPPCA1	1112	(+)	YACT	S000449
PmDXR	P1BS	1117	(-)	GNATATNC	S000459
PmDXR	P1BS	1117	(+)	GNATATNC	S000459
PmDXR	GATABOX	1120	(-)	GATA	S000039
PmDXR	MYBST1	1120	(-)	GGATA	S000180
PmDXR	TATCCAOSAMY	1120	(+)	TATCCA	S000403
PmDXR	CACTFTPPCA1	1125	(-)	YACT	S000449
PmDXR	SORLIP1AT	1126	(-)	GCCAC	S000482
PmDXR	GTGANTG10	1143	(-)	GTGA	S000378
PmDXR	ROOTMOTIFTAPOX1	1147	(+)	ATATT	S000098
PmDXR	CACTFTPPCA1	1155	(-)	YACT	S000449
PmDXR	ARE1	1155	(+)	RGTGACNNNGC	S000022
PmDXR	SEBFCONSSTPR10A	1156	(-)	YTGTCWC	S000391
PmDXR	GTGANTG10	1156	(+)	GTGA	S000378
PmDXR	BIHD1OS	1157	(-)	TGTCA	S000498
PmDXR	WRKY71OS	1157	(+)	TGAC	S000447
PmDXR	DOFCOREZM	1170	(-)	AAAG	S000265
PmDXR	TAAAGSTKST1	1170	(-)	TAAAG	S000387
PmDXR	CTRMCAMV35S	1182	(+)	TCTCTCTCT	S000460
PmDXR	CTRMCAMV35S	1184	(+)	TCTCTCTCT	S000460
PmDXR	DOFCOREZM	1194	(+)	AAAG	S000265
PmDXR	POLLEN1LELAT52	1196	(+)	AGAAA	S000245
PmDXR	GT1CONSENSUS	1197	(+)	GRWAAW	S000198
PmDXR	GT1GMSCAM4	1197	(+)	GAAAAA	S000453
PmDXR	DOFCOREZM	1201	(+)	AAAG	S000265
PmDXR	WBBOXPCWRKY1	1207	(+)	TTTGACY	S000310
PmDXR	WBOXATNPR1	1208	(+)	TTGAC	S000390
PmDXR	WRKY71OS	1209	(+)	TGAC	S000447
PmDXR	WBOXNTERF3	1209	(+)	TGACY	S000457
PmHDR1	GATABOX	17	(+)	GATA	S000039
PmHDR1	POLLEN1LELAT52	27	(+)	AGAAA	S000245
PmHDR1	BOXIINTPATPB	53	(+)	ATAGAA	S000296
PmHDR1	DOFCOREZM	64	(+)	AAAG	S000265
PmHDR1	GTGANTG10	75	(-)	GTGA	S000378
PmHDR1	CIACADIANLELHC	78	(+)	CAANNNNATC	S000252
PmHDR1	GTGANTG10	86	(-)	GTGA	S000378
PmHDR1	CAATBOX1	94	(+)	CAAT	S000028
PmHDR1	DPBFCOREDCDC3	98	(+)	ACACNNG	S000292
PmHDR1	CACTFTPPCA1	103	(-)	YACT	S000449
PmHDR1	-10PEHVPSBD	105	(+)	TATTCT	S000392
PmHDR1	WBOXATNPR1	110	(+)	TTGAC	S000390
PmHDR1	HEXMOTIFTAH3H4	111	(-)	ACGTCA	S000053
PmHDR1	UPRMOTIFIAT	111	(-)	CCACGTCA	S000425
PmHDR1	ASF1MOTIFCAMV	111	(+)	TGACG	S000024
PmHDR1	HEXAT	111	(+)	TGACGTGG	S000334
PmHDR1	TGACGTVMAMY	111	(+)	TGACGT	S000377
PmHDR1	WRKY71OS	111	(+)	TGAC	S000447
PmHDR1	ACGTATERD1	113	(-)	ACGT	S000415
PmHDR1	ABRELATERD1	113	(+)	ACGTG	S000414
PmHDR1	ACGTATERD1	113	(+)	ACGT	S000415
PmHDR1	MYB1AT	116	(-)	WAACCA	S000408
PmHDR1	GT1CORE	117	(+)	GGTTAA	S000125
PmHDR1	DOFCOREZM	130	(+)	AAAG	S000265
PmHDR1	NODCON2GM	131	(-)	CTCTT	S000462
PmHDR1	OSE2ROOTNODULE	131	(-)	CTCTT	S000468
PmHDR1	ARFAT	154	(-)	TGTCTC	S000270
PmHDR1	SEBFCONSSTPR10A	154	(-)	YTGTCWC	S000391
PmHDR1	SURECOREATSULTR11	154	(+)	GAGAC	S000499
PmHDR1	CAATBOX1	158	(+)	CAAT	S000028
PmHDR1	SORLIP1AT	162	(-)	GCCAC	S000482
PmHDR1	SORLIP1AT	165	(+)	GCCAC	S000482
PmHDR1	CACTFTPPCA1	167	(+)	YACT	S000449
PmHDR1	CAATBOX1	176	(+)	CAAT	S000028
PmHDR1	POLASIG1	179	(-)	AATAAA	S000080
PmHDR1	TATABOX3	181	(+)	TATTAAT	S000110
PmHDR1	TATABOX3	182	(-)	TATTAAT	S000110
PmHDR1	AMYBOX1	187	(+)	TAACARA	S000020
PmHDR1	MYBGAHV	187	(+)	TAACAAA	S000181
PmHDR1	GAREAT	187	(+)	TAACAAR	S000439
PmHDR1	WBOXNTERF3	221	(-)	TGACY	S000457
PmHDR1	WRKY71OS	222	(-)	TGAC	S000447
PmHDR1	GTGANTG10	223	(-)	GTGA	S000378
PmHDR1	EBOXBNNAPA	231	(-)	CANNTG	S000144
PmHDR1	MYCCONSENSUSAT	231	(-)	CANNTG	S000407
PmHDR1	EBOXBNNAPA	231	(+)	CANNTG	S000144
PmHDR1	MYCCONSENSUSAT	231	(+)	CANNTG	S000407
PmHDR1	WRKY71OS	235	(+)	TGAC	S000447
PmHDR1	WBOXNTERF3	235	(+)	TGACY	S000457
PmHDR1	NODCON2GM	247	(+)	CTCTT	S000462
PmHDR1	OSE2ROOTNODULE	247	(+)	CTCTT	S000468
PmHDR1	DOFCOREZM	249	(-)	AAAG	S000265
PmHDR1	TAAAGSTKST1	249	(-)	TAAAG	S000387
PmHDR1	CARGCW8GAT	249	(-)	CWWWWWWWWG	S000431
PmHDR1	CARGCW8GAT	249	(+)	CWWWWWWWWG	S000431
PmHDR1	TATABOXOSPAL	251	(-)	TATTTAA	S000400
PmHDR1	CCAATBOX1	269	(+)	CCAAT	S000030
PmHDR1	EBOXBNNAPA	270	(-)	CANNTG	S000144
PmHDR1	MYCCONSENSUSAT	270	(-)	CANNTG	S000407
PmHDR1	CAATBOX1	270	(+)	CAAT	S000028
PmHDR1	EBOXBNNAPA	270	(+)	CANNTG	S000144
PmHDR1	MYCCONSENSUSAT	270	(+)	CANNTG	S000407
PmHDR1	CAATBOX1	272	(-)	CAAT	S000028
PmHDR1	CCAATBOX1	272	(-)	CCAAT	S000030
PmHDR1	EBOXBNNAPA	293	(-)	CANNTG	S000144
PmHDR1	DPBFCOREDCDC3	293	(-)	ACACNNG	S000292
PmHDR1	MYCCONSENSUSAT	293	(-)	CANNTG	S000407
PmHDR1	EBOXBNNAPA	293	(+)	CANNTG	S000144
PmHDR1	MYCCONSENSUSAT	293	(+)	CANNTG	S000407
PmHDR1	CACTFTPPCA1	295	(-)	YACT	S000449
PmHDR1	CBFHV	298	(-)	RYCGAC	S000497
PmHDR1	GATABOX	301	(+)	GATA	S000039
PmHDR1	GT1CONSENSUS	301	(+)	GRWAAW	S000198
PmHDR1	IBOXCORE	301	(+)	GATAA	S000199
PmHDR1	INRNTPSADB	316	(-)	YTCANTYY	S000395
PmHDR1	ARR1AT	330	(-)	NGATT	S000454
PmHDR1	GTGANTG10	332	(-)	GTGA	S000378
PmHDR1	CACTFTPPCA1	333	(+)	YACT	S000449
PmHDR1	GATABOX	351	(-)	GATA	S000039
PmHDR1	WBOXHVISO1	356	(+)	TGACT	S000442
PmHDR1	WRKY71OS	356	(+)	TGAC	S000447
PmHDR1	WBOXNTERF3	356	(+)	TGACY	S000457
PmHDR1	LTRECOREATCOR15	361	(-)	CCGAC	S000153
PmHDR1	ARR1AT	364	(+)	NGATT	S000454
PmHDR1	CAATBOX1	366	(-)	CAAT	S000028
PmHDR1	DOFCOREZM	379	(+)	AAAG	S000265
PmHDR1	CACTFTPPCA1	381	(-)	YACT	S000449
PmHDR1	CURECORECR	382	(-)	GTAC	S000493
PmHDR1	CURECORECR	382	(+)	GTAC	S000493
PmHDR1	CACTFTPPCA1	388	(-)	YACT	S000449
PmHDR1	GT1CONSENSUS	404	(-)	GRWAAW	S000198
PmHDR1	-300ELEMENT	412	(-)	TGHAAARK	S000122
PmHDR1	EMHVCHORD	412	(-)	TGTAAAGT	S000452
PmHDR1	NTBBF1ARROLB	412	(+)	ACTTTA	S000273
PmHDR1	-300CORE	413	(-)	TGTAAAG	S000001
PmHDR1	DOFCOREZM	413	(-)	AAAG	S000265
PmHDR1	TAAAGSTKST1	413	(-)	TAAAG	S000387
PmHDR1	DPBFCOREDCDC3	417	(+)	ACACNNG	S000292
PmHDR1	CACTFTPPCA1	418	(+)	YACT	S000449
PmHDR1	CACTFTPPCA1	433	(+)	YACT	S000449
PmHDR1	GT1CONSENSUS	442	(-)	GRWAAW	S000198
PmHDR1	ROOTMOTIFTAPOX1	458	(-)	ATATT	S000098
PmHDR1	GATABOX	460	(-)	GATA	S000039
PmHDR1	CIACADIANLELHC	470	(+)	CAANNNNATC	S000252
PmHDR1	DOFCOREZM	471	(+)	AAAG	S000265
PmHDR1	POLLEN1LELAT52	482	(+)	AGAAA	S000245
PmHDR1	DOFCOREZM	484	(+)	AAAG	S000265
PmHDR1	ROOTMOTIFTAPOX1	495	(-)	ATATT	S000098
PmHDR1	POLLEN1LELAT52	511	(-)	AGAAA	S000245
PmHDR1	WBOXATNPR1	515	(+)	TTGAC	S000390
PmHDR1	BIHD1OS	516	(-)	TGTCA	S000498
PmHDR1	WRKY71OS	516	(+)	TGAC	S000447
PmHDR1	CAATBOX1	520	(-)	CAAT	S000028
PmHDR1	DOFCOREZM	525	(-)	AAAG	S000265
PmHDR1	ARR1AT	538	(+)	NGATT	S000454
PmHDR1	CAATBOX1	540	(-)	CAAT	S000028
PmHDR1	RAV1AAT	542	(-)	CAACA	S000314
PmHDR1	ARR1AT	549	(+)	NGATT	S000454
PmHDR1	QELEMENTZMZM13	554	(+)	AGGTCA	S000254
PmHDR1	WBOXNTERF3	555	(-)	TGACY	S000457
PmHDR1	WBOXNTCHN48	555	(-)	CTGACY	S000508
PmHDR1	WRKY71OS	556	(-)	TGAC	S000447
PmHDR1	INRNTPSADB	567	(+)	YTCANTYY	S000395
PmHDR1	CAATBOX1	569	(+)	CAAT	S000028
PmHDR1	POLLEN1LELAT52	580	(+)	AGAAA	S000245
PmHDR1	GT1CONSENSUS	581	(+)	GRWAAW	S000198
PmHDR1	GT1GMSCAM4	581	(+)	GAAAAA	S000453
PmHDR1	DOFCOREZM	584	(+)	AAAG	S000265
PmHDR1	NODCON1GM	584	(+)	AAAGAT	S000461
PmHDR1	OSE1ROOTNODULE	584	(+)	AAAGAT	S000467
PmHDR1	INRNTPSADB	586	(-)	YTCANTYY	S000395
PmHDR1	ARR1AT	586	(+)	NGATT	S000454
PmHDR1	CIACADIANLELHC	587	(-)	CAANNNNATC	S000252
PmHDR1	CAATBOX1	588	(-)	CAAT	S000028
PmHDR1	EECCRCAH1	591	(+)	GANTTNC	S000494
PmHDR1	CAATBOX1	593	(-)	CAAT	S000028
PmHDR1	ANAERO1CONSENSUS	601	(+)	AAACAAA	S000477
PmHDR1	CPBCSPOR	618	(-)	TATTAG	S000491
PmHDR1	SEF4MOTIFGM7S	636	(+)	RTTTTTR	S000103
PmHDR1	ARR1AT	642	(-)	NGATT	S000454
PmHDR1	GARE2OSREP1	651	(-)	TAACGTA	S000420
PmHDR1	ACGTATERD1	652	(-)	ACGT	S000415
PmHDR1	ACGTATERD1	652	(+)	ACGT	S000415
PmHDR1	LECPLEACS2	656	(+)	TAAAATAT	S000465
PmHDR1	ROOTMOTIFTAPOX1	659	(-)	ATATT	S000098
PmHDR1	GATABOX	661	(-)	GATA	S000039
PmHDR1	INRNTPSADB	667	(+)	YTCANTYY	S000395
PmHDR1	POLASIG1	672	(-)	AATAAA	S000080
PmHDR1	TATABOX5	673	(+)	TTATTT	S000203
PmHDR1	DOFCOREZM	686	(-)	AAAG	S000265
PmHDR1	TAAAGSTKST1	686	(-)	TAAAG	S000387
PmHDR1	TATABOXOSPAL	688	(-)	TATTTAA	S000400
PmHDR1	TATABOX5	690	(-)	TTATTT	S000203
PmHDR1	POLASIG1	691	(+)	AATAAA	S000080
PmHDR1	TATABOXOSPAL	701	(-)	TATTTAA	S000400
PmHDR1	TATABOX5	703	(-)	TTATTT	S000203
PmHDR1	-10PEHVPSBD	720	(+)	TATTCT	S000392
PmHDR1	S1FBOXSORPS1L21	725	(-)	ATGGTA	S000223
PmHDR1	TBOXATGAPB	734	(-)	ACTTTG	S000383
PmHDR1	DOFCOREZM	735	(+)	AAAG	S000265
PmHDR1	WBBOXPCWRKY1	737	(-)	TTTGACY	S000310
PmHDR1	WBOXHVISO1	737	(-)	TGACT	S000442
PmHDR1	WBOXNTERF3	737	(-)	TGACY	S000457
PmHDR1	WBOXATNPR1	738	(-)	TTGAC	S000390
PmHDR1	WRKY71OS	738	(-)	TGAC	S000447
PmHDR1	CIACADIANLELHC	740	(+)	CAANNNNATC	S000252
PmHDR1	DOFCOREZM	741	(+)	AAAG	S000265
PmHDR1	NODCON2GM	742	(-)	CTCTT	S000462
PmHDR1	OSE2ROOTNODULE	742	(-)	CTCTT	S000468
PmHDR1	PRECONSCRHSP70A	749	(-)	SCGAYNRNNNNNNNNNNNNNNNHD	S000506
PmHDR1	CAATBOX1	749	(+)	CAAT	S000028
PmHDR1	ARR1AT	750	(-)	NGATT	S000454
PmHDR1	-10PEHVPSBD	774	(+)	TATTCT	S000392
PmHDR1	DOFCOREZM	781	(+)	AAAG	S000265
PmHDR1	PYRIMIDINEBOXHVEPB1	784	(-)	TTTTTTCC	S000298
PmHDR1	GT1CONSENSUS	784	(+)	GRWAAW	S000198
PmHDR1	GT1CONSENSUS	785	(+)	GRWAAW	S000198
PmHDR1	GT1GMSCAM4	785	(+)	GAAAAA	S000453
PmHDR1	CCA1ATLHCB1	787	(+)	AAMAATCT	S000149
PmHDR1	ARR1AT	790	(-)	NGATT	S000454
PmHDR1	AMYBOX1	796	(+)	TAACARA	S000020
PmHDR1	MYBGAHV	796	(+)	TAACAAA	S000181
PmHDR1	GAREAT	796	(+)	TAACAAR	S000439
PmHDR1	CARGCW8GAT	809	(-)	CWWWWWWWWG	S000431
PmHDR1	CAATBOX1	809	(+)	CAAT	S000028
PmHDR1	CARGCW8GAT	809	(+)	CWWWWWWWWG	S000431
PmHDR1	ARR1AT	821	(+)	NGATT	S000454
PmHDR1	SEF4MOTIFGM7S	831	(+)	RTTTTTR	S000103
PmHDR1	CAATBOX1	843	(+)	CAAT	S000028
PmHDR1	SITEIIATCYTC	846	(+)	TGGGCY	S000474
PmHDR1	POLASIG1	853	(+)	AATAAA	S000080
PmHDR1	EBOXBNNAPA	859	(-)	CANNTG	S000144
PmHDR1	CATATGGMSAUR	859	(-)	CATATG	S000370
PmHDR1	MYCCONSENSUSAT	859	(-)	CANNTG	S000407
PmHDR1	EBOXBNNAPA	859	(+)	CANNTG	S000144
PmHDR1	CATATGGMSAUR	859	(+)	CATATG	S000370
PmHDR1	MYCCONSENSUSAT	859	(+)	CANNTG	S000407
PmHDR1	GT1CONSENSUS	865	(-)	GRWAAW	S000198
PmHDR1	IBOXCORE	866	(-)	GATAA	S000199
PmHDR1	GATABOX	867	(-)	GATA	S000039
PmHDR1	S1FBOXSORPS1L21	879	(+)	ATGGTA	S000223
PmHDR1	EECCRCAH1	890	(-)	GANTTNC	S000494
PmHDR1	GT1CONSENSUS	890	(+)	GRWAAW	S000198
PmHDR1	ARR1AT	893	(-)	NGATT	S000454
PmHDR1	CACTFTPPCA1	897	(+)	YACT	S000449
PmHDR1	CARGCW8GAT	899	(-)	CWWWWWWWWG	S000431
PmHDR1	CARGCW8GAT	899	(+)	CWWWWWWWWG	S000431
PmHDR1	TATABOX5	900	(+)	TTATTT	S000203
PmHDR1	DOFCOREZM	910	(-)	AAAG	S000265
PmHDR1	TAAAGSTKST1	910	(-)	TAAAG	S000387
PmHDR1	CACTFTPPCA1	920	(-)	YACT	S000449
PmHDR1	-10PEHVPSBD	943	(+)	TATTCT	S000392
PmHDR1	CPBCSPOR	950	(-)	TATTAG	S000491
PmHDR1	CACTFTPPCA1	956	(+)	YACT	S000449
PmHDR1	NTBBF1ARROLB	959	(-)	ACTTTA	S000273
PmHDR1	TAAAGSTKST1	959	(+)	TAAAG	S000387
PmHDR1	DOFCOREZM	960	(+)	AAAG	S000265
PmHDR1	CACTFTPPCA1	962	(-)	YACT	S000449
PmHDR1	CAATBOX1	975	(+)	CAAT	S000028
PmHDR1	ARR1AT	976	(-)	NGATT	S000454
PmHDR1	HEXAMERATH4	992	(-)	CCGTCG	S000146
PmHDR1	CGACGOSAMY3	992	(+)	CGACG	S000205
PmHDR1	DOFCOREZM	1007	(+)	AAAG	S000265
PmHDR1	ARR1AT	1016	(-)	NGATT	S000454
PmHDR1	GATABOX	1022	(+)	GATA	S000039
PmHDR1	GT1CONSENSUS	1022	(+)	GRWAAW	S000198
PmHDR1	IBOXCORE	1022	(+)	GATAA	S000199
PmHDR1	TATABOX5	1025	(-)	TTATTT	S000203
PmHDR1	POLASIG1	1026	(+)	AATAAA	S000080
PmHDR1	BIHD1OS	1035	(-)	TGTCA	S000498
PmHDR1	WRKY71OS	1035	(+)	TGAC	S000447
PmHDR1	CAATBOX1	1038	(+)	CAAT	S000028
PmHDR1	GT1CONSENSUS	1040	(-)	GRWAAW	S000198
PmHDR1	ARR1AT	1049	(+)	NGATT	S000454
PmHDR1	CARGCW8GAT	1057	(-)	CWWWWWWWWG	S000431
PmHDR1	CARGCW8GAT	1057	(+)	CWWWWWWWWG	S000431
PmHDR1	WUSATAg	1071	(+)	TTAATGG	S000433
PmHDR1	SITEIIATCYTC	1075	(+)	TGGGCY	S000474
PmHDR1	POLASIG1	1082	(+)	AATAAA	S000080
PmHDR1	EBOXBNNAPA	1088	(-)	CANNTG	S000144
PmHDR1	CATATGGMSAUR	1088	(-)	CATATG	S000370
PmHDR1	MYCCONSENSUSAT	1088	(-)	CANNTG	S000407
PmHDR1	EBOXBNNAPA	1088	(+)	CANNTG	S000144
PmHDR1	CATATGGMSAUR	1088	(+)	CATATG	S000370
PmHDR1	MYCCONSENSUSAT	1088	(+)	CANNTG	S000407
PmHDR1	POLASIG1	1094	(-)	AATAAA	S000080
PmHDR1	CPBCSPOR	1096	(+)	TATTAG	S000491
PmHDR1	MYBCORE	1106	(-)	CNGTTR	S000176
PmHDR1	MYB2AT	1106	(+)	TAACTG	S000177
PmHDR1	MYB2CONSENSUSAT	1106	(+)	YAACKG	S000409
PmHDR1	POLLEN1LELAT52	1118	(+)	AGAAA	S000245
PmHDR1	EECCRCAH1	1119	(-)	GANTTNC	S000494
PmHDR1	DOFCOREZM	1120	(+)	AAAG	S000265
PmHDR1	ABRERATCAL	1125	(-)	MACGYGB	S000507
PmHDR1	ABRELATERD1	1126	(-)	ACGTG	S000414
PmHDR1	T/GBOXATPIN2	1126	(-)	AACGTG	S000458
PmHDR1	ACGTATERD1	1127	(-)	ACGT	S000415
PmHDR1	ACGTATERD1	1127	(+)	ACGT	S000415
PmHDR1	EBOXBNNAPA	1139	(-)	CANNTG	S000144
PmHDR1	MYCCONSENSUSAT	1139	(-)	CANNTG	S000407
PmHDR1	EBOXBNNAPA	1139	(+)	CANNTG	S000144
PmHDR1	MYCCONSENSUSAT	1139	(+)	CANNTG	S000407
PmHDR1	SORLIP1AT	1144	(-)	GCCAC	S000482
PmHDR1	ARR1AT	1171	(+)	NGATT	S000454
PmHDR1	CARGCW8GAT	1195	(-)	CWWWWWWWWG	S000431
PmHDR1	CARGCW8GAT	1195	(+)	CWWWWWWWWG	S000431
PmHDR1	TATABOXOSPAL	1196	(-)	TATTTAA	S000400
PmHDR1	ROOTMOTIFTAPOX1	1199	(-)	ATATT	S000098
PmHDR1	BIHD1OS	1206	(+)	TGTCA	S000498
PmHDR1	WBOXATNPR1	1207	(-)	TTGAC	S000390
PmHDR1	WRKY71OS	1207	(-)	TGAC	S000447
PmHDR1	CAATBOX1	1209	(+)	CAAT	S000028
PmHDR1	ARR1AT	1210	(-)	NGATT	S000454
PmHDR1	NODCON1GM	1211	(-)	AAAGAT	S000461
PmHDR1	OSE1ROOTNODULE	1211	(-)	AAAGAT	S000467
PmHDR1	-300ELEMENT	1213	(-)	TGHAAARK	S000122
PmHDR1	DOFCOREZM	1213	(-)	AAAG	S000265
PmHDR1	GT1CONSENSUS	1214	(-)	GRWAAW	S000198
PmHDR1	GT1GMSCAM4	1214	(-)	GAAAAA	S000453
PmHDR1	INRNTPSADB	1217	(+)	YTCANTYY	S000395
PmHDR1	GTGANTG10	1218	(-)	GTGA	S000378
PmHDR1	CACTFTPPCA1	1219	(+)	YACT	S000449
PmHDR1	DOFCOREZM	1221	(-)	AAAG	S000265
PmHDR1	POLLEN1LELAT52	1223	(-)	AGAAA	S000245
PmHDR1	GTGANTG10	1228	(-)	GTGA	S000378
PmHDR1	CAATBOX1	1231	(+)	CAAT	S000028
PmHDR1	CACTFTPPCA1	1234	(+)	YACT	S000449
PmHDR1	NODCON2GM	1238	(+)	CTCTT	S000462
PmHDR1	OSE2ROOTNODULE	1238	(+)	CTCTT	S000468
PmHDR1	ARR1AT	1250	(+)	NGATT	S000454
PmHDR1	ARR1AT	1259	(+)	NGATT	S000454
PmHDR1	CIACADIANLELHC	1260	(-)	CAANNNNATC	S000252
PmHDR1	MYBCORE	1264	(+)	CNGTTR	S000176
PmHDR1	RAV1AAT	1265	(-)	CAACA	S000314
PmHDR1	RAV1AAT	1268	(-)	CAACA	S000314
PmCMK	GATABOX	8	(+)	GATA	S000039
PmCMK	CACTFTPPCA1	11	(-)	YACT	S000449
PmCMK	SV40COREENHAN	12	(+)	GTGGWWHG	S000123
PmCMK	INRNTPSADB	14	(-)	YTCANTYY	S000395
PmCMK	POLASIG3	24	(-)	AATAAT	S000088
PmCMK	TATABOX5	25	(+)	TTATTT	S000203
PmCMK	P1BS	31	(-)	GNATATNC	S000459
PmCMK	P1BS	31	(+)	GNATATNC	S000459
PmCMK	ROOTMOTIFTAPOX1	33	(+)	ATATT	S000098
PmCMK	INRNTPSADB	36	(+)	YTCANTYY	S000395
PmCMK	CAATBOX1	38	(+)	CAAT	S000028
PmCMK	ARR1AT	39	(-)	NGATT	S000454
PmCMK	TAAAGSTKST1	44	(+)	TAAAG	S000387
PmCMK	DOFCOREZM	45	(+)	AAAG	S000265
PmCMK	NODCON1GM	45	(+)	AAAGAT	S000461
PmCMK	OSE1ROOTNODULE	45	(+)	AAAGAT	S000467
PmCMK	GATABOX	48	(+)	GATA	S000039
PmCMK	GT1CONSENSUS	48	(+)	GRWAAW	S000198
PmCMK	IBOXCORE	48	(+)	GATAA	S000199
PmCMK	CAATBOX1	73	(-)	CAAT	S000028
PmCMK	TATABOX5	85	(-)	TTATTT	S000203
PmCMK	PYRIMIDINEBOXOSRAMY1A	91	(+)	CCTTTT	S000259
PmCMK	DOFCOREZM	92	(-)	AAAG	S000265
PmCMK	GTGANTG10	104	(-)	GTGA	S000378
PmCMK	EBOXBNNAPA	105	(-)	CANNTG	S000144
PmCMK	MYCCONSENSUSAT	105	(-)	CANNTG	S000407
PmCMK	EBOXBNNAPA	105	(+)	CANNTG	S000144
PmCMK	MYCCONSENSUSAT	105	(+)	CANNTG	S000407
PmCMK	CACTFTPPCA1	105	(+)	YACT	S000449
PmCMK	CURECORECR	110	(-)	GTAC	S000493
PmCMK	CURECORECR	110	(+)	GTAC	S000493
PmCMK	CACTFTPPCA1	111	(+)	YACT	S000449
PmCMK	DOFCOREZM	116	(-)	AAAG	S000265
PmCMK	ERELEE4	117	(-)	AWTTCAAA	S000037
PmCMK	EECCRCAH1	120	(-)	GANTTNC	S000494
PmCMK	EBOXBNNAPA	126	(-)	CANNTG	S000144
PmCMK	MYCCONSENSUSAT	126	(-)	CANNTG	S000407
PmCMK	CAATBOX1	126	(+)	CAAT	S000028
PmCMK	EBOXBNNAPA	126	(+)	CANNTG	S000144
PmCMK	MYCCONSENSUSAT	126	(+)	CANNTG	S000407
PmCMK	CAATBOX1	128	(-)	CAAT	S000028
PmCMK	EECCRCAH1	131	(+)	GANTTNC	S000494
PmCMK	CAATBOX1	133	(-)	CAAT	S000028
PmCMK	ROOTMOTIFTAPOX1	151	(+)	ATATT	S000098
PmCMK	GT1CONSENSUS	153	(-)	GRWAAW	S000198
PmCMK	CACTFTPPCA1	159	(-)	YACT	S000449
PmCMK	EBOXBNNAPA	178	(-)	CANNTG	S000144
PmCMK	MYCCONSENSUSAT	178	(-)	CANNTG	S000407
PmCMK	EBOXBNNAPA	178	(+)	CANNTG	S000144
PmCMK	MYCCONSENSUSAT	178	(+)	CANNTG	S000407
PmCMK	ERELEE4	189	(-)	AWTTCAAA	S000037
PmCMK	EECCRCAH1	192	(+)	GANTTNC	S000494
PmCMK	POLLEN1LELAT52	195	(-)	AGAAA	S000245
PmCMK	CAATBOX1	229	(-)	CAAT	S000028
PmCMK	BIHD1OS	231	(+)	TGTCA	S000498
PmCMK	WRKY71OS	232	(-)	TGAC	S000447
PmCMK	CAREOSREP1	238	(-)	CAACTC	S000421
PmCMK	WBOXNTERF3	243	(-)	TGACY	S000457
PmCMK	WRKY71OS	244	(-)	TGAC	S000447
PmCMK	GTGANTG10	245	(-)	GTGA	S000378
PmCMK	EBOXBNNAPA	246	(-)	CANNTG	S000144
PmCMK	MYCCONSENSUSAT	246	(-)	CANNTG	S000407
PmCMK	MYCATERD1	246	(-)	CATGTG	S000413
PmCMK	EBOXBNNAPA	246	(+)	CANNTG	S000144
PmCMK	MYCATRD22	246	(+)	CACATG	S000174
PmCMK	MYCCONSENSUSAT	246	(+)	CANNTG	S000407
PmCMK	ARR1AT	254	(+)	NGATT	S000454
PmCMK	CACTFTPPCA1	259	(-)	YACT	S000449
PmCMK	GATABOX	267	(+)	GATA	S000039
PmCMK	GATABOX	269	(-)	GATA	S000039
PmCMK	MYBST1	269	(-)	GGATA	S000180
PmCMK	AMYBOX2	269	(+)	TATCCAT	S000021
PmCMK	TATCCAYMOTIFOSRAMY3D	269	(+)	TATCCAY	S000256
PmCMK	TATCCAOSAMY	269	(+)	TATCCA	S000403
PmCMK	CACTFTPPCA1	281	(-)	YACT	S000449
PmCMK	CAATBOX1	284	(-)	CAAT	S000028
PmCMK	WBOXATNPR1	285	(+)	TTGAC	S000390
PmCMK	BIHD1OS	286	(-)	TGTCA	S000498
PmCMK	WRKY71OS	286	(+)	TGAC	S000447
PmCMK	RHERPATEXPA7	298	(-)	KCACGW	S000512
PmCMK	GTGANTG10	300	(+)	GTGA	S000378
PmCMK	GT1CONSENSUS	306	(-)	GRWAAW	S000198
PmCMK	GT1GMSCAM4	306	(-)	GAAAAA	S000453
PmCMK	NODCON1GM	312	(-)	AAAGAT	S000461
PmCMK	OSE1ROOTNODULE	312	(-)	AAAGAT	S000467
PmCMK	DOFCOREZM	314	(-)	AAAG	S000265
PmCMK	INRNTPSADB	317	(+)	YTCANTYY	S000395
PmCMK	GTGANTG10	318	(-)	GTGA	S000378
PmCMK	CACTFTPPCA1	319	(+)	YACT	S000449
PmCMK	DOFCOREZM	321	(-)	AAAG	S000265
PmCMK	GT1CONSENSUS	323	(-)	GRWAAW	S000198
PmCMK	IBOXCORE	324	(-)	GATAA	S000199
PmCMK	GATABOX	325	(-)	GATA	S000039
PmCMK	SORLIP2AT	344	(+)	GGGCC	S000483
PmCMK	ROOTMOTIFTAPOX1	351	(-)	ATATT	S000098
PmCMK	ROOTMOTIFTAPOX1	352	(+)	ATATT	S000098
PmCMK	CPBCSPOR	353	(+)	TATTAG	S000491
PmCMK	CACTFTPPCA1	357	(-)	YACT	S000449
PmCMK	GTGANTG10	358	(+)	GTGA	S000378
PmCMK	ARR1AT	359	(+)	NGATT	S000454
PmCMK	CAATBOX1	361	(-)	CAAT	S000028
PmCMK	WBOXATNPR1	362	(+)	TTGAC	S000390
PmCMK	BIHD1OS	363	(-)	TGTCA	S000498
PmCMK	WRKY71OS	363	(+)	TGAC	S000447
PmCMK	MYB1AT	372	(-)	WAACCA	S000408
PmCMK	TBOXATGAPB	384	(-)	ACTTTG	S000383
PmCMK	DOFCOREZM	385	(+)	AAAG	S000265
PmCMK	GATABOX	392	(-)	GATA	S000039
PmCMK	CAATBOX1	395	(+)	CAAT	S000028
PmCMK	ARR1AT	396	(-)	NGATT	S000454
PmCMK	CACTFTPPCA1	401	(-)	YACT	S000449
PmCMK	AACACOREOSGLUB1	407	(+)	AACAAAC	S000353
PmCMK	SORLIP1AT	422	(+)	GCCAC	S000482
PmCMK	REALPHALGLHCB21	433	(+)	AACCAA	S000362
PmCMK	CCAATBOX1	435	(+)	CCAAT	S000030
PmCMK	CAATBOX1	436	(+)	CAAT	S000028
PmCMK	DPBFCOREDCDC3	448	(-)	ACACNNG	S000292
PmCMK	CACTFTPPCA1	450	(-)	YACT	S000449
PmCMK	BIHD1OS	452	(+)	TGTCA	S000498
PmCMK	WRKY71OS	453	(-)	TGAC	S000447
PmCMK	WBOXHVISO1	476	(-)	TGACT	S000442
PmCMK	WBOXNTERF3	476	(-)	TGACY	S000457
PmCMK	WBOXNTCHN48	476	(-)	CTGACY	S000508
PmCMK	WRKY71OS	477	(-)	TGAC	S000447
PmCMK	PREATPRODH	486	(-)	ACTCAT	S000450
PmCMK	CACTFTPPCA1	489	(-)	YACT	S000449
PmCMK	GTGANTG10	492	(+)	GTGA	S000378
PmCMK	ARR1AT	493	(+)	NGATT	S000454
PmCMK	ARR1AT	498	(+)	NGATT	S000454
PmCMK	SURECOREATSULTR11	507	(-)	GAGAC	S000499
PmCMK	DOFCOREZM	512	(-)	AAAG	S000265
PmCMK	TAAAGSTKST1	512	(-)	TAAAG	S000387
PmCMK	MYB1AT	516	(+)	WAACCA	S000408
PmCMK	CACTFTPPCA1	528	(-)	YACT	S000449
PmCMK	PYRIMIDINEBOXOSRAMY1A	544	(+)	CCTTTT	S000259
PmCMK	DOFCOREZM	545	(-)	AAAG	S000265
PmCMK	CARGCW8GAT	555	(-)	CWWWWWWWWG	S000431
PmCMK	CAATBOX1	555	(+)	CAAT	S000028
PmCMK	CARGCW8GAT	555	(+)	CWWWWWWWWG	S000431
PmCMK	POLASIG3	556	(+)	AATAAT	S000088
PmCMK	NODCON1GM	570	(-)	AAAGAT	S000461
PmCMK	OSE1ROOTNODULE	570	(-)	AAAGAT	S000467
PmCMK	DOFCOREZM	572	(-)	AAAG	S000265
PmCMK	TAAAGSTKST1	572	(-)	TAAAG	S000387
PmCMK	MYB1AT	576	(+)	WAACCA	S000408
PmCMK	EBOXBNNAPA	583	(-)	CANNTG	S000144
PmCMK	MYCCONSENSUSAT	583	(-)	CANNTG	S000407
PmCMK	EBOXBNNAPA	583	(+)	CANNTG	S000144
PmCMK	MYCCONSENSUSAT	583	(+)	CANNTG	S000407
PmCMK	CACTFTPPCA1	591	(-)	YACT	S000449
PmCMK	CURECORECR	592	(-)	GTAC	S000493
PmCMK	CURECORECR	592	(+)	GTAC	S000493
PmCMK	CACTFTPPCA1	593	(+)	YACT	S000449
PmCMK	CCAATBOX1	598	(+)	CCAAT	S000030
PmCMK	CAATBOX1	599	(+)	CAAT	S000028
PmCMK	CACTFTPPCA1	604	(-)	YACT	S000449
PmCMK	POLLEN1LELAT52	607	(+)	AGAAA	S000245
PmCMK	TGACGTVMAMY	612	(-)	TGACGT	S000377
PmCMK	ACGTATERD1	612	(-)	ACGT	S000415
PmCMK	HEXMOTIFTAH3H4	612	(+)	ACGTCA	S000053
PmCMK	ACGTATERD1	612	(+)	ACGT	S000415
PmCMK	ASF1MOTIFCAMV	613	(-)	TGACG	S000024
PmCMK	WBOXATNPR1	614	(-)	TTGAC	S000390
PmCMK	WRKY71OS	614	(-)	TGAC	S000447
PmCMK	GT1CONSENSUS	634	(+)	GRWAAW	S000198
PmCMK	WBOXHVISO1	664	(-)	TGACT	S000442
PmCMK	WBOXNTERF3	664	(-)	TGACY	S000457
PmCMK	WBOXATNPR1	665	(-)	TTGAC	S000390
PmCMK	WRKY71OS	665	(-)	TGAC	S000447
PmCMK	CACTFTPPCA1	677	(-)	YACT	S000449
PmCMK	WBOXNTERF3	684	(-)	TGACY	S000457
PmCMK	WRKY71OS	685	(-)	TGAC	S000447
PmCMK	NODCON1GM	688	(-)	AAAGAT	S000461
PmCMK	OSE1ROOTNODULE	688	(-)	AAAGAT	S000467
PmCMK	DOFCOREZM	690	(-)	AAAG	S000265
PmCMK	TAAAGSTKST1	690	(-)	TAAAG	S000387
PmCMK	ARR1AT	695	(-)	NGATT	S000454
PmCMK	GTGANTG10	697	(-)	GTGA	S000378
PmCMK	EBOXBNNAPA	701	(-)	CANNTG	S000144
PmCMK	MYCCONSENSUSAT	701	(-)	CANNTG	S000407
PmCMK	EBOXBNNAPA	701	(+)	CANNTG	S000144
PmCMK	MYCCONSENSUSAT	701	(+)	CANNTG	S000407
PmCMK	EECCRCAH1	711	(+)	GANTTNC	S000494
PmCMK	DOFCOREZM	713	(-)	AAAG	S000265
PmCMK	CAATBOX1	717	(+)	CAAT	S000028
PmCMK	CACTFTPPCA1	722	(-)	YACT	S000449
PmCMK	BIHD1OS	731	(+)	TGTCA	S000498
PmCMK	WRKY71OS	732	(-)	TGAC	S000447
PmCMK	NODCON1GM	735	(-)	AAAGAT	S000461
PmCMK	OSE1ROOTNODULE	735	(-)	AAAGAT	S000467
PmCMK	DOFCOREZM	737	(-)	AAAG	S000265
PmCMK	REALPHALGLHCB21	740	(-)	AACCAA	S000362
PmCMK	MYB1AT	741	(-)	WAACCA	S000408
PmCMK	GT1CORE	742	(+)	GGTTAA	S000125
PmCMK	ARR1AT	747	(-)	NGATT	S000454
PmCMK	POLLEN1LELAT52	752	(+)	AGAAA	S000245
PmCMK	ROOTMOTIFTAPOX1	755	(-)	ATATT	S000098
PmCMK	LECPLEACS2	756	(-)	TAAAATAT	S000465
PmCMK	ROOTMOTIFTAPOX1	756	(+)	ATATT	S000098
PmCMK	EECCRCAH1	786	(+)	GANTTNC	S000494
PmCMK	TBOXATGAPB	792	(-)	ACTTTG	S000383
PmCMK	DOFCOREZM	793	(+)	AAAG	S000265
PmCMK	GT1CORE	810	(-)	GGTTAA	S000125
PmCMK	MYB1AT	811	(+)	WAACCA	S000408
PmCMK	CACTFTPPCA1	823	(-)	YACT	S000449
PmCMK	CURECORECR	831	(-)	GTAC	S000493
PmCMK	CURECORECR	831	(+)	GTAC	S000493
PmCMK	CACTFTPPCA1	832	(+)	YACT	S000449
PmCMK	SEF4MOTIFGM7S	837	(+)	RTTTTTR	S000103
PmCMK	EBOXBNNAPA	849	(-)	CANNTG	S000144
PmCMK	MYCCONSENSUSAT	849	(-)	CANNTG	S000407
PmCMK	EBOXBNNAPA	849	(+)	CANNTG	S000144
PmCMK	MYCCONSENSUSAT	849	(+)	CANNTG	S000407
PmCMK	REALPHALGLHCB21	852	(-)	AACCAA	S000362
PmCMK	MYB1AT	853	(-)	WAACCA	S000408
PmCMK	WBOXNTERF3	861	(-)	TGACY	S000457
PmCMK	WRKY71OS	862	(-)	TGAC	S000447
PmCMK	REALPHALGLHCB21	875	(+)	AACCAA	S000362
PmCMK	CAATBOX1	897	(+)	CAAT	S000028
PmCMK	ATHB6COREAT	897	(+)	CAATTATTA	S000399
PmCMK	POLASIG3	899	(-)	AATAAT	S000088
PmCMK	EBOXBNNAPA	907	(-)	CANNTG	S000144
PmCMK	MYBCORE	907	(-)	CNGTTR	S000176
PmCMK	MYCCONSENSUSAT	907	(-)	CANNTG	S000407
PmCMK	EBOXBNNAPA	907	(+)	CANNTG	S000144
PmCMK	MYCCONSENSUSAT	907	(+)	CANNTG	S000407
PmCMK	MYB2CONSENSUSAT	907	(+)	YAACKG	S000409
PmCMK	CACTFTPPCA1	915	(+)	YACT	S000449
PmCMK	ARR1AT	922	(+)	NGATT	S000454
PmCMK	CACTFTPPCA1	936	(+)	YACT	S000449
PmCMK	ARR1AT	941	(+)	NGATT	S000454
PmCMK	EECCRCAH1	942	(+)	GANTTNC	S000494
PmCMK	TATABOX5	961	(-)	TTATTT	S000203
PmCMK	POLASIG1	962	(+)	AATAAA	S000080
PmCMK	TAAAGSTKST1	964	(+)	TAAAG	S000387
PmCMK	DOFCOREZM	965	(+)	AAAG	S000265
PmCMK	POLLEN1LELAT52	967	(+)	AGAAA	S000245
PmCMK	GT1CONSENSUS	968	(+)	GRWAAW	S000198
PmCMK	GT1GMSCAM4	968	(+)	GAAAAA	S000453
PmCMK	RAV1AAT	975	(-)	CAACA	S000314
PmCMK	ARR1AT	987	(-)	NGATT	S000454
PmCMK	WUSATAg	990	(-)	TTAATGG	S000433
PmCMK	NTBBF1ARROLB	994	(-)	ACTTTA	S000273
PmCMK	TAAAGSTKST1	994	(+)	TAAAG	S000387
PmCMK	DOFCOREZM	995	(+)	AAAG	S000265
PmCMK	TATABOXOSPAL	999	(-)	TATTTAA	S000400
PmCMK	ROOTMOTIFTAPOX1	1002	(-)	ATATT	S000098
PmCMK	POLLEN1LELAT52	1023	(+)	AGAAA	S000245
PmCMK	WBOXHVISO1	1035	(-)	TGACT	S000442
PmCMK	WBOXNTERF3	1035	(-)	TGACY	S000457
PmCMK	WRKY71OS	1036	(-)	TGAC	S000447
PmCMK	GTGANTG10	1037	(-)	GTGA	S000378
PmCMK	EBOXBNNAPA	1038	(-)	CANNTG	S000144
PmCMK	MYCCONSENSUSAT	1038	(-)	CANNTG	S000407
PmCMK	MYCATERD1	1038	(-)	CATGTG	S000413
PmCMK	EBOXBNNAPA	1038	(+)	CANNTG	S000144
PmCMK	MYCATRD22	1038	(+)	CACATG	S000174
PmCMK	MYCCONSENSUSAT	1038	(+)	CANNTG	S000407
PmCMK	EBOXBNNAPA	1040	(-)	CANNTG	S000144
PmCMK	MYCATRD22	1040	(-)	CACATG	S000174
PmCMK	MYCCONSENSUSAT	1040	(-)	CANNTG	S000407
PmCMK	EBOXBNNAPA	1040	(+)	CANNTG	S000144
PmCMK	MYCCONSENSUSAT	1040	(+)	CANNTG	S000407
PmCMK	MYCATERD1	1040	(+)	CATGTG	S000413
PmCMK	GTGANTG10	1043	(+)	GTGA	S000378
PmCMK	GT1CONSENSUS	1045	(+)	GRWAAW	S000198
PmCMK	INRNTPSADB	1046	(-)	YTCANTYY	S000395
PmCMK	P1BS	1051	(-)	GNATATNC	S000459
PmCMK	P1BS	1051	(+)	GNATATNC	S000459
PmCMK	ROOTMOTIFTAPOX1	1052	(-)	ATATT	S000098
[truncated: 508 more rows]
